# Supplementary material for: An efficient synthesis of optically active trifluoromethyl aldimines via asymmetric biomimetic transamination
Source: Royal Society of Chemistry journal article supplement (doi:10.1039/c2cc37423d), 2012-12-21

# An efficient synthesis of optically active trifluoromethyl aldimines via asymmetric biomimetic transamination

Mao Liu,<sup>a</sup> Jing Li,<sup>a</sup> Xiao Xiao,<sup>a</sup> Ying Xie<sup>a</sup> and Yian Shi\*<sup>a,b</sup>

<sup>a</sup> *Beijing National Laboratory for Molecular Sciences, CAS Key Laboratory of Molecular Recognition and Function, Institute of Chemistry, Chinese Academy of Sciences, Beijing 100190, China.*

<sup>b</sup> *Department of Chemistry, Colorado State University, Fort Collins, Colorado 80523, USA*

## Supporting Information

### Table of Contents

|                                                      |      |
|------------------------------------------------------|------|
| General methods                                      | S-2  |
| Experimental procedures and characterization data    | S-3  |
| HPLC data for determination of enantiomeric excesses | S-17 |
| The X-ray structure of compound <b>7a</b>            | S-25 |
| NMR spectra                                          | S-35 |

**General Methods.** All commercially available reagents were used without further purification. All dry solvents were freshly distilled under nitrogen from appropriate drying agents before use. Benzene, tetrahydrofuran, and ethyl ether were distilled from sodium-benzophenone. Dichloromethane was distilled from CaH<sub>2</sub>. Chloroform was distilled from P<sub>2</sub>O<sub>5</sub>. *N,N*-Dimethylformamide was dried over 4 Å molecular sieves (activated at 180 °C over 8 h in vacuum). Column chromatography was performed on silica gel (200-300 mesh). <sup>1</sup>H NMR spectra were recorded on a 400 MHz NMR spectrometer, <sup>19</sup>F NMR spectra were recorded on a 376 MHz NMR spectrometer, and <sup>13</sup>C NMR spectra were recorded on a 100 MHz NMR spectrometer. IR spectra were recorded on a FT-IR spectrometer. Melting points were uncorrected. α-Trifluoromethyl ketones were prepared according to the reported procedures.<sup>1-4</sup> (2-Chloro-4-cyano)benzylamine was prepared from 3-chloro-4-methylbenzonitrile by benzylic bromination with NBS<sup>5</sup> and subsequent amination with hexamethylenetetramine.<sup>6</sup> α-Trifluoromethyl imines were prepared according to the reported procedure with slight modification<sup>7</sup> and purified by flash chromatography or recrystallization.

- 1) J. Ichikawa, M. Yokota, T. Kudo and S. Umezaki, *Angew. Chem., Int. Ed.*, 2008, **47**, 4870.
- 2) S. Nahm and S. M. Weinreb, *Tetrahedron Lett.*, 1981, **39**, 3815.
- 3) L. K. Kees, T. J. Caggiano, K. E. Steiner, J. J. Fitzgerald, M. J. Kates, E. T. Christos, J. M. Kulishoff, R. D. Moore and M. L. McCaleb, *J. Med. Chem.*, 1995, **38**, 617.
- 4) J. O. Smith, B. K. Mandal, R. Filler and J. W. Beery, *J. Fluorine Chem.*, 1997, **81**, 123.
- 5) Y. A. Kim, A. Sharon, C. K. Chu, R. H. Rais, O. N. A. Safarjalani, F. N. M. Naguib and M. H. el Kouni, *Biochemical Pharmacology*, 2007, **73**, 1558.
- 6) N. Blazevic, D. Kolbah, B. Belin, V. Sunjic and F. Kajfez, *Synthesis*, 1979, **3**, 161.
- 7) D. O. Berbasov, I. D. Ojemaye and V. A. Soloshonok, *J. Fluorine Chem.*, 2004, **125**, 603.

## Preparation of catalyst C10

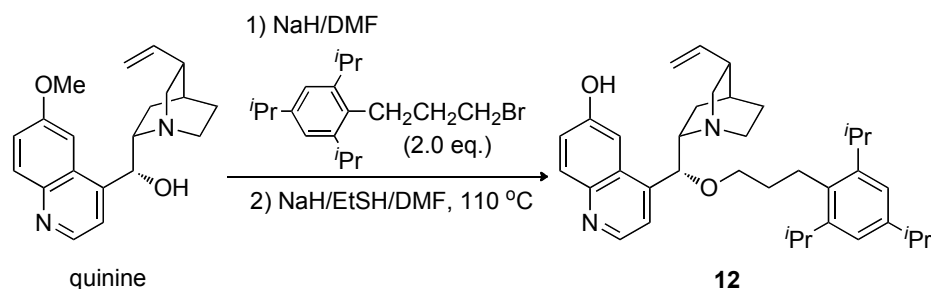

To a solution of quinine (10.18 g, 31.4 mmol) in dry DMF (80 mL) was added NaH (70% suspension in mineral oil) (3.23 g, 94.2 mmol) portionwise at rt under N<sub>2</sub>.<sup>1,2</sup> After the reaction mixture was stirred at rt for 1 h, a solution of 2-(3-bromopropyl)-1,3,5-triisopropylbenzene<sup>3</sup> (19.90 g, 61.3 mmol) in DMF (20 mL) was added. Upon stirring at 40 °C overnight, the reaction mixture was quenched with brine (100 mL), extracted with EtOAc (3 x 200 mL), washed with brine (5 x 100 mL), dried over MgSO<sub>4</sub>, filtered, and concentrated. The resulting crude product was subjected to the next step without further purification.

To a suspension of NaH (70% in mineral oil) (5.38 g, 157.0 mmol) (washed with hexane, dried under vacuum) in dry DMF (122 mL) was added EtSH (19.82 g, 314.0 mmol) dropwise at 0 °C under N<sub>2</sub> over 20 min. After the reaction mixture was stirred at rt for 20 min, a solution of the above crude product in dry DMF (60 mL) was added dropwise at rt over 10 min. Upon stirring at 110 °C overnight, the reaction mixture was acidified with 4N HCl to pH 3, diluted with brine (100 mL), and extracted with EtOAc (3 x 200 mL). The organic phase was brought to pH 10 with NH<sub>4</sub>OH, washed with brine (3 x 100 mL), dried over MgSO<sub>4</sub>, filtered, concentrated, and purified by flash chromatography (silica gel, EtOAc/MeOH = 20/1-5/1) to give compound **12** as a light yellow solid (14.97 g, 86% overall yield). mp. 95-97 °C;  $[\alpha]_{\text{D}}^{20} = -27.4$  (*c* 1.02, CHCl<sub>3</sub>); IR (film) 3414, 1618, 772 cm<sup>-1</sup>; <sup>1</sup>H NMR (400 MHz, CDCl<sub>3</sub>) δ 9.25 (br s, 1H), 8.74 (d, *J* = 4.4 Hz, 1H), 8.18 (s, 1H), 8.06 (d, *J* = 9.2 Hz, 1H), 7.50 (d, *J* = 4.0 Hz, 1H), 7.36 (dd, *J* = 9.2, 2.0 Hz, 1H), 7.02 (s, 2H), 5.75-5.59 (m, 1H), 5.50 (s, 1H), 4.94 (d, *J* = 17.2 Hz, 1H), 4.89 (d, *J* = 10.4 Hz, 1H), 3.86-3.65 (m, 1H), 3.61-3.45 (m, 2H), 3.36-3.18 (m, 3H), 3.14-3.00 (m, 1H), 3.00-2.74 (m, 4H), 2.73-2.60 (m, 1H), 2.48-2.34 (m, 1H), 2.25-2.10 (m, 1H), 2.08-1.75 (m, 4H), 1.75-1.61

(m, 1H), 1.60-1.45 (m, 1H), 1.42-1.18 (m, 18H);  $^{13}\text{C}$  NMR (100 MHz,  $\text{CDCl}_3$ )  $\delta$  157.1, 146.8, 146.59, 146.55, 144.7, 143.9, 141.0, 133.1, 131.4, 128.3, 123.4, 121.2, 118.0, 115.2, 107.4, 79.0, 69.7, 59.8, 56.6, 43.5, 39.7, 34.3, 32.7, 29.4, 28.1, 27.2, 25.1, 24.8, 24.7, 24.3, 20.1; HRMS Calcd for  $\text{C}_{37}\text{H}_{51}\text{N}_2\text{O}_2$  (M+H): 555.3945; Found: 555.3943.

- 1) X. Xiao, Y. Xie, C. Su, M. Liu and Y. Shi, *J. Am. Chem. Soc.*, 2011, **133**, 12914.
- 2) Y. Liu, B. Sun, B. Wang, M. Wakem and L. Deng, *J. Am. Chem. Soc.*, 2009, **131**, 418.
- 3) M. A. Bennett, A. J. Edwards, J. R. Harper, T. Khimyak and A. C. Wills, *J. Organomet. Chem.*, 2001, **629**, 7.

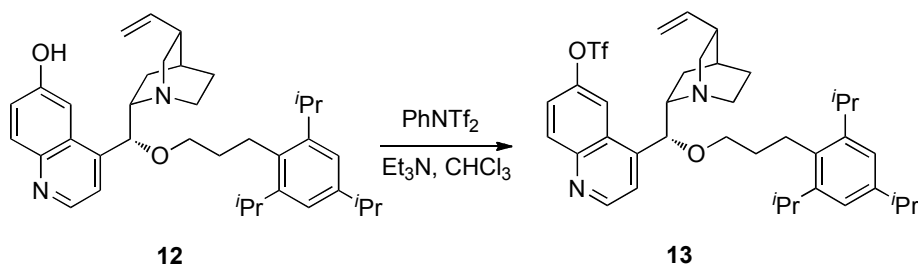

To a solution of compound **12** (14.97 g, 27.0 mmol) and  $\text{PhNTf}_2$  (11.56 g, 32.4 mmol) in  $\text{CHCl}_3$  (200 mL) was added  $\text{Et}_3\text{N}$  (6.28 g, 62.1 mmol) at rt.<sup>1</sup> Upon stirring at rt overnight, the reaction mixture was washed with 2N HCl (2 x 40 mL), saturated  $\text{Na}_2\text{CO}_3$  aqueous (2 x 40 mL), dried over  $\text{MgSO}_4$ , filtered, concentrated, and purified by flash chromatography (silica gel, packed with EtOAc containing 2%  $\text{Et}_3\text{N}$ ) (eluted with EtOAc/MeOH/ $\text{Et}_3\text{N}$  = 200/5/2) to give compound **13** as an orange oil (18.19 g, 98% yield).  $[\alpha]_{\text{D}}^{20} = -14.1$  ( $c$  1.29,  $\text{CHCl}_3$ ); IR (film) 1508, 1425, 1142  $\text{cm}^{-1}$ ;  $^1\text{H}$  NMR (400 MHz,  $\text{CDCl}_3$ )  $\delta$  8.97 (d,  $J = 4.4$  Hz, 1H), 8.35-8.20 (m, 2H), 7.66-7.52 (m, 2H), 7.01 (s, 2H), 5.87-5.74 (m, 1H), 5.10-4.91 (m, 3H), 3.55-3.45 (m, 2H), 3.44-3.28 (m, 1H), 3.28-3.12 (m, 3H), 3.09-2.98 (m, 1H), 2.93-2.56 (m, 5H), 2.33-2.23 (m, 1H), 1.92-1.70 (m, 6H), 1.63-1.50 (m, 1H), 1.37-1.13 (m, 18H);  $^{13}\text{C}$  NMR (100 MHz,  $\text{CDCl}_3$ )  $\delta$  151.5, 147.82, 147.75, 147.3, 146.61, 146.57, 142.1, 133.4, 133.1, 126.9, 123.9, 122.9, 121.2, 120.8, 120.7, 117.5, 116.3, 114.5, 114.3, 83.0, 70.3, 61.2, 57.0, 43.0, 40.1, 34.3, 32.5, 29.4, 28.2, 28.1, 24.9, 24.7, 24.3, 24.0; HRMS Calcd for  $\text{C}_{38}\text{H}_{50}\text{F}_3\text{N}_2\text{O}_4\text{S}$ (M+H): 687.3438; Found: 687.3439.

- 1) Y. Liu, B. Sun, B. Wang, M. Wakem and L. Deng, *J. Am. Chem. Soc.*, 2009, **131**, 418.

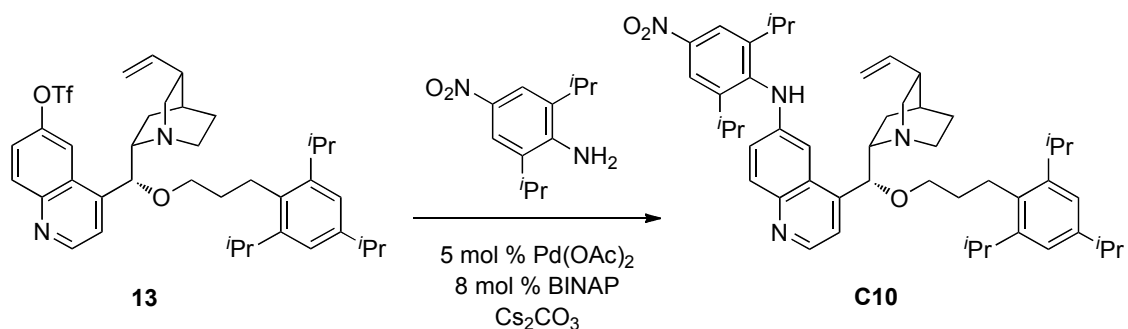

To a flask charged with 2,6-diisopropyl-4-nitroaniline<sup>1</sup> (5.728 g, 25.77 mmol), Pd(OAc)<sub>2</sub> (0.241 g, 1.07 mmol), BINAP (1.070 g, 1.72 mmol), and Cs<sub>2</sub>CO<sub>3</sub> (9.798 g, 30.07 mmol) was added a solution of compound **13** (14.755 g, 21.48 mmol) in toluene (210 mL) under N<sub>2</sub>.<sup>2</sup> Upon stirring at reflux for 15 h, the reaction mixture was filtered through a Celite pad, washed with EtOAc, concentrated, and purified by flash chromatography (silica gel, CH<sub>2</sub>Cl<sub>2</sub>/MeOH = 55/1) to give a residue, which was purified again by flash chromatography (silica gel, packed with CH<sub>2</sub>Cl<sub>2</sub> containing 2% Et<sub>3</sub>N) (eluted with CH<sub>2</sub>Cl<sub>2</sub>/MeOH = 80/1) to give compound **C10** as a yellow solid (11.724 g, 72% yield). mp. 154-156 °C; [α]<sub>D</sub><sup>20</sup> = -44.5 (c 1.04, CHCl<sub>3</sub>); IR (film) 3387, 1624, 1328 cm<sup>-1</sup>; <sup>1</sup>H NMR (400 MHz, CDCl<sub>3</sub>) δ 8.69 (d, *J* = 4.8 Hz, 1H), 8.14 (s, 2H), 7.98 (d, *J* = 9.2 Hz, 1H), 7.43 (d, *J* = 2.8 Hz, 1H), 7.06-6.96 (m, 4H), 5.77-5.65 (m, 2H), 5.06-4.87 (m, 3H), 3.51-3.12 (m, 7H), 3.08-2.70 (m, 5H), 2.70-2.57 (m, 1H), 2.57-2.46 (m, 1H), 2.30-2.20 (m, 1H), 1.92-1.68 (m, 5H), 1.58-1.44 (m, 2H), 1.30-1.15 (m, 30H); <sup>13</sup>C NMR (100 MHz, CDCl<sub>3</sub>) δ 148.9, 147.1, 147.0, 146.5, 146.4, 145.1, 144.7, 144.0, 142.0, 141.6, 133.1, 132.0, 128.1, 121.1, 119.9, 119.4, 118.6, 114.3, 102.8, 80.9, 69.7, 60.3, 57.2, 43.3, 40.2, 34.2, 32.6, 29.3, 29.0, 28.1, 27.9, 24.9, 24.7, 24.6, 24.2, 23.8, 23.4, 21.7; HRMS Calcd for C<sub>49</sub>H<sub>67</sub>N<sub>4</sub>O<sub>3</sub> (M+H): 759.5208; Found: 759.5190.

- 1) F. J. Carver, C. A. Hunter, D. J. Livingstone, J. F. McCabe and E. M. Seward, *Chem. Eur. J.*, 2002, **8**, 13.
- 2) (a) A. S. Guram and S. L. Buckwald, *J. Am. Chem. Soc.*, 1994, **116**, 7901; (b) Y. Liu, B. Sun, B. Wang, M. Wakem and L. Deng, *J. Am. Chem. Soc.*, 2009, **131**, 418.

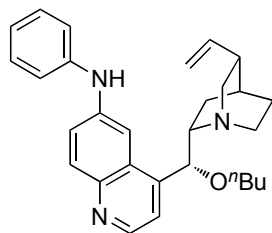

**C7**

Prepared in a manner similar to **C10**. Brown solid (67% yield from the corresponding triflate); mp. 65-67 °C;  $[\alpha]_D^{20} = -136.9$  (*c* 1.02, CHCl<sub>3</sub>); IR (film) 3282, 1597, 771 cm<sup>-1</sup>; <sup>1</sup>H NMR (400 MHz, CDCl<sub>3</sub>) δ 8.69 (d, *J* = 3.6 Hz, 1H), 8.00 (d, *J* = 8.8 Hz, 1H), 7.65 (s, 1H), 7.56 (d, *J* = 8.8 Hz, 1H), 7.42-7.23 (m, 3H), 7.18 (d, *J* = 7.6 Hz, 2H), 6.99 (t, *J* = 6.8 Hz, 1H), 6.51 (s, 1H), 5.80-5.67 (m, 1H), 5.10 (br s, 1H), 5.02-4.88 (m, 2H), 3.55-3.41 (m, 1H), 3.41-3.27 (m, 2H), 3.23-3.05 (m, 2H), 2.82-2.66 (m, 2H), 2.38-2.26 (m, 1H), 1.92-1.75 (m, 3H), 1.67-1.47 (m, 4H), 1.46-1.34 (m, 2H), 0.91 (t, *J* = 7.2 Hz, 3H); <sup>13</sup>C NMR (100 MHz, CDCl<sub>3</sub>) δ 147.4, 144.7, 144.6, 142.5, 142.0, 141.8, 131.6, 129.7, 127.9, 122.2, 122.1, 118.8, 118.5, 114.7, 106.8, 80.9, 69.5, 60.5, 57.2, 43.4, 40.1, 32.3, 28.1, 27.7, 21.8, 19.7, 14.1; HRMS Calcd for C<sub>29</sub>H<sub>36</sub>N<sub>3</sub>O (M+H): 442.2853; Found: 442.2855.

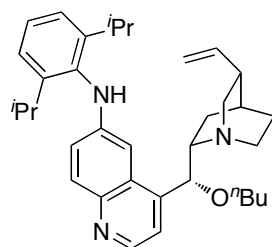

**C8**

Prepared in a manner similar to **C10**. Yellow solid (48% yield from the corresponding triflate); mp. 204-206 °C;  $[\alpha]_D^{20} = -130.7$  (*c* 1.14, CHCl<sub>3</sub>); IR (film) 3333, 1621, 732 cm<sup>-1</sup>; <sup>1</sup>H NMR (400 MHz, CDCl<sub>3</sub>) δ 8.59 (d, *J* = 4.0 Hz, 1H), 7.86 (d, *J* = 8.8 Hz, 1H), 7.38-7.20 (m, 5H), 6.85 (d, *J* = 8.8 Hz, 1H), 6.20 (br s, 1H), 5.76-5.63 (m, 1H), 5.32 (br s, 1H), 5.10-4.97 (m, 2H), 3.78-3.58 (m, 1H), 3.50-3.38 (m, 2H), 3.37-3.18 (m, 4H), 3.03-2.85 (m, 2H), 2.56-2.45 (m, 1H), 2.10-1.89 (m, 3H), 1.79-1.67 (m, 1H), 1.67-1.51 (m, 3H), 1.49-1.36 (m, 2H), 1.51 (t, *J* = 8.0 Hz, 12H), 0.94 (t, *J* = 7.6 Hz, 3H); <sup>13</sup>C NMR (100 MHz, CDCl<sub>3</sub>) δ 148.2, 147.2, 145.9, 143.4, 142.9, 140.9, 134.9, 131.6, 128.2, 128.0, 124.2, 118.9, 118.4, 115.2, 101.4, 79.6, 69.5, 60.1, 56.6, 43.4, 39.5, 32.3, 28.6, 28.0, 27.0, 24.2, 24.0, 21.2,

19.7, 14.1; HRMS Calcd for C<sub>35</sub>H<sub>48</sub>N<sub>3</sub>O (M+H): 526.3792; Found: 526.3788.

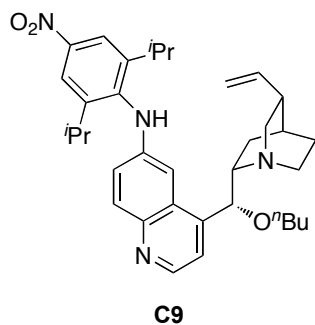

Prepared in a manner similar to **C10**. Yellow solid (70% yield from the corresponding triflate); mp. 234-235 °C;  $[\alpha]_D^{20} = -89.9$  (*c* 0.95, CHCl<sub>3</sub>); IR (film) 3383, 1623, 1328 cm<sup>-1</sup>; <sup>1</sup>H NMR (400 MHz, CDCl<sub>3</sub>) δ 8.65 (d, *J* = 4.4 Hz, 1H), 8.12 (s, 2H), 7.95 (d, *J* = 9.2 Hz, 1H), 7.36 (d, *J* = 4.4 Hz, 1H), 7.08-6.97 (m, 2H), 5.77 (s, 1H), 5.74-5.63 (m, 1H), 4.98-4.78 (m, 3H), 3.35-3.17 (m, 5H), 3.04-2.95 (m, 1H), 2.95-2.86 (m, 1H), 2.63-2.51 (m, 1H), 2.51-2.34 (m, 1H), 2.27-2.17 (m, 1H), 1.78-1.61 (m, 3H), 1.60-1.32 (m, 6H), 1.21 (d, *J* = 6.8 Hz, 6H), 1.18 (d, *J* = 6.8 Hz, 6H), 0.89 (t, *J* = 7.2 Hz, 3H); <sup>13</sup>C NMR (100 MHz, CDCl<sub>3</sub>) δ 148.8, 147.2, 147.1, 144.89, 144.86, 144.2, 142.2, 141.7, 132.0, 128.2, 119.9, 119.3, 119.1, 114.3, 103.3, 81.5, 69.5, 60.4, 57.3, 43.2, 40.3, 32.3, 29.0, 28.1, 27.9, 23.8, 23.5, 22.3, 19.7, 14.1; HRMS Calcd for C<sub>35</sub>H<sub>47</sub>N<sub>4</sub>O<sub>3</sub> (M+H): 571.3643; Found: 571.3640.

### Representative procedure for asymmetric [1,3]-proton shift of trifluoromethyl ketimine (Table 2, entry 1)

To a tube charged with imine **7a** (0.175 g, 0.50 mmol) and catalyst **C10** (0.038 g, 0.050 mmol) was added dry benzene (0.5 mL). Upon stirring at 20 °C for 72 h, the reaction mixture was purified by flash chromatography (silica gel, hexane/Et<sub>2</sub>O = 15/1) to give product **8a** as a colorless oil (0.174 g, 99% yield). The sample was subjected to chiral HPLC (chiralpak AD-H column) to determine the enantiomeric excess.

**Table 2, entry 1**

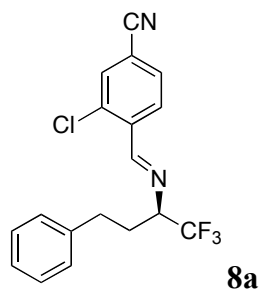

Colorless oil;  $[\alpha]_D^{20} = +160.5$  (*c* 1.10, CHCl<sub>3</sub>) (94% ee); IR (film) 3028, 2233, 1641 cm<sup>-1</sup>; <sup>1</sup>H NMR (400 MHz, CDCl<sub>3</sub>) δ 8.66 (s, 1H), 8.23 (d, *J* = 8.0 Hz, 1H), 7.73 (d, *J* = 1.2 Hz, 1H), 7.62 (d, *J* = 8.4 Hz, 1H), 7.34-7.27 (m, 2H), 7.25-7.18 (m, 1H), 7.18-7.13 (m, 2H), 3.81-3.70 (m, 1H), 2.78-2.68 (m, 1H), 2.57-2.47 (m, 1H), 2.36-2.19 (m, 2H); <sup>13</sup>C NMR (100 MHz, CDCl<sub>3</sub>) δ 161.1, 139.8, 136.1, 135.9, 133.2, 130.4, 129.4, 128.7, 128.4, 126.4, 125.1 (q, *J*<sub>C-F</sub> = 279.0 Hz), 116.9, 115.9, 70.8 (q, *J*<sub>C-F</sub> = 28.0 Hz), 31.1, 29.8; <sup>19</sup>F NMR (376 MHz, CDCl<sub>3</sub>) δ -74.4 (d, *J* = 7.5 Hz); HRMS Calcd for C<sub>18</sub>H<sub>15</sub>ClF<sub>3</sub>N<sub>2</sub> (M+H): 351.0870; Found: 351.0872.

**Table 2, entry 2**

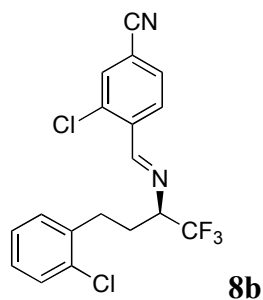

Yellow oil;  $[\alpha]_D^{20} = +119.7$  (*c* 1.26, CHCl<sub>3</sub>) (94% ee); IR (film) 2233, 1642 cm<sup>-1</sup>; <sup>1</sup>H NMR (400 MHz, CDCl<sub>3</sub>) δ 8.74 (s, 1H), 8.22 (d, *J* = 8.4 Hz, 1H), 7.72 (d, *J* = 1.2 Hz, 1H), 7.61 (d, *J* = 8.0 Hz, 1H), 7.33 (d, *J* = 7.6 Hz, 1H), 7.22-7.12 (m, 3H), 3.85-3.75 (m, 1H), 2.80-2.66 (m, 2H), 2.37-2.16 (m, 2H); <sup>13</sup>C NMR (100 MHz, CDCl<sub>3</sub>) δ 161.3, 137.9, 136.4, 136.3, 134.2, 133.6, 130.7, 130.5, 130.0, 129.8, 128.2, 127.2, 125.1 (q, *J*<sub>C-F</sub> = 279.0 Hz), 117.2, 116.2, 71.5, (q, *J*<sub>C-F</sub> = 28.0 Hz), 29.4, 28.9; <sup>19</sup>F NMR (376 MHz, CDCl<sub>3</sub>) δ -74.4 (d, *J* = 7.5 Hz); HRMS Calcd for C<sub>18</sub>H<sub>14</sub>Cl<sub>2</sub>F<sub>3</sub>N<sub>2</sub> (M+H): 385.0481; Found: 385.0482.



**Table 2, entry 3**

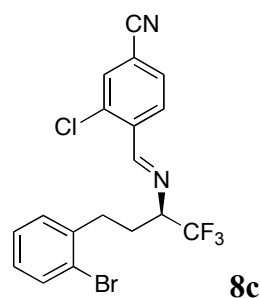

Colorless oil;  $[\alpha]_D^{20} = +108.5$  (*c* 1.11, CHCl<sub>3</sub>) (94% ee); IR (film) 2233, 1642 cm<sup>-1</sup>; <sup>1</sup>H NMR (400 MHz, CDCl<sub>3</sub>) δ 8.75 (s, 1H), 8.23 (d, *J* = 8.0 Hz, 1H), 7.71 (d, *J* = 1.2 Hz, 1H), 7.60 (dd, *J* = 8.0, 0.8 Hz, 1H), 7.51 (dd, *J* = 8.0, 1.2 Hz, 1H), 7.27-7.17 (m, 2H), 7.10-7.03 (m, 1H), 3.88-3.77 (m, 1H), 2.80-2.67 (m, 2H), 2.36-2.16 (m, 2H); <sup>13</sup>C NMR (100 MHz, CDCl<sub>3</sub>) δ 161.2, 139.6, 136.4, 136.2, 133.4, 133.2, 130.6, 130.4, 129.7, 128.3, 127.8, 125.1 (q, *J*<sub>C-F</sub> = 279.0 Hz), 124.5, 117.1, 116.1, 71.4 (q, *J*<sub>C-F</sub> = 28.0 Hz), 31.9, 29.0; <sup>19</sup>F NMR (376 MHz, CDCl<sub>3</sub>) δ -74.3 (d, *J* = 7.5 Hz); HRMS Calcd for C<sub>18</sub>H<sub>14</sub>BrClF<sub>3</sub>N<sub>2</sub> (M+H): 428.9976; Found: 428.9980.

**Table 2, entry 4**

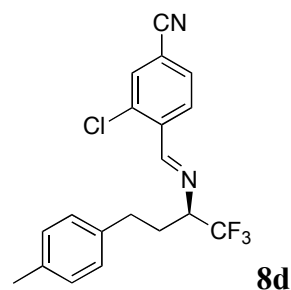

Colorless oil;  $[\alpha]_D^{20} = +154.2$  (*c* 1.05, CHCl<sub>3</sub>) (94% ee); IR (film) 2233, 1641 cm<sup>-1</sup>; <sup>1</sup>H NMR (400 MHz, CDCl<sub>3</sub>) δ 8.65 (s, 1H), 8.23 (d, *J* = 8.0 Hz, 1H), 7.73 (d, *J* = 1.2 Hz, 1H), 7.62 (d, *J* = 8.0 Hz, 1H), 7.11 (d, *J* = 8.0 Hz, 2H), 7.05 (d, *J* = 8.0 Hz, 2H), 3.79-3.69 (m, 1H), 2.74-2.64 (m, 1H), 2.53-2.42 (m, 1H), 2.32 (s, 3H), 2.30-2.15 (m, 2H); <sup>13</sup>C NMR (100 MHz, CDCl<sub>3</sub>) δ 161.1, 136.7, 136.3, 136.09, 136.07, 133.4, 130.6, 129.6, 129.5, 128.4, 125.2 (q, *J*<sub>C-F</sub> = 279.0 Hz), 117.1, 116.0, 71.0 (q, *J*<sub>C-F</sub> = 28.0 Hz), 30.8, 29.9, 21.0; <sup>19</sup>F NMR (376 MHz, CDCl<sub>3</sub>) δ -74.4 (d, *J* = 7.5 Hz); HRMS Calcd for C<sub>19</sub>H<sub>17</sub>ClF<sub>3</sub>N<sub>2</sub> (M+H): 365.1027; Found: 365.1027.

**Table 2, entry 5**

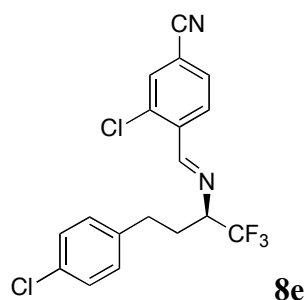

Colorless oil;  $[\alpha]_{\text{D}}^{20} = +150.2$  (*c* 1.07,  $\text{CHCl}_3$ ) (93% ee); IR (film) 2233, 1640  $\text{cm}^{-1}$ ;  $^1\text{H}$  NMR (400 MHz,  $\text{CDCl}_3$ )  $\delta$  8.65 (s, 1H), 8.21 (d,  $J = 8.0$  Hz, 1H), 7.72 (d,  $J = 1.2$  Hz, 1H), 7.61 (d,  $J = 8.0$  Hz, 1H), 7.25 (d,  $J = 8.0$  Hz, 2H), 7.08 (d,  $J = 8.0$  Hz, 2H), 3.79-3.68 (m, 1H), 2.72-2.62 (m, 1H), 2.56-2.45 (m, 1H), 2.31-2.17 (m, 2H);  $^{13}\text{C}$  NMR (100 MHz,  $\text{CDCl}_3$ )  $\delta$  161.3, 138.5, 136.24, 136.18, 133.5, 132.4, 130.6, 129.9, 129.7, 129.0, 125.1 (q,  $J_{\text{C-F}} = 279.0$  Hz), 117.1, 116.2, 71.1 (q,  $J_{\text{C-F}} = 28.0$  Hz), 30.8, 29.9;  $^{19}\text{F}$  NMR (376 MHz,  $\text{CDCl}_3$ )  $\delta$  -74.4 (d,  $J = 3.8$  Hz); HRMS Calcd for  $\text{C}_{18}\text{H}_{14}\text{Cl}_2\text{F}_3\text{N}_2$  (M+H): 385.0481; Found: 385.0483.

**Table 2, entry 6**

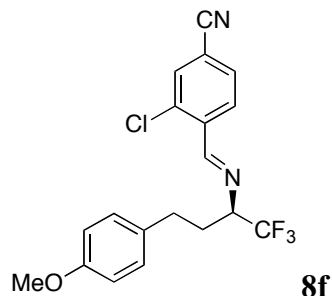

Colorless oil;  $[\alpha]_{\text{D}}^{20} = +178.8$  (*c* 1.13,  $\text{CHCl}_3$ ) (94% ee); IR (film) 2232, 1638  $\text{cm}^{-1}$ ;  $^1\text{H}$  NMR (400 MHz,  $\text{CDCl}_3$ )  $\delta$  8.64 (s, 1H), 8.22 (d,  $J = 8.4$  Hz, 1H), 7.72 (s, 1H), 7.60 (d,  $J = 8.4$  Hz, 1H), 7.07 (d,  $J = 8.4$  Hz, 2H), 6.83 (d,  $J = 8.4$  Hz, 2H), 3.82-3.68 (m, 4H), 2.72-2.61 (m, 1H), 2.51-2.40 (m, 1H), 2.31-2.15 (m, 2H);  $^{13}\text{C}$  NMR (100 MHz,  $\text{CDCl}_3$ )  $\delta$  161.2, 158.4, 136.4, 136.2, 133.5, 131.8, 130.6, 129.7, 129.5, 125.2 (q,  $J_{\text{C-F}} = 279.0$  Hz), 117.2, 116.1, 114.3, 71.1 (q,  $J_{\text{C-F}} = 28.0$  Hz), 55.4, 30.4, 30.1;  $^{19}\text{F}$  NMR (376 MHz,  $\text{CDCl}_3$ )  $\delta$  -74.4 (d,  $J = 7.5$  Hz); HRMS Calcd for  $\text{C}_{19}\text{H}_{17}\text{ClF}_3\text{N}_2\text{O}$  (M+H): 381.0976; Found: 381.0978.

**Table 2, entry 7**

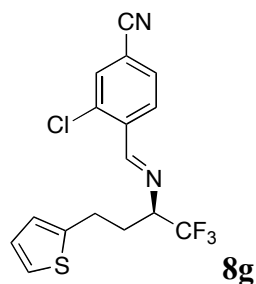

Yellow oil;  $[\alpha]_D^{20} = +155.5$  (*c* 1.04, CHCl<sub>3</sub>) (91% ee); IR (film); 2233, 1640 cm<sup>-1</sup>; <sup>1</sup>H NMR (400 MHz, CDCl<sub>3</sub>) δ 8.68 (s, 1H), 8.23 (d, *J* = 8.4 Hz, 1H), 7.73 (d, *J* = 1.2 Hz, 1H), 7.62 (d, *J* = 8.0 Hz, 1H), 7.18-7.13 (m, 1H), 6.97-6.91 (m, 1H), 6.80 (d, *J* = 3.2 Hz, 1H), 3.87-3.75 (m, 1H), 2.98-2.88 (m, 1H), 2.81-2.70 (m, 1H), 2.38-2.23 (m, 2H); <sup>13</sup>C NMR (100 MHz, CDCl<sub>3</sub>) δ 161.5, 142.5, 136.3, 136.2, 133.5, 130.6, 129.7, 127.2, 125.14 (q, *J*<sub>C-F</sub> = 279.0 Hz), 125.08, 124.0, 117.1, 116.2, 70.6 (q, *J*<sub>C-F</sub> = 28.0 Hz), 30.3, 25.4; <sup>19</sup>F NMR (376 MHz, CDCl<sub>3</sub>) δ -74.4 (d, *J* = 7.5 Hz); HRMS Calcd for C<sub>16</sub>H<sub>13</sub>ClF<sub>3</sub>N<sub>2</sub>S (M+H): 357.0435; Found: 357.0438.

**Table 2, entry 8**

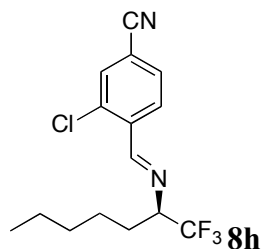

Colorless oil;  $[\alpha]_D^{20} = +118.4$  (*c* 0.99, CHCl<sub>3</sub>) (94% ee); IR (film) 2234, 1643 cm<sup>-1</sup>; <sup>1</sup>H NMR (400 MHz, CDCl<sub>3</sub>) δ 8.70 (s, 1H), 8.20 (d, *J* = 8.4 Hz, 1H), 7.69 (s, 1H), 7.59 (d, *J* = 8.0 Hz, 1H), 3.79-3.67 (m, 1H), 1.96-1.79 (m, 2H), 1.37-1.15 (m, 6H), 0.86 (t, *J* = 6.4 Hz, 3H); <sup>13</sup>C NMR (100 MHz, CDCl<sub>3</sub>) δ 160.4, 136.5, 136.1, 133.4, 130.6, 129.7, 125.3 (q, *J*<sub>C-F</sub> = 279.0 Hz), 117.1, 116.0, 72.1 (q, *J*<sub>C-F</sub> = 28.0 Hz), 31.3, 28.8, 25.0, 22.5, 14.0; <sup>19</sup>F NMR (376 MHz, CDCl<sub>3</sub>) δ -74.6 (d, *J* = 7.5 Hz); HRMS Calcd for C<sub>15</sub>H<sub>17</sub>ClF<sub>3</sub>N<sub>2</sub> (M+H): 317.1027; Found: 317.1027.

**Table 2, entry 9**

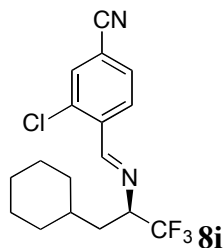

White solid; mp. 71-72 °C;  $[\alpha]_D^{20} = +135.7$  (*c* 1.12, CHCl<sub>3</sub>) (94% ee); IR (film) 2234, 1643 cm<sup>-1</sup>; <sup>1</sup>H NMR (400 MHz, CDCl<sub>3</sub>) δ 8.70 (s, 1H), 8.20 (d, *J* = 8.0 Hz, 1H), 7.72 (s, 1H), 7.61 (d, *J* = 8.0 Hz, 1H), 3.94-3.83 (m, 1H), 1.88-1.60 (m, 7H), 1.24-1.10 (m, 4H), 1.08-0.96 (m, 1H), 0.96-0.84 (m, 1H); <sup>13</sup>C NMR (100 MHz, CDCl<sub>3</sub>) δ 160.5, 136.6, 136.1, 133.5, 130.7, 129.7, 125.4 (q, *J*<sub>C-F</sub> = 279.0 Hz), 117.2, 116.0, 69.4 (q, *J*<sub>C-F</sub> = 28.0 Hz), 36.0, 34.2, 33.1, 31.9, 26.5, 26.2, 26.0; <sup>19</sup>F NMR (376 MHz, CDCl<sub>3</sub>) δ -74.6 (d, *J* = 7.5 Hz); HRMS Calcd for C<sub>17</sub>H<sub>19</sub>ClF<sub>3</sub>N<sub>2</sub> (M+H): 343.1183; Found: 343.1183.

**Table 2, entry 10**

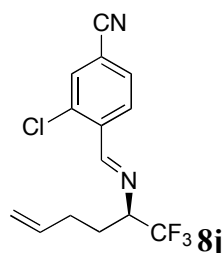

Colorless oil;  $[\alpha]_D^{20} = +133.6$  (*c* 1.25, CHCl<sub>3</sub>) (91% ee); IR (film) 2234, 1642 cm<sup>-1</sup>; <sup>1</sup>H NMR (400 MHz, CDCl<sub>3</sub>) δ 8.71 (s, 1H), 8.22 (d, *J* = 8.0 Hz, 1H), 7.72 (d, *J* = 1.2 Hz, 1H), 7.61 (d, *J* = 8.0 Hz, 1H), 5.81-5.69 (m, 1H), 5.10-5.01 (m, 2H), 3.86-3.75 (m, 1H), 2.19-2.09 (m, 1H), 2.05-1.90 (m, 3H); <sup>13</sup>C NMR (100 MHz, CDCl<sub>3</sub>) δ 161.1, 136.6, 136.4, 136.2, 133.5, 130.7, 129.8, 125.3 (q, *J*<sub>C-F</sub> = 281.0 Hz), 117.2, 116.6, 116.1, 71.1 (q, *J*<sub>C-F</sub> = 28.0 Hz), 29.2, 27.7; <sup>19</sup>F NMR (376 MHz, CDCl<sub>3</sub>) δ -74.5 (d, *J* = 7.5 Hz); HRMS Calcd for C<sub>14</sub>H<sub>13</sub>ClF<sub>3</sub>N<sub>2</sub> (M+H): 301.0714; Found: 301.0712.

**Table 2, entry 11**

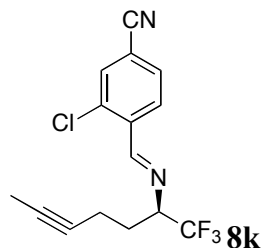

Colorless oil;  $[\alpha]_D^{20} = +275.1$  (*c* 1.01, CHCl<sub>3</sub>) (90% ee); IR (film) 2234, 1639 cm<sup>-1</sup>; <sup>1</sup>H NMR (400 MHz, CDCl<sub>3</sub>)  $\delta$  8.81 (s, 1H), 8.20 (d, *J* = 8.0 Hz, 1H), 7.70 (d, *J* = 1.2 Hz, 1H), 7.59 (d, *J* = 8.0 Hz, 1H), 4.09-3.98 (m, 1H), 2.32-2.22 (m, 1H), 2.11-1.90 (m, 3H), 1.80-1.75 (m, 3H); <sup>13</sup>C NMR (100 MHz, CDCl<sub>3</sub>)  $\delta$  161.5, 136.5, 136.3, 133.5, 130.6, 129.7, 125.3 (q, *J*<sub>C-F</sub> = 279.0 Hz), 117.1, 116.1, 78.1, 76.3, 70.2 (q, *J*<sub>C-F</sub> = 28.0 Hz), 27.5, 14.7, 3.5; <sup>19</sup>F NMR (376 MHz, CDCl<sub>3</sub>)  $\delta$  -74.4 (d, *J* = 3.8 Hz); HRMS Calcd for C<sub>15</sub>H<sub>13</sub>ClF<sub>3</sub>N<sub>2</sub> (M+H): 313.0714; Found: 313.0713.

#### Table 2, entry 12

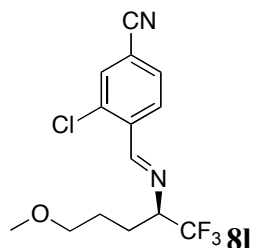

Colorless oil;  $[\alpha]_D^{20} = +94.1$  (*c* 1.00, CHCl<sub>3</sub>) (86% ee); IR (film) 2234, 1641 cm<sup>-1</sup>; <sup>1</sup>H NMR (400 MHz, CDCl<sub>3</sub>)  $\delta$  8.73 (s, 1H), 8.22 (d, *J* = 8.0 Hz, 1H), 7.71 (d, *J* = 1.2 Hz, 1H), 7.60 (d, *J* = 8.0 Hz, 1H), 3.87-3.76 (m, 1H), 3.46-3.36 (m, 2H), 3.32 (s, 3H), 2.09-1.88 (m, 2H), 1.58-1.46 (m, 2H); <sup>13</sup>C NMR (100 MHz, CDCl<sub>3</sub>)  $\delta$  160.9, 136.5, 136.2, 133.5, 130.6, 129.7, 125.2 (q, *J*<sub>C-F</sub> = 279.0 Hz), 117.2, 116.1, 72.20, 71.9 (q, *J*<sub>C-F</sub> = 28.0 Hz), 58.8, 26.2, 25.6; <sup>19</sup>F NMR (376 MHz, CDCl<sub>3</sub>)  $\delta$  -74.6 (d, *J* = 7.5 Hz); HRMS Calcd for C<sub>14</sub>H<sub>15</sub>ClF<sub>3</sub>N<sub>2</sub>O (M+H): 319.0820; Found: 319.0819.

#### Table 2, entry 13

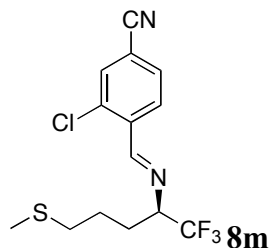

Yellow oil;  $[\alpha]_D^{20} = +116.7$  (*c* 1.03, CHCl<sub>3</sub>) (90% ee); IR (film) 2233, 1639 cm<sup>-1</sup>; <sup>1</sup>H NMR (400 MHz, CDCl<sub>3</sub>)  $\delta$  8.72 (s, 1H), 8.20 (d, *J* = 8.4 Hz, 1H), 7.71 (s, 1H), 7.60 (d, *J* = 8.0 Hz, 1H), 3.82-3.72 (m, 1H), 2.52 (t, *J* = 7.2 Hz, 2H), 2.11-1.92 (m, 5H), 1.65-1.47 (m, 2H); <sup>13</sup>C NMR (100 MHz, CDCl<sub>3</sub>)  $\delta$  160.8, 136.3, 136.1, 133.4, 130.6, 129.6, 125.0 (q, *J*<sub>C-F</sub> = 279.0 Hz), 117.0, 116.0, 71.7 (q, *J*<sub>C-F</sub> = 28.0 Hz), 33.7, 28.1, 24.9, 15.6; <sup>19</sup>F NMR (376 MHz, CDCl<sub>3</sub>)  $\delta$  -74.4 (d, *J* = 7.5 Hz); HRMS Calcd for C<sub>14</sub>H<sub>15</sub>ClF<sub>3</sub>N<sub>2</sub>S (M+H): 335.0591; Found: 335.0591.

**Table 2, entry 14**

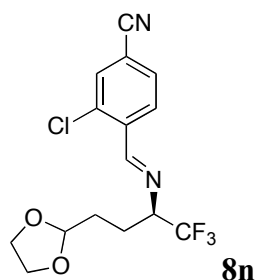

Yellow oil;  $[\alpha]_D^{20} = +95.1$  (*c* 0.99, CHCl<sub>3</sub>) (86% ee); IR (film) 2234, 1640, 1132 cm<sup>-1</sup>; <sup>1</sup>H NMR (400 MHz, CDCl<sub>3</sub>)  $\delta$  8.75 (s, 1H), 8.22 (d, *J* = 8.0 Hz, 1H), 7.71 (d, *J* = 1.6 Hz, 1H), 7.59 (d, *J* = 8.0 Hz, 1H), 4.89 (t, *J* = 4.4 Hz, 1H), 4.00-3.92 (m, 2H), 3.92-3.81 (m, 3H), 2.16-2.06 (m, 1H), 2.06-1.94 (m, 1H), 1.75-1.65 (m, 1H), 1.63-1.53 (m, 1H); <sup>13</sup>C NMR (100 MHz, CDCl<sub>3</sub>)  $\delta$  161.3, 136.5, 136.2, 133.5, 130.6, 129.8, 125.2 (q, *J*<sub>C-F</sub> = 280.0 Hz), 117.2, 116.1, 103.9, 71.4 (q, *J*<sub>C-F</sub> = 30.0 Hz), 65.3, 65.1, 29.3, 23.5; <sup>19</sup>F NMR (376 MHz, CDCl<sub>3</sub>)  $\delta$  -74.7 (d, *J* = 7.5 Hz); HRMS Calcd for C<sub>15</sub>H<sub>15</sub>ClF<sub>3</sub>N<sub>2</sub>O<sub>2</sub> (M+H): 347.0769; Found: 347.0770.

**Table 2, entry 15**

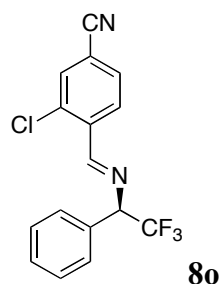

White solid; mp. 80-81 °C;  $[\alpha]_D^{20} = +93.5$  ( $c$  0.98,  $\text{CHCl}_3$ ) (67% ee); IR (film) 1638, 706  $\text{cm}^{-1}$ ;  $^1\text{H}$  NMR (400 MHz,  $\text{CDCl}_3$ )  $\delta$  8.83 (s, 1H), 8.34 (d,  $J = 8.0$  Hz, 1H), 7.70 (d,  $J = 1.2$  Hz, 1H), 7.63 (d,  $J = 8.4$  Hz, 2H), 7.57-7.50 (m, 2H), 7.46-7.37 (m, 3H), 4.92 (q,  $J = 7.6$  Hz, 1H);  $^{13}\text{C}$  NMR (100 MHz,  $\text{CDCl}_3$ )  $\delta$  161.3, 136.5, 136.4, 134.3, 133.5, 130.6, 129.8, 129.5, 129.0, 128.9, 124.5 (q,  $J_{\text{C-F}} = 280.0$  Hz), 117.2, 116.2, 75.4 (q,  $J_{\text{C-F}} = 29.0$  Hz);  $^{19}\text{F}$  NMR (376 MHz,  $\text{CDCl}_3$ )  $\delta$  -73.7 (d,  $J = 7.5$  Hz); HRMS Calcd for  $\text{C}_{16}\text{H}_{11}\text{ClF}_3\text{N}_2$  (M+H): 323.0557; Found: 323.0556.

### Preparation of 2-trifluoromethyltetrahydroquinoline (11) (Scheme 2)

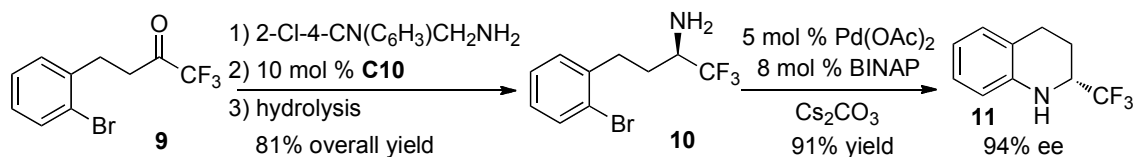

To a flask charged with 2-Cl-4-CN-benzylamine (0.625 g, 3.75 mmol) and 4 Å molecular sieves (1.20 g) were added  $\text{CHCl}_3$  (7.0 mL) and acetic acid (0.338 g, 5.63 mmol) under  $\text{N}_2$ . After the mixture was stirred at rt for 20 min, trifluoromethyl ketone **9** (0.703 g, 2.5 mmol) was added. The reaction mixture was refluxed for 5 h, cooled to rt, diluted with  $\text{Et}_2\text{O}$  (20 mL), filtered through a layer of silica gel (3 cm height) by suction, and washed with  $\text{Et}_2\text{O}$  (60 mL). The filtrate was concentrated, diluted with hexane/ $\text{Et}_2\text{O}$  = 7:1 (30 mL), filtered through a layer of silica gel (3 cm height) by suction again, washed with hexane/ $\text{Et}_2\text{O}$  = 7:1 (50 mL), and concentrated to give the corresponding ketimine as a white solid.

A mixture of the above ketimine and **C10** (0.190 g, 0.25 mmol) in benzene (2.5 mL) was stirred at 20 °C for 72 h, diluted with hexane/ $\text{Et}_2\text{O}$  = 7:1 (10 mL), filtered through a layer of silica gel (3 cm height) by suction, washed with hexane/ $\text{Et}_2\text{O}$  = 7:1 (60 mL), and concentrated to a residue, which was dissolved in  $\text{Et}_2\text{O}$  (12.5 mL), followed by the addition of ethylene glycol (25.0 mL) and 6N HCl (25.0 mL). The reaction mixture was stirred at rt

for 4 h and washed with Et<sub>2</sub>O (2 x 10 mL). The organic phase was extracted with 2N HCl (10 mL). The combined aqueous phase was diluted with water (100 mL) and washed with Et<sub>2</sub>O (4 x 30 mL). The organic phase was extracted with 2N HCl (30 mL), and the aqueous phase was washed with Et<sub>2</sub>O (2 x 20 mL). The above aqueous phases were combined, and CH<sub>2</sub>Cl<sub>2</sub> (20 mL) was added. The mixture was brought to pH 10 with solid Na<sub>2</sub>CO<sub>3</sub>, extracted with CH<sub>2</sub>Cl<sub>2</sub> (5 x 40 mL), dried over Na<sub>2</sub>SO<sub>4</sub>, filtered, concentrated, and purified by flash chromatography (silica gel, hexane/Et<sub>2</sub>O = 5/1) to give amine **10** as a colorless oil (0.566 g, 81% overall yield).  $[\alpha]_D^{20} = +29.2$  (*c* 1.14, CHCl<sub>3</sub>); IR (film) 3407, 1623 cm<sup>-1</sup>; <sup>1</sup>H NMR (400 MHz, CDCl<sub>3</sub>) δ 7.54 (d, *J* = 7.6 Hz, 1H), 7.27-7.21 (m, 2H), 7.11-7.04 (m, 1H), 3.20-3.01 (m, 2H), 2.88-2.78 (m, 1H), 2.11-2.00 (m, 1H), 1.72-1.61 (m, 1H), 1.39 (s, 2H); <sup>13</sup>C NMR (100 MHz, CDCl<sub>3</sub>) δ 140.5, 133.2, 130.6, 128.2, 127.8, 126.9 (q, *J*<sub>C-F</sub> = 280.0 Hz), 124.6, 53.6 (q, *J*<sub>C-F</sub> = 29.0 Hz), 32.4, 30.1; <sup>19</sup>F NMR (376 MHz, CDCl<sub>3</sub>) δ -78.9 (d, *J* = 7.9 Hz); HRMS Calcd for C<sub>10</sub>H<sub>12</sub>BrF<sub>3</sub>N (M+H): 282.0100; Found: 282.0098.

To a flask charged with Pd(OAc)<sub>2</sub> (0.006 g, 0.025 mmol), BINAP (0.025 g, 0.04 mmol) and Cs<sub>2</sub>CO<sub>3</sub> (0.228 g, 0.7 mmol) was added a solution of amine **10** (0.141 g, 0.5 mmol) in toluene (5 mL) under N<sub>2</sub>.<sup>1</sup> Upon stirring at reflux until the reaction was completed as judged by TLC (around 4 h), the reaction mixture was filtered through Celite, concentrated, and purified by flash chromatography (silica gel, hexane/Et<sub>2</sub>O = 20/1) to give compound **11** as a white solid (0.092 g, 91% yield). mp. 54-55 °C;  $[\alpha]_D^{20} = -24.4$  (*c* 1.05, CHCl<sub>3</sub>) (94% ee); IR (film) 3415, 1611 cm<sup>-1</sup>; <sup>1</sup>H NMR (400 MHz, CDCl<sub>3</sub>) δ 7.07-6.97 (m, 2H), 6.74-6.68 (m, 1H), 6.59 (d, *J* = 8.0 Hz, 1H), 4.08 (br s, 1H), 3.92-3.81 (m, 1H), 2.82 (t, *J* = 6.8 Hz, 2H), 2.17-2.04 (m, 2H); <sup>13</sup>C NMR (100 MHz, CDCl<sub>3</sub>) δ 142.2, 129.2, 127.4, 126.0 (q, *J*<sub>C-F</sub> = 279.0 Hz), 120.9, 118.6, 114.8, 53.0 (q, *J*<sub>C-F</sub> = 30.0 Hz), 24.5, 21.0; <sup>19</sup>F NMR (376 MHz, CDCl<sub>3</sub>) δ -77.6 (d, *J* = 7.5 Hz); HRMS Calcd for C<sub>10</sub>H<sub>11</sub>F<sub>3</sub>N (M+H): 202.0838; Found: 202.0835.

1) A. S. Guram and S. L. Buckwald, *J. Am. Chem. Soc.*, 1994, **116**, 7901.



## The chromatograms for determination of enantioselectivity

Table 2, entry 1

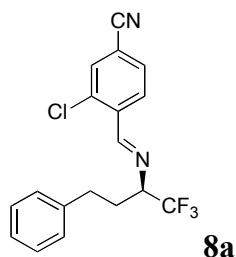

**HPLC Condition:** Column: Chiralpak AD-H, Daicel Chemical Industries, Ltd.;  
**Eluent:** Hexanes/IPA (95/5); **Flow rate:** 0.5 mL/min; **Detection:** UV215 nm;  
25°C.

**Racemic standard**

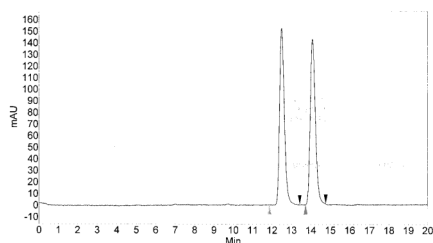

| Index | Time [Min] | Area [%] | Start [Min] | End [Min] |
|-------|------------|----------|-------------|-----------|
| 1     | 12.52      | 49.866   | 11.87       | 13.43     |
| 2     | 14.11      | 50.134   | 13.73       | 14.77     |
| Total |            | 100.000  |             |           |

**Enantio-enriched product**

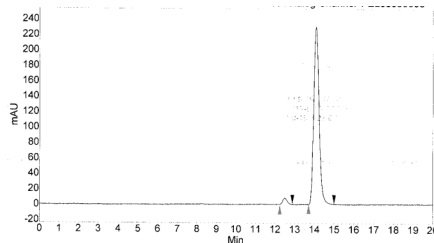

| Index | Time [Min] | Area [%] | Start [Min] | End [Min] |
|-------|------------|----------|-------------|-----------|
| 1     | 12.49      | 2.890    | 12.24       | 12.88     |
| 2     | 14.08      | 97.110   | 13.71       | 15.00     |
| Total |            | 100.000  |             |           |

Table 2, entry 2

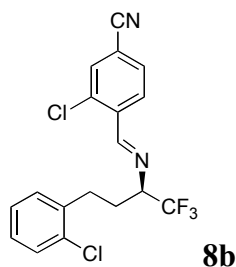

**HPLC Condition:** Column: Chiralcel OD-H, Daicel Chemical Industries, Ltd.; **Eluent:**  
Hexanes/IPA (95/5); **Flow rate:** 0.5 mL/min; **Detection:** UV215 nm; 25°C.

**Racemic standard**

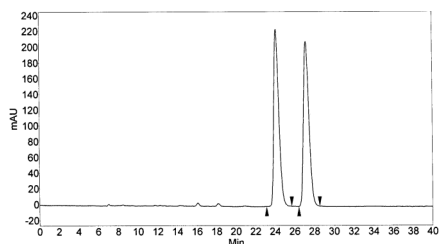

| Index | Time [Min] | Area [%] | Start [Min] | End [Min] |
|-------|------------|----------|-------------|-----------|
| 1     | 24.15      | 49.781   | 23.13       | 25.69     |
| 2     | 27.20      | 50.239   | 26.42       | 28.54     |
| Total |            | 100.000  |             |           |

**Enantio-enriched product**

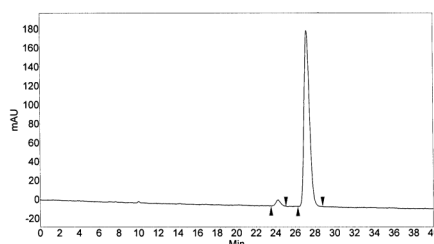

| Index | Time [Min] | Area [%] | Start [Min] | End [Min] |
|-------|------------|----------|-------------|-----------|
| 1     | 24.25      | 3.004    | 23.53       | 25.04     |
| 2     | 27.19      | 96.996   | 26.27       | 28.78     |
| Total |            | 100.000  |             |           |

Table 2, entry 3

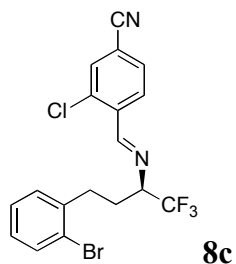

**HPLC Condition:** Column: Chiralcel OD-H, Daicel Chemical Industries, Ltd.; **Eluent:** Hexanes/IPA (95/5); **Flow rate:** 0.5 mL/min; **Detection:** UV215 nm; 25°C.

**Racemic standard**

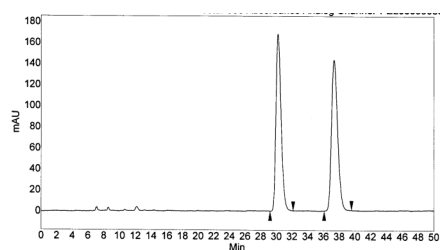

| Index | Time [Min] | Area [%] | Start [Min] | End [Min] |
|-------|------------|----------|-------------|-----------|
| 1     | 30.21      | 49.917   | 29.20       | 32.15     |
| 2     | 37.33      | 50.083   | 36.08       | 39.55     |
| Total |            | 100.000  |             |           |

**Enantio-enriched product**

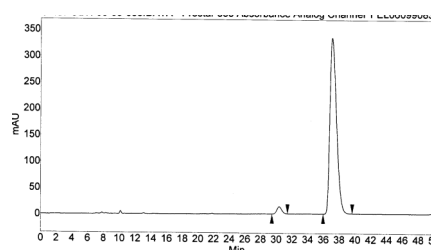

| Index | Time [Min] | Area [%] | Start [Min] | End [Min] |
|-------|------------|----------|-------------|-----------|
| 1     | 30.39      | 2.841    | 29.44       | 31.43     |
| 2     | 37.09      | 97.059   | 35.96       | 39.63     |
| Total |            | 100.000  |             |           |

Table 2, entry 4

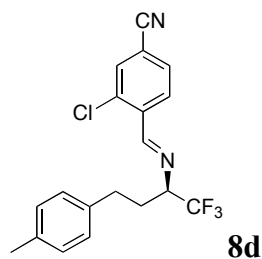

**HPLC Condition:** Column: Chiralpak AD-H, Daicel Chemical Industries, Ltd.; **Eluent:** Hexanes/IPA (95/5); **Flow rate:** 0.5 mL/min; **Detection:** UV215 nm; 25°C.

**Racemic standard**

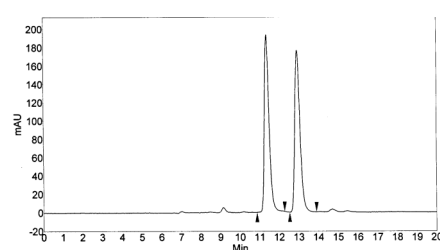

| Index | Time [Min] | Area [%] | Start [Min] | End [Min] |
|-------|------------|----------|-------------|-----------|
| 1     | 11.37      | 49.717   | 10.87       | 12.28     |
| 2     | 12.93      | 50.283   | 12.54       | 13.91     |
| Total |            | 100.000  |             |           |

**Enantio-enriched product**

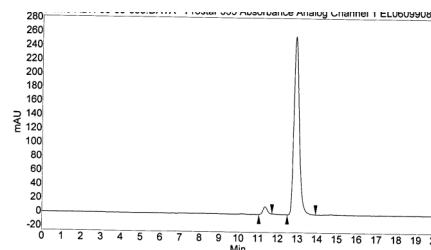

| Index | Time [Min] | Area [%] | Start [Min] | End [Min] |
|-------|------------|----------|-------------|-----------|
| 1     | 11.35      | 3.235    | 11.04       | 11.71     |
| 2     | 12.91      | 96.765   | 12.48       | 13.93     |
| Total |            | 100.000  |             |           |

**Table 2, entry 5**

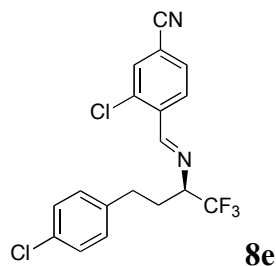

**HPLC Condition:** **Column:** Chiralpak AD-H, Daicel Chemical Industries, Ltd.;  
**Eluent:** Hexanes/IPA (95/5); **Flow rate:** 0.5 mL/min; **Detection:** UV215 nm;  
 25°C.

**Racemic standard**

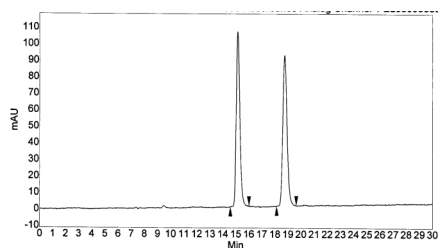

| Index | Time [Min] | Area % [%] | Start [Min] | End [Min] |
|-------|------------|------------|-------------|-----------|
| 1     | 15.15      | 49.886     | 14.57       | 16.01     |
| 2     | 18.75      | 50.114     | 18.13       | 19.64     |
| Total |            | 100.000    |             |           |

**Enantio-enriched product**

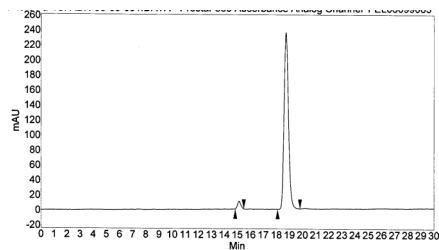

| Index | Time [Min] | Area % [%] | Start [Min] | End [Min] |
|-------|------------|------------|-------------|-----------|
| 2     | 15.13      | 3.265      | 14.83       | 15.50     |
| 1     | 18.73      | 96.735     | 18.10       | 19.61     |
| Total |            | 100.000    |             |           |

**Table 2, entry 6**

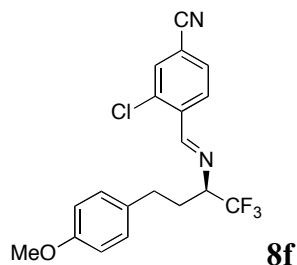

**HPLC Condition:** **Column:** Chiralpak AD-H, Daicel Chemical Industries, Ltd.;  
**Eluent:** Hexanes/IPA (95/5); **Flow rate:** 0.5 mL/min; **Detection:** UV215 nm;  
 25°C.

**Racemic standard**

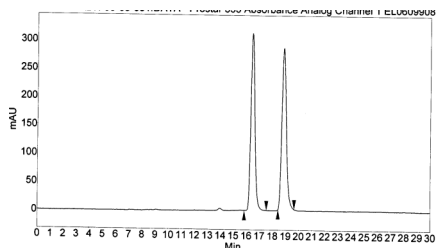

| Index | Time [Min] | Area % [%] | Start [Min] | End [Min] |
|-------|------------|------------|-------------|-----------|
| 1     | 16.43      | 49.803     | 15.83       | 17.53     |
| 2     | 18.83      | 50.197     | 18.42       | 19.64     |
| Total |            | 100.000    |             |           |

**Enantio-enriched product**

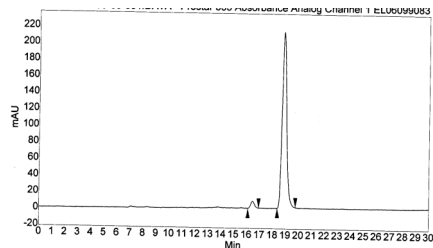

| Index | Time [Min] | Area % [%] | Start [Min] | End [Min] |
|-------|------------|------------|-------------|-----------|
| 2     | 16.47      | 3.184      | 16.10       | 16.94     |
| 1     | 18.85      | 96.816     | 18.37       | 19.77     |
| Total |            | 100.000    |             |           |

**Table 2, entry 7**

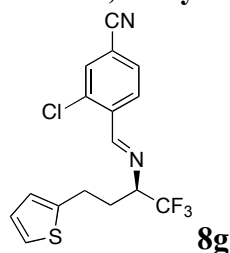

**HPLC Condition:** Column: Chiralpak AS-H, Daicel Chemical Industries, Ltd.; **Eluent:** Hexanes/IPA (95/5); **Flow rate:** 0.5 mL/min; **Detection:** UV215 nm; 25°C.

**Racemic standard**

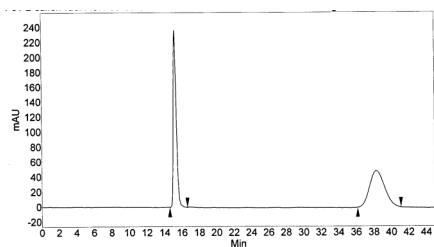

| Index | Time [Min] | Area [%] | Start [Min] | End [Min] |
|-------|------------|----------|-------------|-----------|
| 1     | 15.24      | 50.018   | 14.62       | 16.62     |
| 2     | 38.37      | 49.982   | 36.18       | 41.10     |
| Total |            | 100.000  |             |           |

**Enantio-enriched product**

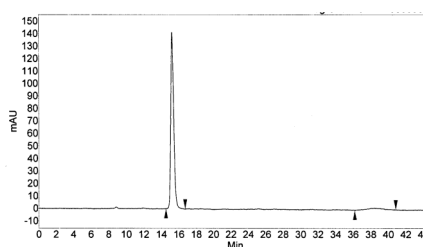

| Index | Time [Min] | Area [%] | Start [Min] | End [Min] |
|-------|------------|----------|-------------|-----------|
| 2     | 15.25      | 95.306   | 14.52       | 16.73     |
| 1     | 38.47      | 4.694    | 36.18       | 40.84     |
| Total |            | 100.000  |             |           |

**Table 2, entry 8**

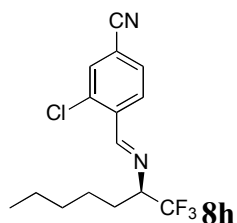

**HPLC Condition:** Column: Chiralpak AS-H, Daicel Chemical Industries, Ltd.; **Eluent:** Hexanes/IPA (95/5); **Flow rate:** 0.5 mL/min; **Detection:** UV215 nm; 25°C.

**Racemic standard**

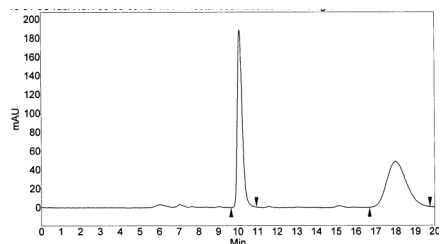

| Index | Time [Min] | Area [%] | Start [Min] | End [Min] |
|-------|------------|----------|-------------|-----------|
| 1     | 10.11      | 49.753   | 9.65        | 10.95     |
| 2     | 18.01      | 50.247   | 16.69       | 19.75     |
| Total |            | 100.000  |             |           |

**Enantio-enriched product**

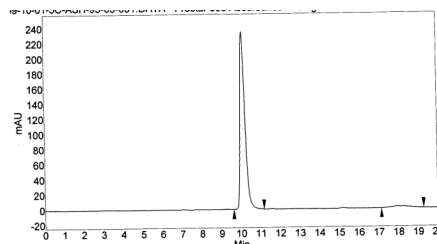

| Index | Time [Min] | Area [%] | Start [Min] | End [Min] |
|-------|------------|----------|-------------|-----------|
| 1     | 10.11      | 96.878   | 9.63        | 11.17     |
| 2     | 18.01      | 3.122    | 17.14       | 19.28     |
| Total |            | 100.000  |             |           |

Table 2, entry 9

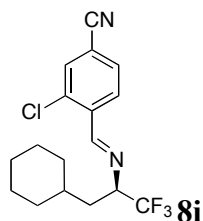

**HPLC Condition:** Column: Chiralpak AS-H, Daicel Chemical Industries, Ltd.; **Eluent:** Hexanes/IPA (85/15); **Flow rate:** 0.5 mL/min; **Detection:** UV215 nm; 25°C.

Racemic standard

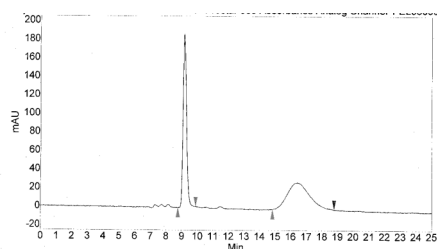

| Index | Time [Min] | Area %  | Start [Min] | End [Min] |
|-------|------------|---------|-------------|-----------|
| 1     | 9.17       | 49.935  | 8.75        | 9.88      |
| 2     | 16.44      | 50.065  | 14.84       | 18.78     |
| Total |            | 100.000 |             |           |

Enantio-enriched product

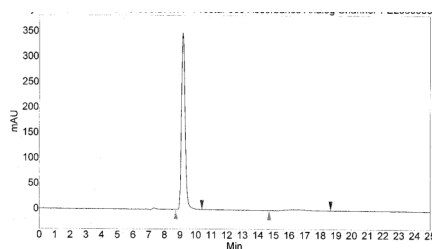

| Index | Time [Min] | Area %  | Start [Min] | End [Min] |
|-------|------------|---------|-------------|-----------|
| 1     | 9.17       | 98.998  | 8.72        | 10.40     |
| 2     | 16.28      | 3.002   | 14.72       | 18.65     |
| Total |            | 100.000 |             |           |

Table 2, entry 10

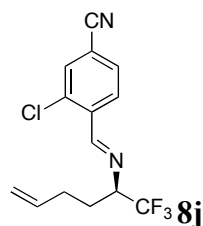

**HPLC Condition:** Column: Chiralpak AS-H, Daicel Chemical Industries, Ltd.; **Eluent:** Hexanes/IPA (95/5); **Flow rate:** 0.5 mL/min; **Detection:** UV215 nm; 25°C.

Racemic standard

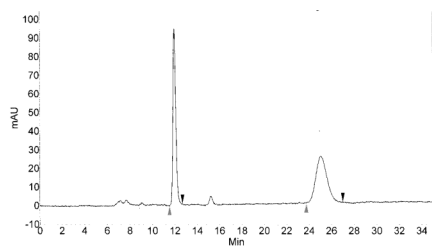

| Index | Time [Min] | Area %  | Start [Min] | End [Min] |
|-------|------------|---------|-------------|-----------|
| 1     | 11.96      | 49.819  | 11.52       | 12.68     |
| 2     | 25.03      | 50.181  | 23.75       | 27.00     |
| Total |            | 100.000 |             |           |

Enantio-enriched product

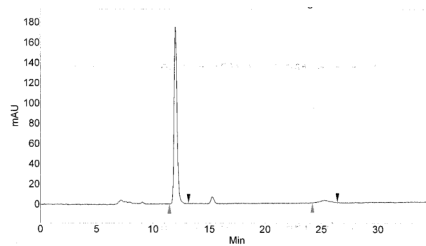

| Index | Time [Min] | Area %  | Start [Min] | End [Min] |
|-------|------------|---------|-------------|-----------|
| 1     | 12.00      | 95.472  | 11.45       | 13.15     |
| 2     | 25.45      | 4.528   | 24.21       | 26.43     |
| Total |            | 100.000 |             |           |

Table 2, entry 11

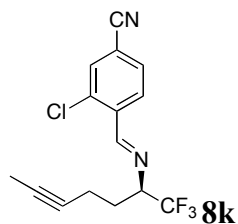

**HPLC Condition:** Column: Chiralpak AS-H, Daicel Chemical Industries, Ltd.; **Eluent:** Hexanes/IPA (95/5); **Flow rate:** 0.5 mL/min; **Detection:** UV215 nm; 25°C.

**Racemic standard**

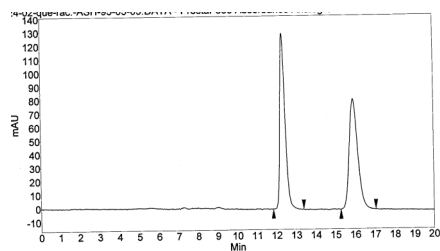

| Index | Time [Min] | Area [%] | Start [Min] | End [Min] |
|-------|------------|----------|-------------|-----------|
| 1     | 12.35      | 49.819   | 11.84       | 13.38     |
| 2     | 15.92      | 50.181   | 15.28       | 17.04     |
| Total |            | 100.000  |             |           |

**Enantio-enriched product**

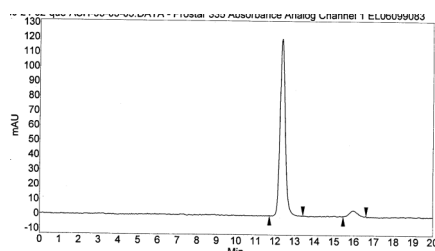

| Index | Time [Min] | Area [%] | Start [Min] | End [Min] |
|-------|------------|----------|-------------|-----------|
| 1     | 12.33      | 95.236   | 11.70       | 13.42     |
| 2     | 15.99      | 4.764    | 15.46       | 16.62     |
| Total |            | 100.000  |             |           |

Table 2, entry 12

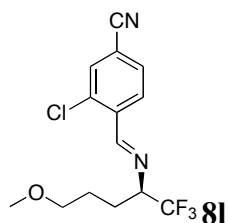

**HPLC Condition:** Column: Chiralpak AS-H, Daicel Chemical Industries, Ltd.; **Eluent:** Hexanes/IPA (95/5); **Flow rate:** 0.5 mL/min; **Detection:** UV215 nm; 25°C.

**Racemic standard**

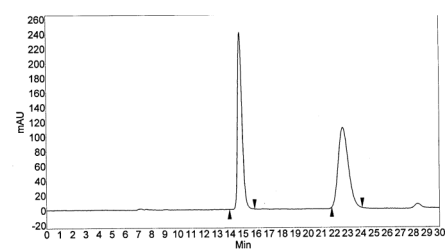

| Index | Time [Min] | Area [%] | Start [Min] | End [Min] |
|-------|------------|----------|-------------|-----------|
| 1     | 14.80      | 49.845   | 13.97       | 15.90     |
| 2     | 22.68      | 50.155   | 21.81       | 24.12     |
| Total |            | 100.000  |             |           |

**Enantio-enriched product**

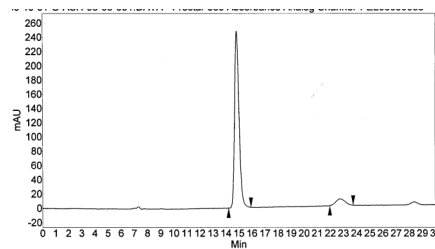

| Index | Time [Min] | Area [%] | Start [Min] | End [Min] |
|-------|------------|----------|-------------|-----------|
| 1     | 14.84      | 92.909   | 14.20       | 15.93     |
| 2     | 22.76      | 7.091    | 21.97       | 23.73     |
| Total |            | 100.000  |             |           |

**Table 2, entry 13**

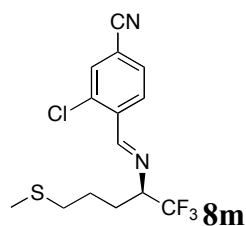

**HPLC Condition:** Column: Chiralcel OD-H, Daicel Chemical Industries, Ltd.; **Eluent:** Hexanes/IPA (95/05); **Flow rate:** 0.5 mL/min; **Detection:** UV215 nm; 25°C.

**Racemic standard**

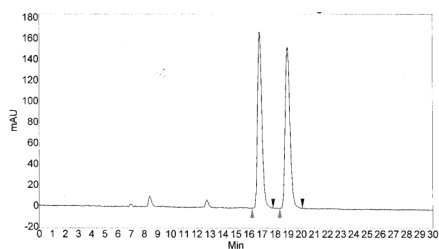

| Index | Time [Min] | Area [%] | Start [Min] | End [Min] |
|-------|------------|----------|-------------|-----------|
| 1     | 16.83      | 49.868   | 16.25       | 17.85     |
| 2     | 18.96      | 50.132   | 18.37       | 20.10     |
| Total |            | 100.000  |             |           |

**Enantio-enriched product**

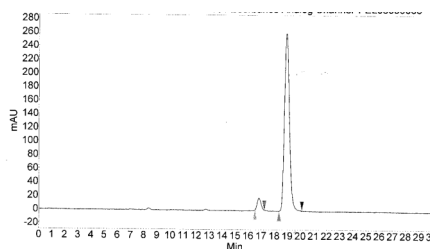

| Index | Time [Min] | Area [%] | Start [Min] | End [Min] |
|-------|------------|----------|-------------|-----------|
| 1     | 16.84      | 4.998    | 16.52       | 17.25     |
| 2     | 18.93      | 95.002   | 18.38       | 20.12     |
| Total |            | 100.000  |             |           |

**Table 2, entry 14**

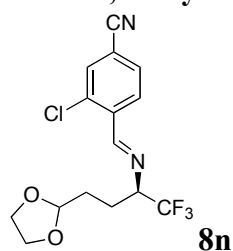

**HPLC Condition:** Column: Chiralpak AS-H, Daicel Chemical Industries, Ltd.; **Eluent:** Hexanes/IPA (95/5); **Flow rate:** 0.5 mL/min; **Detection:** UV215 nm; 25°C.

**Racemic standard**

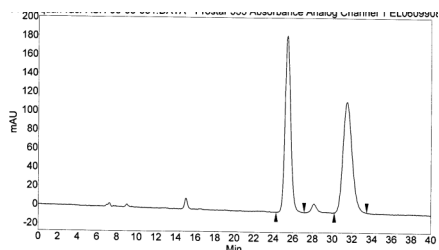

| Index | Time [Min] | Area [%] | Start [Min] | End [Min] |
|-------|------------|----------|-------------|-----------|
| 1     | 25.41      | 49.969   | 24.26       | 27.14     |
| 2     | 31.47      | 50.031   | 30.19       | 33.48     |
| Total |            | 100.000  |             |           |

**Enantio-enriched product**

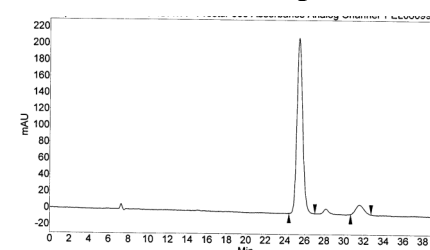

| Index | Time [Min] | Area [%] | Start [Min] | End [Min] |
|-------|------------|----------|-------------|-----------|
| 1     | 25.45      | 93.013   | 24.40       | 27.06     |
| 2     | 31.57      | 6.987    | 30.69       | 32.75     |
| Total |            | 100.000  |             |           |

Table 2, entry 15

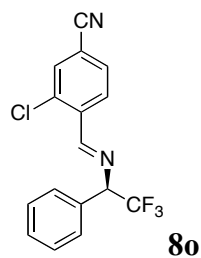

**HPLC Condition:** **Column:** Chiralpak AD-H, Daicel Chemical Industries, Ltd.; **Eluent:** Hexanes/IPA (95/5); **Flow rate:** 0.5 mL/min; **Detection:** UV215 nm; 25°C.

**Racemic standard**

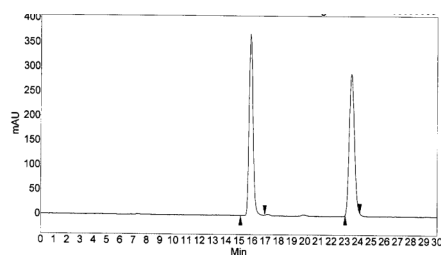

| Index | Time [Min] | Area [%] | Start [Min] | End [Min] |
|-------|------------|----------|-------------|-----------|
| 2     | 15.87      | 49.952   | 15.11       | 16.95     |
| 1     | 23.51      | 50.048   | 23.04       | 24.15     |
| Total |            | 100.000  |             |           |

**Enantio-enriched product**

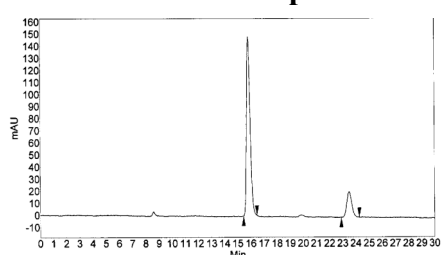

| Index | Time [Min] | Area [%] | Start [Min] | End [Min] |
|-------|------------|----------|-------------|-----------|
| 1     | 15.84      | 83.509   | 15.45       | 16.47     |
| 2     | 23.48      | 16.491   | 22.89       | 24.25     |
| Total |            | 100.000  |             |           |

Scheme 2

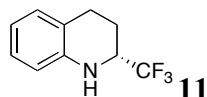

**HPLC Condition:** **Column:** Chiralcel OD-H, Daicel Chemical Industries, Ltd.; **Eluent:** Hexanes/IPA (90/10); **Flow rate:** 0.5 mL/min; **Detection:** UV209 nm; 25°C.

**Racemic standard**

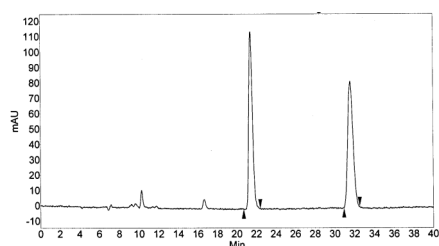

| Index | Time [Min] | Area [%] | Start [Min] | End [Min] |
|-------|------------|----------|-------------|-----------|
| 1     | 21.44      | 49.767   | 20.71       | 22.39     |
| 2     | 31.59      | 50.233   | 30.92       | 32.52     |
| Total |            | 100.000  |             |           |

**Enantio-enriched product**

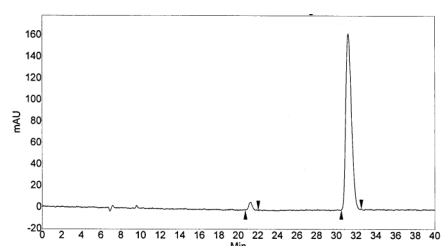

| Index | Time [Min] | Area [%] | Start [Min] | End [Min] |
|-------|------------|----------|-------------|-----------|
| 1     | 21.24      | 2.880    | 20.72       | 22.04     |
| 2     | 31.21      | 97.120   | 30.51       | 32.53     |
| Total |            | 100.000  |             |           |



### The X-ray structure of compound **7a**

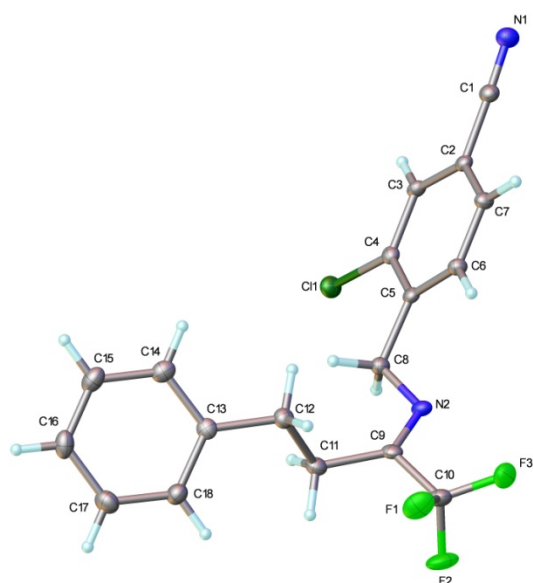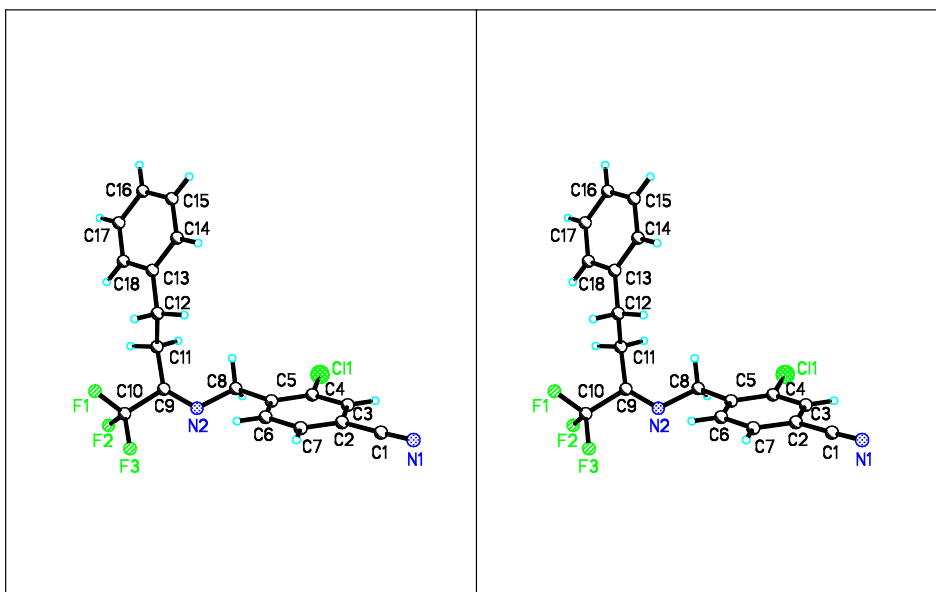

Table 1. Crystal data and structure refinement for a.

|                                   |                                                                                                                       |
|-----------------------------------|-----------------------------------------------------------------------------------------------------------------------|
| Identification code               | a                                                                                                                     |
| Empirical formula                 | C <sub>18</sub> H <sub>14</sub> Cl F <sub>3</sub> N <sub>2</sub>                                                      |
| Formula weight                    | 350.76                                                                                                                |
| Temperature                       | 173(2) K                                                                                                              |
| Wavelength                        | 0.71073 Å                                                                                                             |
| Crystal system, space group       | Monoclinic, P2(1)/c                                                                                                   |
| Unit cell dimensions              | a = 14.103(3) Å    alpha = 90 deg.<br>b = 7.6310(15) Å    beta = 114.36(3) deg.<br>c = 16.683(3) Å    gamma = 90 deg. |
| Volume                            | 1635.6(6) Å <sup>3</sup>                                                                                              |
| Z, Calculated density             | 4, 1.424 Mg/m <sup>3</sup>                                                                                            |
| Absorption coefficient            | 0.266 mm <sup>-1</sup>                                                                                                |
| F(000)                            | 720                                                                                                                   |
| Crystal size                      | 0.42 x 0.41 x 0.09 mm                                                                                                 |
| Theta range for data collection   | 1.59 to 25.00 deg.                                                                                                    |
| Limiting indices                  | -16<=h<=16, -9<=k<=9, -19<=l<=19                                                                                      |
| Reflections collected / unique    | 9557 / 2842 [R(int) = 0.0570]                                                                                         |
| Completeness to theta = 25.00     | 99.4 %                                                                                                                |
| Absorption correction             | Semi-empirical from equivalents                                                                                       |
| Max. and min. transmission        | 1.0000 and 0.5608                                                                                                     |
| Refinement method                 | Full-matrix least-squares on F <sup>2</sup>                                                                           |
| Data / restraints / parameters    | 2842 / 0 / 217                                                                                                        |
| Goodness-of-fit on F <sup>2</sup> | 1.219                                                                                                                 |
| Final R indices [I>2sigma(I)]     | R1 = 0.0654, wR2 = 0.2023                                                                                             |
| R indices (all data)              | R1 = 0.0938, wR2 = 0.2744                                                                                             |
| Largest diff. peak and hole       | 1.172 and -1.162 e.Å <sup>-3</sup>                                                                                    |

Table 2. Atomic coordinates ( $\times 10^4$ ) and equivalent isotropic displacement parameters ( $\text{\AA}^2 \times 10^3$ ) for a.

U(eq) is defined as one third of the trace of the orthogonalized  $U_{ij}$  tensor.

|       | x        | y        | z       | U(eq) |
|-------|----------|----------|---------|-------|
| Cl(1) | -1169(1) | 8013(1)  | 1115(1) | 31(1) |
| F(1)  | 4466(2)  | 7388(4)  | 4568(2) | 52(1) |
| F(2)  | 3419(2)  | 7800(4)  | 5196(1) | 54(1) |
| F(3)  | 3447(2)  | 5328(3)  | 4602(1) | 49(1) |
| N(1)  | -1256(2) | 978(4)   | -655(2) | 35(1) |
| N(2)  | 1914(2)  | 6730(4)  | 3258(2) | 25(1) |
| C(1)  | -860(3)  | 1983(4)  | -104(2) | 27(1) |
| C(2)  | -378(2)  | 3302(4)  | 571(2)  | 22(1) |
| C(3)  | -942(2)  | 4819(4)  | 534(2)  | 23(1) |
| C(4)  | -470(2)  | 6104(4)  | 1165(2) | 22(1) |
| C(5)  | 541(2)   | 5897(4)  | 1824(2) | 21(1) |
| C(6)  | 1079(2)  | 4378(4)  | 1821(2) | 23(1) |
| C(7)  | 633(3)   | 3069(4)  | 1196(2) | 24(1) |
| C(8)  | 1032(3)  | 7349(5)  | 2478(2) | 26(1) |
| C(9)  | 2668(3)  | 7751(5)  | 3648(2) | 25(1) |
| C(10) | 3503(3)  | 7043(5)  | 4500(2) | 32(1) |
| C(11) | 2853(3)  | 9590(5)  | 3417(2) | 28(1) |
| C(12) | 3386(3)  | 9596(5)  | 2774(2) | 29(1) |
| C(13) | 3553(2)  | 11414(5) | 2490(2) | 26(1) |
| C(14) | 3348(3)  | 11729(5) | 1608(2) | 32(1) |
| C(15) | 3529(3)  | 13366(6) | 1338(2) | 37(1) |
| C(16) | 3922(3)  | 14716(5) | 1929(2) | 37(1) |
| C(17) | 4128(3)  | 14425(5) | 2807(3) | 38(1) |
| C(18) | 3950(3)  | 12796(5) | 3083(2) | 31(1) |

Table 3. Bond lengths [Å] and angles [deg] for a.

---

|              |          |
|--------------|----------|
| Cl(1)-C(4)   | 1.740(3) |
| F(1)-C(10)   | 1.341(4) |
| F(2)-C(10)   | 1.346(4) |
| F(3)-C(10)   | 1.326(4) |
| N(1)-C(1)    | 1.150(5) |
| N(2)-C(9)    | 1.261(4) |
| N(2)-C(8)    | 1.459(4) |
| C(1)-C(2)    | 1.453(5) |
| C(2)-C(7)    | 1.388(5) |
| C(2)-C(3)    | 1.392(5) |
| C(3)-C(4)    | 1.391(4) |
| C(3)-H(3)    | 0.9500   |
| C(4)-C(5)    | 1.405(5) |
| C(5)-C(6)    | 1.387(5) |
| C(5)-C(8)    | 1.509(4) |
| C(6)-C(7)    | 1.392(4) |
| C(6)-H(6)    | 0.9500   |
| C(7)-H(7)    | 0.9500   |
| C(8)-H(8A)   | 0.9900   |
| C(8)-H(8B)   | 0.9900   |
| C(9)-C(11)   | 1.506(5) |
| C(9)-C(10)   | 1.522(5) |
| C(11)-C(12)  | 1.543(4) |
| C(11)-H(11B) | 0.9900   |
| C(11)-H(11A) | 0.9900   |
| C(12)-C(13)  | 1.516(5) |
| C(12)-H(12B) | 0.9900   |
| C(12)-H(12A) | 0.9900   |
| C(13)-C(18)  | 1.395(5) |
| C(13)-C(14)  | 1.397(5) |
| C(14)-C(15)  | 1.387(6) |
| C(14)-H(14)  | 0.9500   |
| C(15)-C(16)  | 1.375(6) |
| C(15)-H(15)  | 0.9500   |
| C(16)-C(17)  | 1.389(5) |
| C(16)-H(16)  | 0.9500   |
| C(17)-C(18)  | 1.384(6) |
| C(17)-H(17)  | 0.9500   |
| C(18)-H(18)  | 0.9500   |

|                     |          |
|---------------------|----------|
| C(9)-N(2)-C(8)      | 119.2(3) |
| N(1)-C(1)-C(2)      | 178.0(4) |
| C(7)-C(2)-C(3)      | 122.1(3) |
| C(7)-C(2)-C(1)      | 120.1(3) |
| C(3)-C(2)-C(1)      | 117.8(3) |
| C(2)-C(3)-C(4)      | 117.8(3) |
| C(2)-C(3)-H(3)      | 121.1    |
| C(4)-C(3)-H(3)      | 121.1    |
| C(3)-C(4)-C(5)      | 121.8(3) |
| C(3)-C(4)-Cl(1)     | 117.9(3) |
| C(5)-C(4)-Cl(1)     | 120.3(2) |
| C(6)-C(5)-C(4)      | 118.2(3) |
| C(6)-C(5)-C(8)      | 121.9(3) |
| C(4)-C(5)-C(8)      | 119.9(3) |
| C(5)-C(6)-C(7)      | 121.5(3) |
| C(5)-C(6)-H(6)      | 119.2    |
| C(7)-C(6)-H(6)      | 119.2    |
| C(2)-C(7)-C(6)      | 118.6(3) |
| C(2)-C(7)-H(7)      | 120.7    |
| C(6)-C(7)-H(7)      | 120.7    |
| N(2)-C(8)-C(5)      | 112.0(3) |
| N(2)-C(8)-H(8A)     | 109.2    |
| C(5)-C(8)-H(8A)     | 109.2    |
| N(2)-C(8)-H(8B)     | 109.2    |
| C(5)-C(8)-H(8B)     | 109.2    |
| H(8A)-C(8)-H(8B)    | 107.9    |
| N(2)-C(9)-C(11)     | 129.9(3) |
| N(2)-C(9)-C(10)     | 115.2(3) |
| C(11)-C(9)-C(10)    | 114.9(3) |
| F(3)-C(10)-F(1)     | 107.2(3) |
| F(3)-C(10)-F(2)     | 106.3(3) |
| F(1)-C(10)-F(2)     | 106.8(3) |
| F(3)-C(10)-C(9)     | 114.0(3) |
| F(1)-C(10)-C(9)     | 112.1(3) |
| F(2)-C(10)-C(9)     | 110.1(3) |
| C(9)-C(11)-C(12)    | 111.5(3) |
| C(9)-C(11)-H(11B)   | 109.3    |
| C(12)-C(11)-H(11B)  | 109.3    |
| C(9)-C(11)-H(11A)   | 109.3    |
| C(12)-C(11)-H(11A)  | 109.3    |
| H(11B)-C(11)-H(11A) | 108.0    |
| C(13)-C(12)-C(11)   | 113.8(3) |
| C(13)-C(12)-H(12B)  | 108.8    |
| C(11)-C(12)-H(12B)  | 108.8    |

|                     |          |
|---------------------|----------|
| C(13)-C(12)-H(12A)  | 108.8    |
| C(11)-C(12)-H(12A)  | 108.8    |
| H(12B)-C(12)-H(12A) | 107.7    |
| C(18)-C(13)-C(14)   | 117.7(3) |
| C(18)-C(13)-C(12)   | 122.6(3) |
| C(14)-C(13)-C(12)   | 119.7(3) |
| C(15)-C(14)-C(13)   | 120.7(4) |
| C(15)-C(14)-H(14)   | 119.6    |
| C(13)-C(14)-H(14)   | 119.6    |
| C(16)-C(15)-C(14)   | 121.0(3) |
| C(16)-C(15)-H(15)   | 119.5    |
| C(14)-C(15)-H(15)   | 119.5    |
| C(15)-C(16)-C(17)   | 119.0(4) |
| C(15)-C(16)-H(16)   | 120.5    |
| C(17)-C(16)-H(16)   | 120.5    |
| C(18)-C(17)-C(16)   | 120.4(4) |
| C(18)-C(17)-H(17)   | 119.8    |
| C(16)-C(17)-H(17)   | 119.8    |
| C(17)-C(18)-C(13)   | 121.2(3) |
| C(17)-C(18)-H(18)   | 119.4    |
| C(13)-C(18)-H(18)   | 119.4    |

---

Symmetry transformations used to generate equivalent atoms:

Table 4. Anisotropic displacement parameters ( $\text{Å}^2 \times 10^3$ ) for a.

The anisotropic displacement factor exponent takes the form:

$$-2 \pi^2 [ h^2 a^{*2} U_{11} + \dots + 2 h k a^* b^* U_{12} ]$$

|       | U11   | U22   | U33   | U23    | U13   | U12   |
|-------|-------|-------|-------|--------|-------|-------|
| Cl(1) | 31(1) | 28(1) | 33(1) | 1(1)   | 11(1) | 7(1)  |
| F(1)  | 28(1) | 79(2) | 40(1) | 4(1)   | 5(1)  | -4(1) |
| F(2)  | 66(2) | 69(2) | 21(1) | -12(1) | 12(1) | 8(1)  |
| F(3)  | 58(2) | 39(2) | 36(1) | 9(1)   | 6(1)  | 5(1)  |
| N(1)  | 38(2) | 35(2) | 30(2) | -4(1)  | 10(1) | -3(2) |
| N(2)  | 28(2) | 30(2) | 18(1) | -4(1)  | 10(1) | -5(1) |
| C(1)  | 31(2) | 29(2) | 23(2) | -1(1)  | 13(2) | -2(2) |
| C(2)  | 24(2) | 25(2) | 16(1) | 0(1)   | 9(1)  | -3(1) |
| C(3)  | 21(2) | 29(2) | 17(1) | 0(1)   | 6(1)  | -4(1) |
| C(4)  | 25(2) | 24(2) | 22(2) | 1(1)   | 14(1) | 0(1)  |
| C(5)  | 24(2) | 23(2) | 17(1) | 1(1)   | 11(1) | -2(1) |
| C(6)  | 22(2) | 26(2) | 20(1) | -2(1)  | 7(1)  | -2(1) |
| C(7)  | 26(2) | 24(2) | 22(2) | -3(1)  | 10(1) | 1(1)  |
| C(8)  | 28(2) | 24(2) | 23(2) | -1(1)  | 9(1)  | 0(2)  |
| C(9)  | 29(2) | 29(2) | 20(2) | -9(1)  | 13(1) | -4(2) |
| C(10) | 33(2) | 39(2) | 23(2) | -6(1)  | 9(2)  | -4(2) |
| C(11) | 29(2) | 27(2) | 28(2) | -6(1)  | 13(1) | -2(2) |
| C(12) | 30(2) | 27(2) | 31(2) | -1(1)  | 15(2) | 1(2)  |
| C(13) | 19(2) | 30(2) | 32(2) | 0(1)   | 15(1) | -1(1) |
| C(14) | 25(2) | 42(2) | 30(2) | 1(2)   | 11(2) | 1(2)  |
| C(15) | 30(2) | 50(2) | 32(2) | 11(2)  | 12(2) | 0(2)  |
| C(16) | 30(2) | 33(2) | 48(2) | 13(2)  | 17(2) | 2(2)  |
| C(17) | 36(2) | 35(2) | 43(2) | -7(2)  | 16(2) | -9(2) |
| C(18) | 32(2) | 35(2) | 27(2) | 2(1)   | 12(2) | -2(2) |

Table 5. Hydrogen coordinates ( $\times 10^4$ ) and isotropic displacement parameters ( $\text{Å}^2 \times 10^3$ ) for a.

|        | x     | y     | z    | U(eq) |
|--------|-------|-------|------|-------|
| H(3)   | -1627 | 4972  | 93   | 28    |
| H(6)   | 1769  | 4227  | 2255 | 28    |
| H(7)   | 1012  | 2039  | 1198 | 29    |
| H(8A)  | 1269  | 8286  | 2194 | 31    |
| H(8B)  | 503   | 7858  | 2658 | 31    |
| H(11B) | 3296  | 10224 | 3961 | 34    |
| H(11A) | 2179  | 10214 | 3145 | 34    |
| H(12B) | 4069  | 9003  | 3058 | 35    |
| H(12A) | 2955  | 8910  | 2245 | 35    |
| H(14)  | 3081  | 10812 | 1190 | 39    |
| H(15)  | 3379  | 13557 | 735  | 45    |
| H(16)  | 4051  | 15830 | 1740 | 44    |
| H(17)  | 4393  | 15351 | 3221 | 46    |
| H(18)  | 4101  | 12614 | 3687 | 38    |



Table 6. Torsion angles [deg] for a.

---

|                         |           |
|-------------------------|-----------|
| N(1)-C(1)-C(2)-C(7)     | -144(11)  |
| N(1)-C(1)-C(2)-C(3)     | 33(11)    |
| C(7)-C(2)-C(3)-C(4)     | -1.7(4)   |
| C(1)-C(2)-C(3)-C(4)     | -178.2(3) |
| C(2)-C(3)-C(4)-C(5)     | -0.2(4)   |
| C(2)-C(3)-C(4)-Cl(1)    | 179.4(2)  |
| C(3)-C(4)-C(5)-C(6)     | 1.6(4)    |
| Cl(1)-C(4)-C(5)-C(6)    | -178.0(2) |
| C(3)-C(4)-C(5)-C(8)     | 178.2(3)  |
| Cl(1)-C(4)-C(5)-C(8)    | -1.3(4)   |
| C(4)-C(5)-C(6)-C(7)     | -1.2(4)   |
| C(8)-C(5)-C(6)-C(7)     | -177.8(3) |
| C(3)-C(2)-C(7)-C(6)     | 2.0(5)    |
| C(1)-C(2)-C(7)-C(6)     | 178.5(3)  |
| C(5)-C(6)-C(7)-C(2)     | -0.5(5)   |
| C(9)-N(2)-C(8)-C(5)     | 147.4(3)  |
| C(6)-C(5)-C(8)-N(2)     | -21.5(4)  |
| C(4)-C(5)-C(8)-N(2)     | 162.0(3)  |
| C(8)-N(2)-C(9)-C(11)    | -3.0(5)   |
| C(8)-N(2)-C(9)-C(10)    | 174.7(3)  |
| N(2)-C(9)-C(10)-F(3)    | 15.1(4)   |
| C(11)-C(9)-C(10)-F(3)   | -166.8(3) |
| N(2)-C(9)-C(10)-F(1)    | 137.1(3)  |
| C(11)-C(9)-C(10)-F(1)   | -44.9(4)  |
| N(2)-C(9)-C(10)-F(2)    | -104.2(4) |
| C(11)-C(9)-C(10)-F(2)   | 73.8(4)   |
| N(2)-C(9)-C(11)-C(12)   | -86.6(4)  |
| C(10)-C(9)-C(11)-C(12)  | 95.7(3)   |
| C(9)-C(11)-C(12)-C(13)  | 177.7(3)  |
| C(11)-C(12)-C(13)-C(18) | 45.6(4)   |
| C(11)-C(12)-C(13)-C(14) | -137.2(3) |
| C(18)-C(13)-C(14)-C(15) | -0.4(5)   |
| C(12)-C(13)-C(14)-C(15) | -177.7(3) |
| C(13)-C(14)-C(15)-C(16) | 0.5(5)    |
| C(14)-C(15)-C(16)-C(17) | -0.7(6)   |
| C(15)-C(16)-C(17)-C(18) | 0.7(6)    |
| C(16)-C(17)-C(18)-C(13) | -0.6(6)   |
| C(14)-C(13)-C(18)-C(17) | 0.4(5)    |
| C(12)-C(13)-C(18)-C(17) | 177.7(3)  |

---

Symmetry transformations used to generate equivalent atoms:

Table 7. Hydrogen bonds for a [A and deg.].

---

|         |        |          |          |        |
|---------|--------|----------|----------|--------|
| D-H...A | d(D-H) | d(H...A) | d(D...A) | <(DHA) |
|---------|--------|----------|----------|--------|

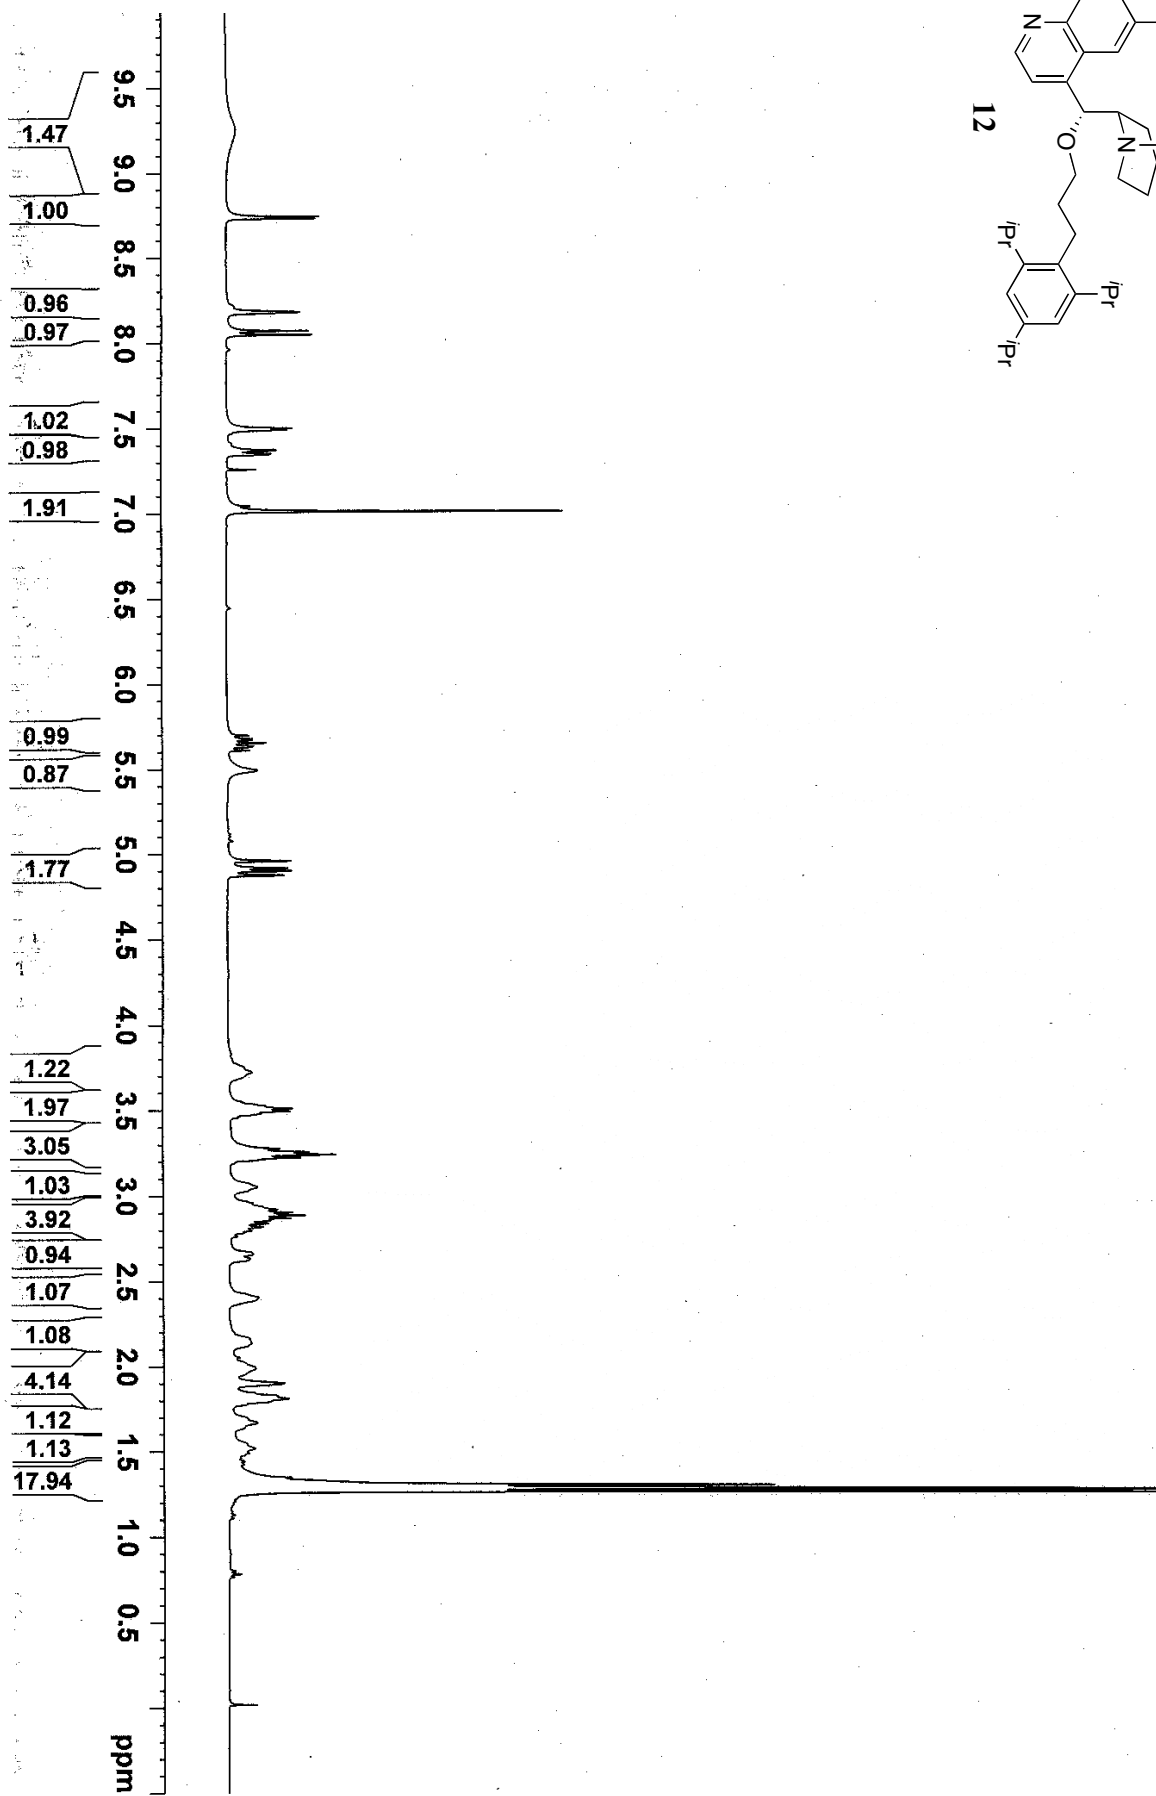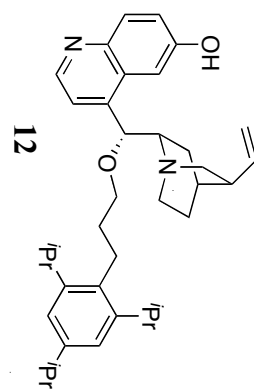

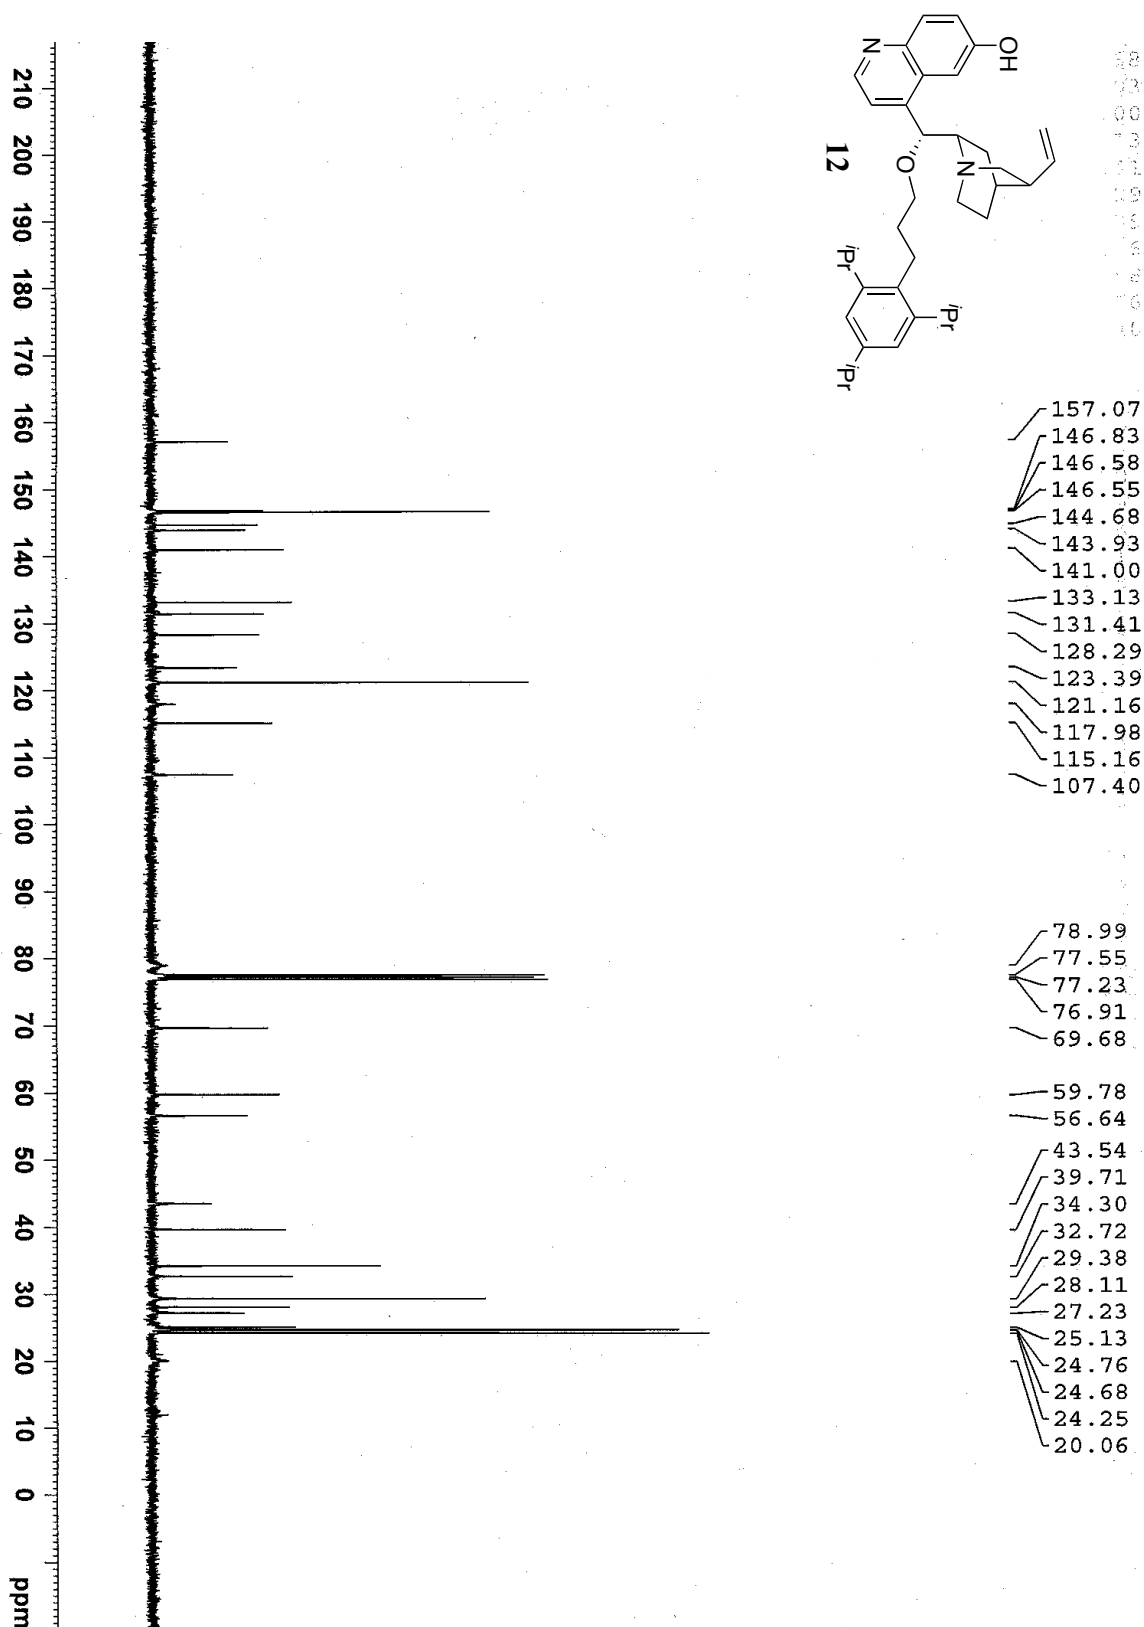

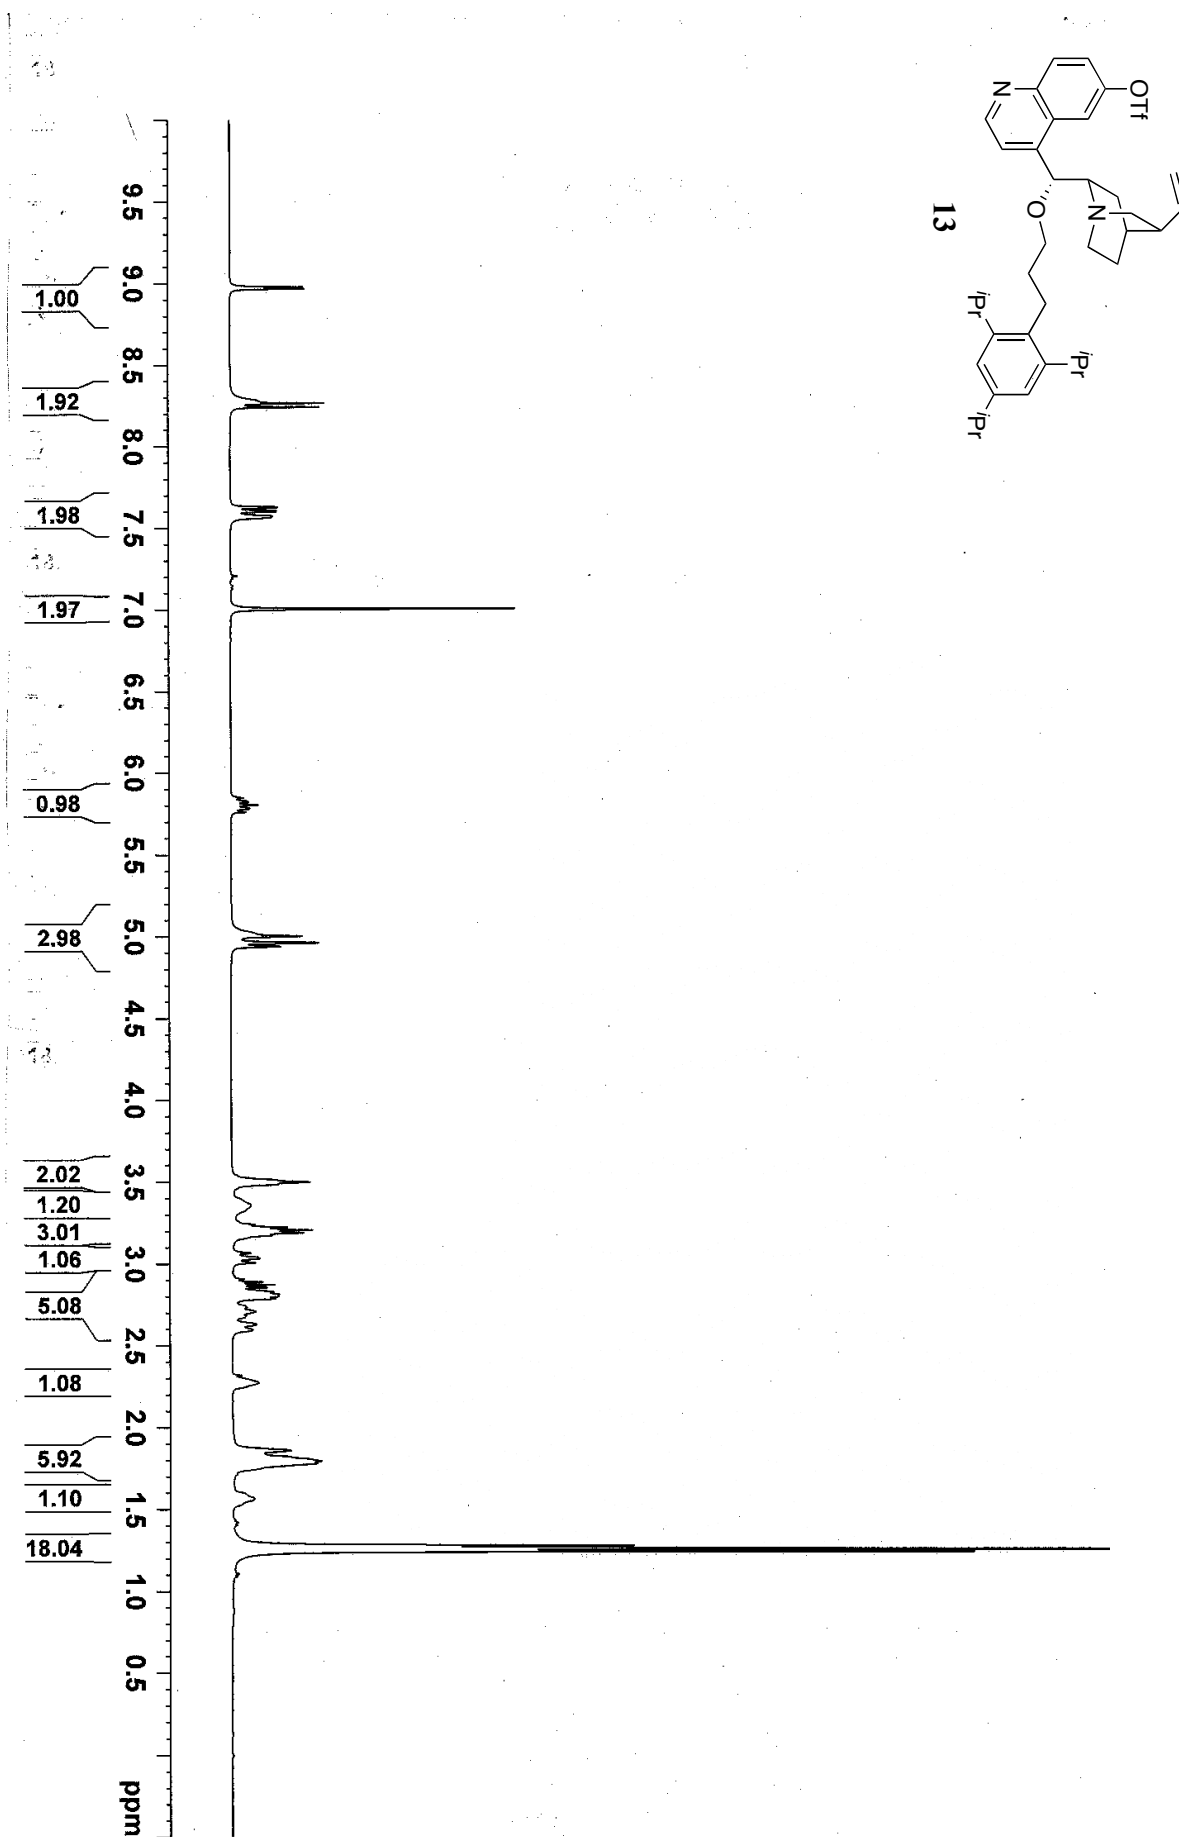

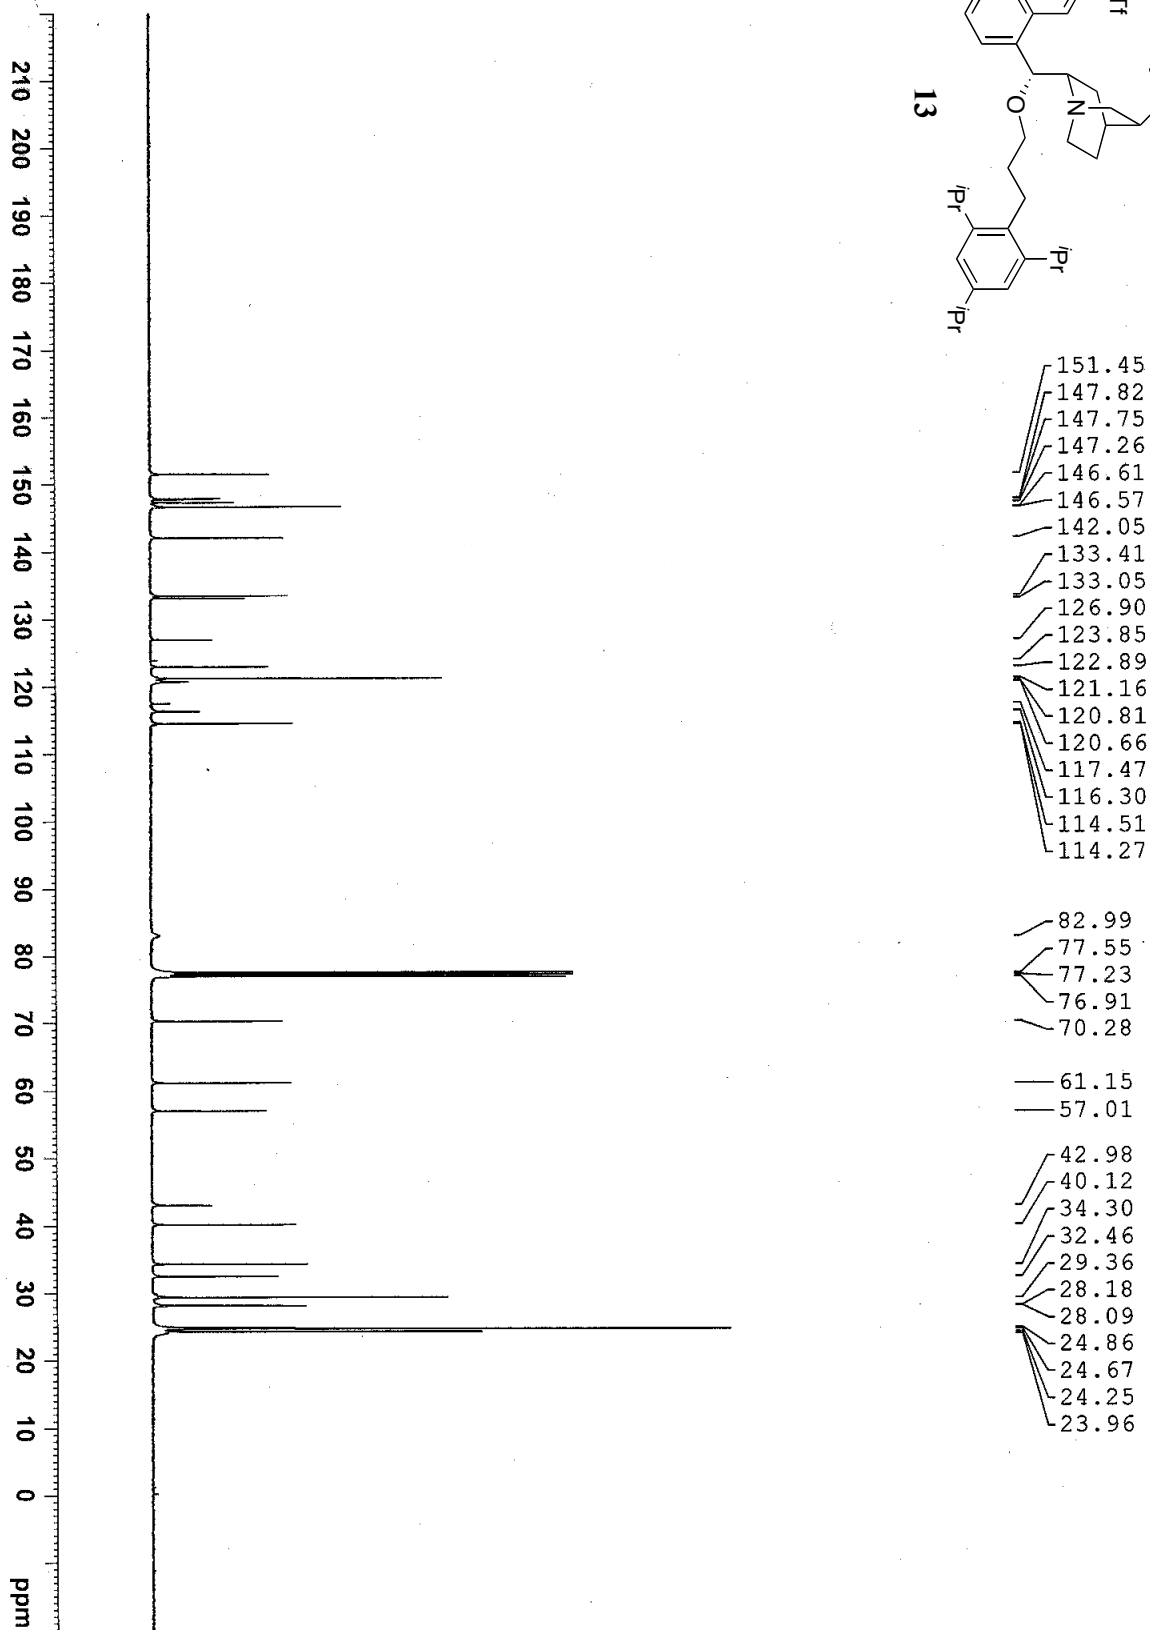

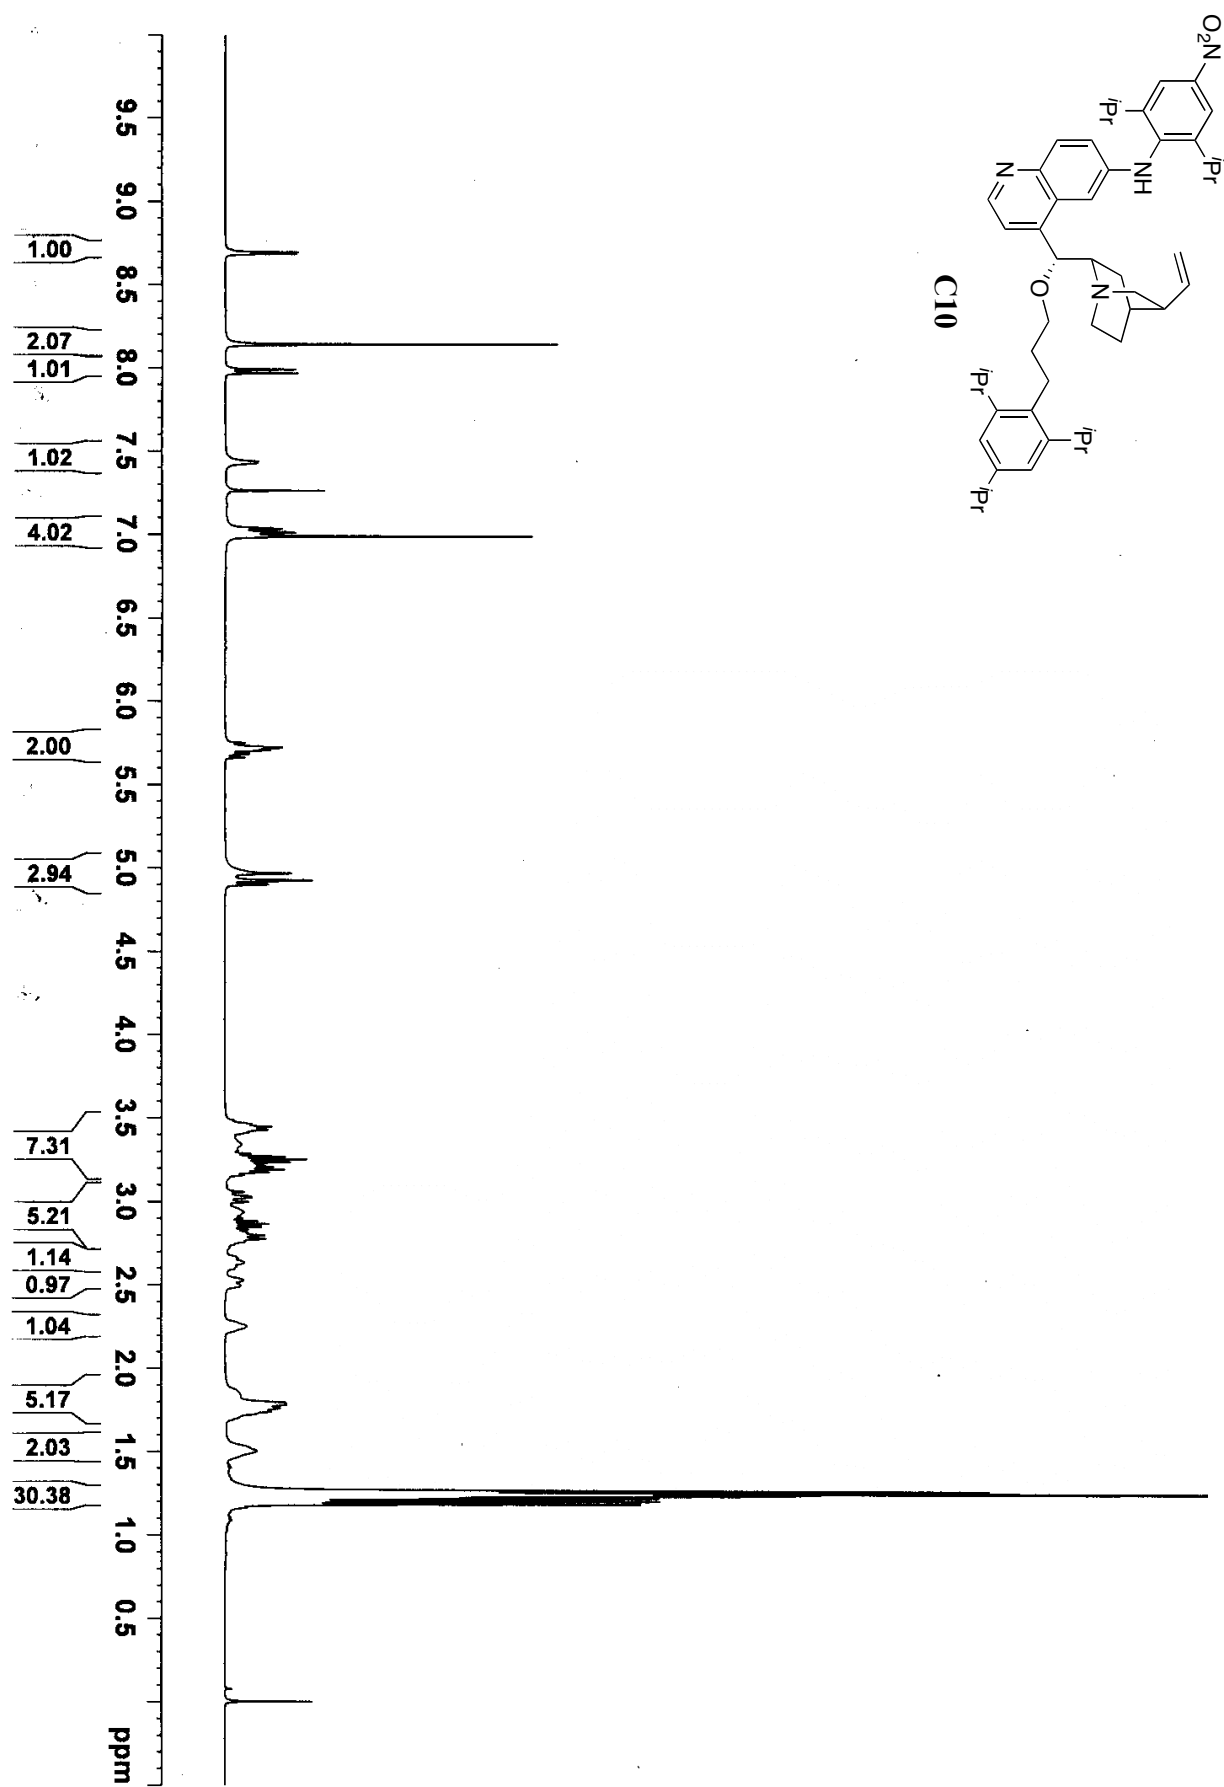

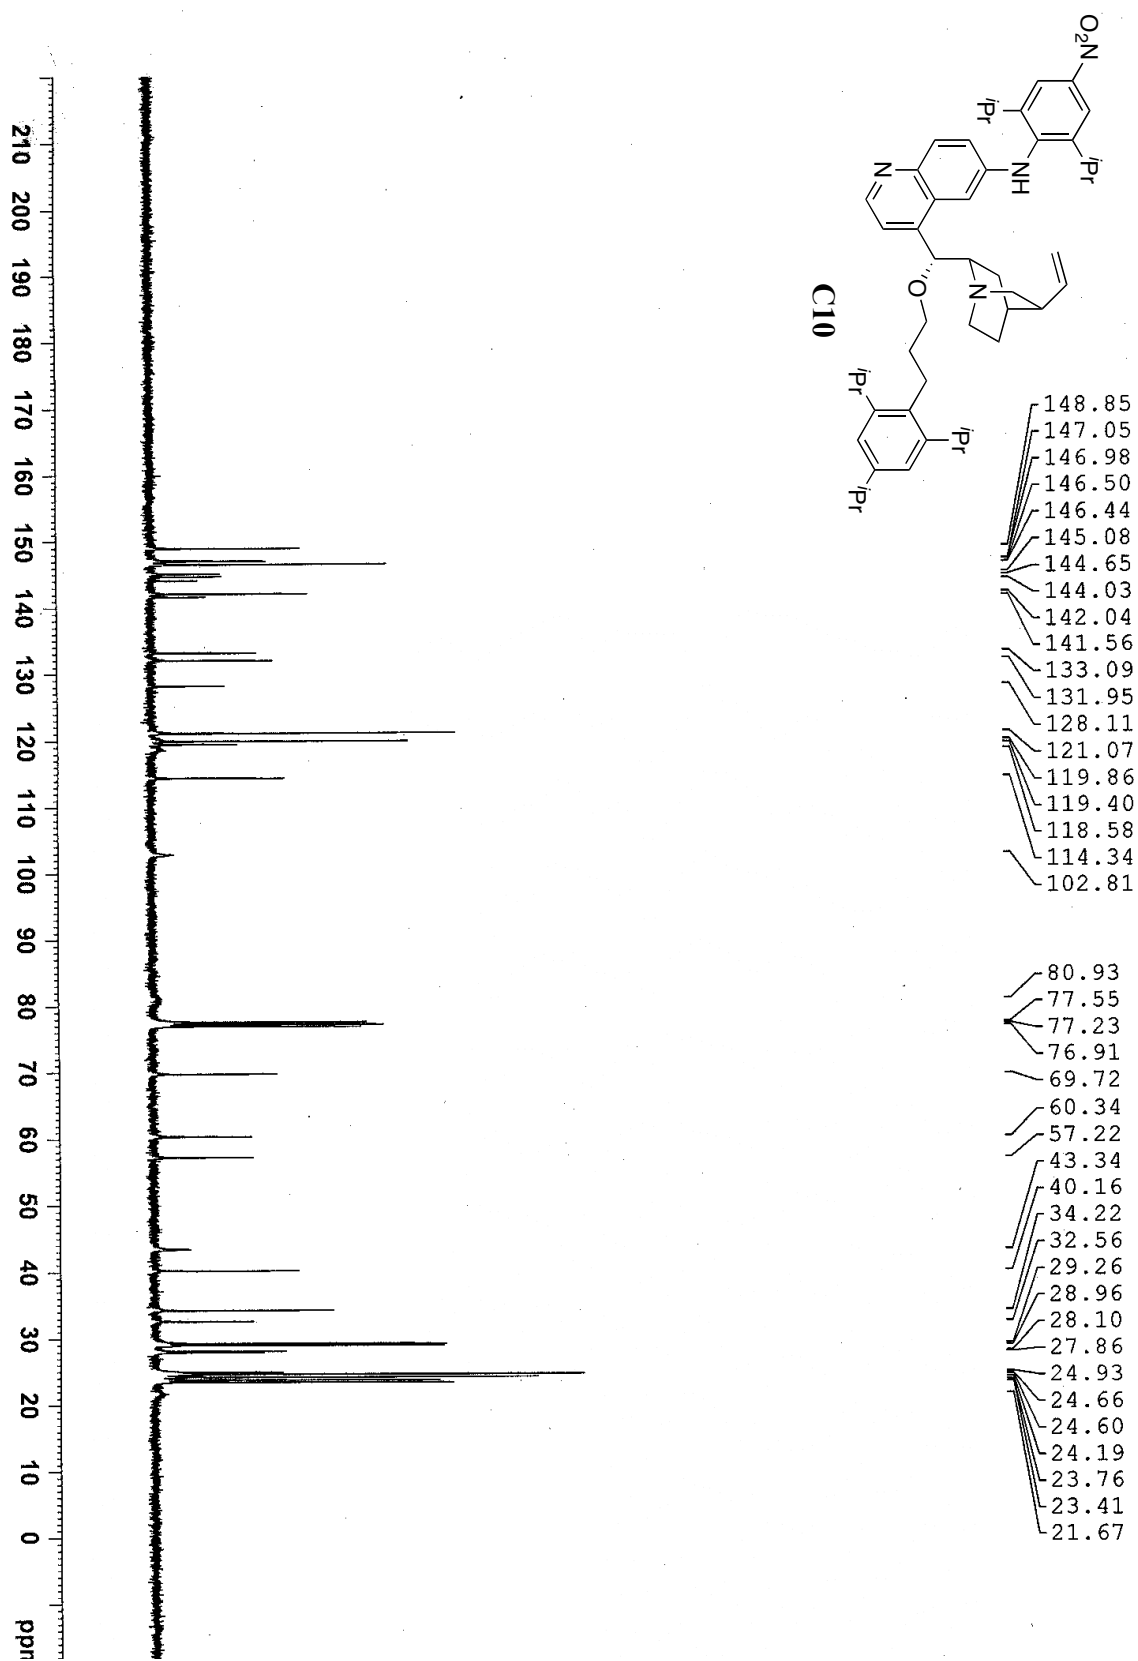



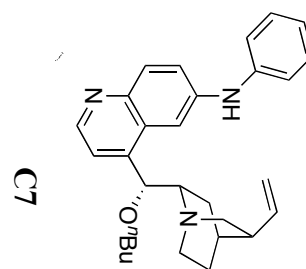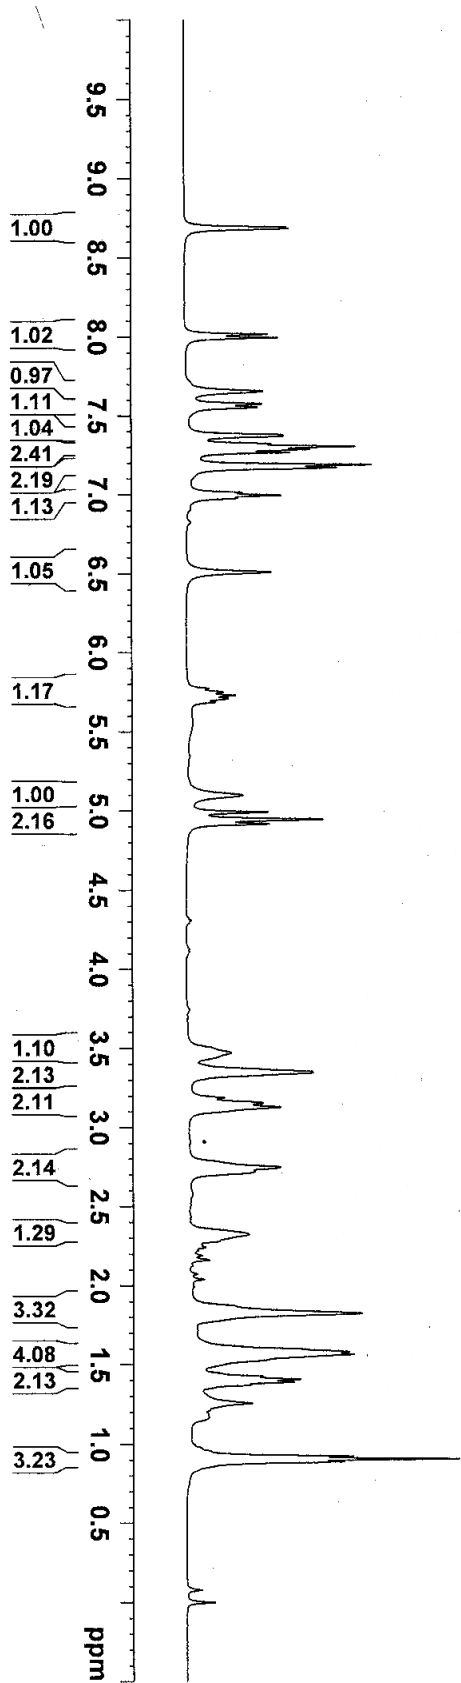

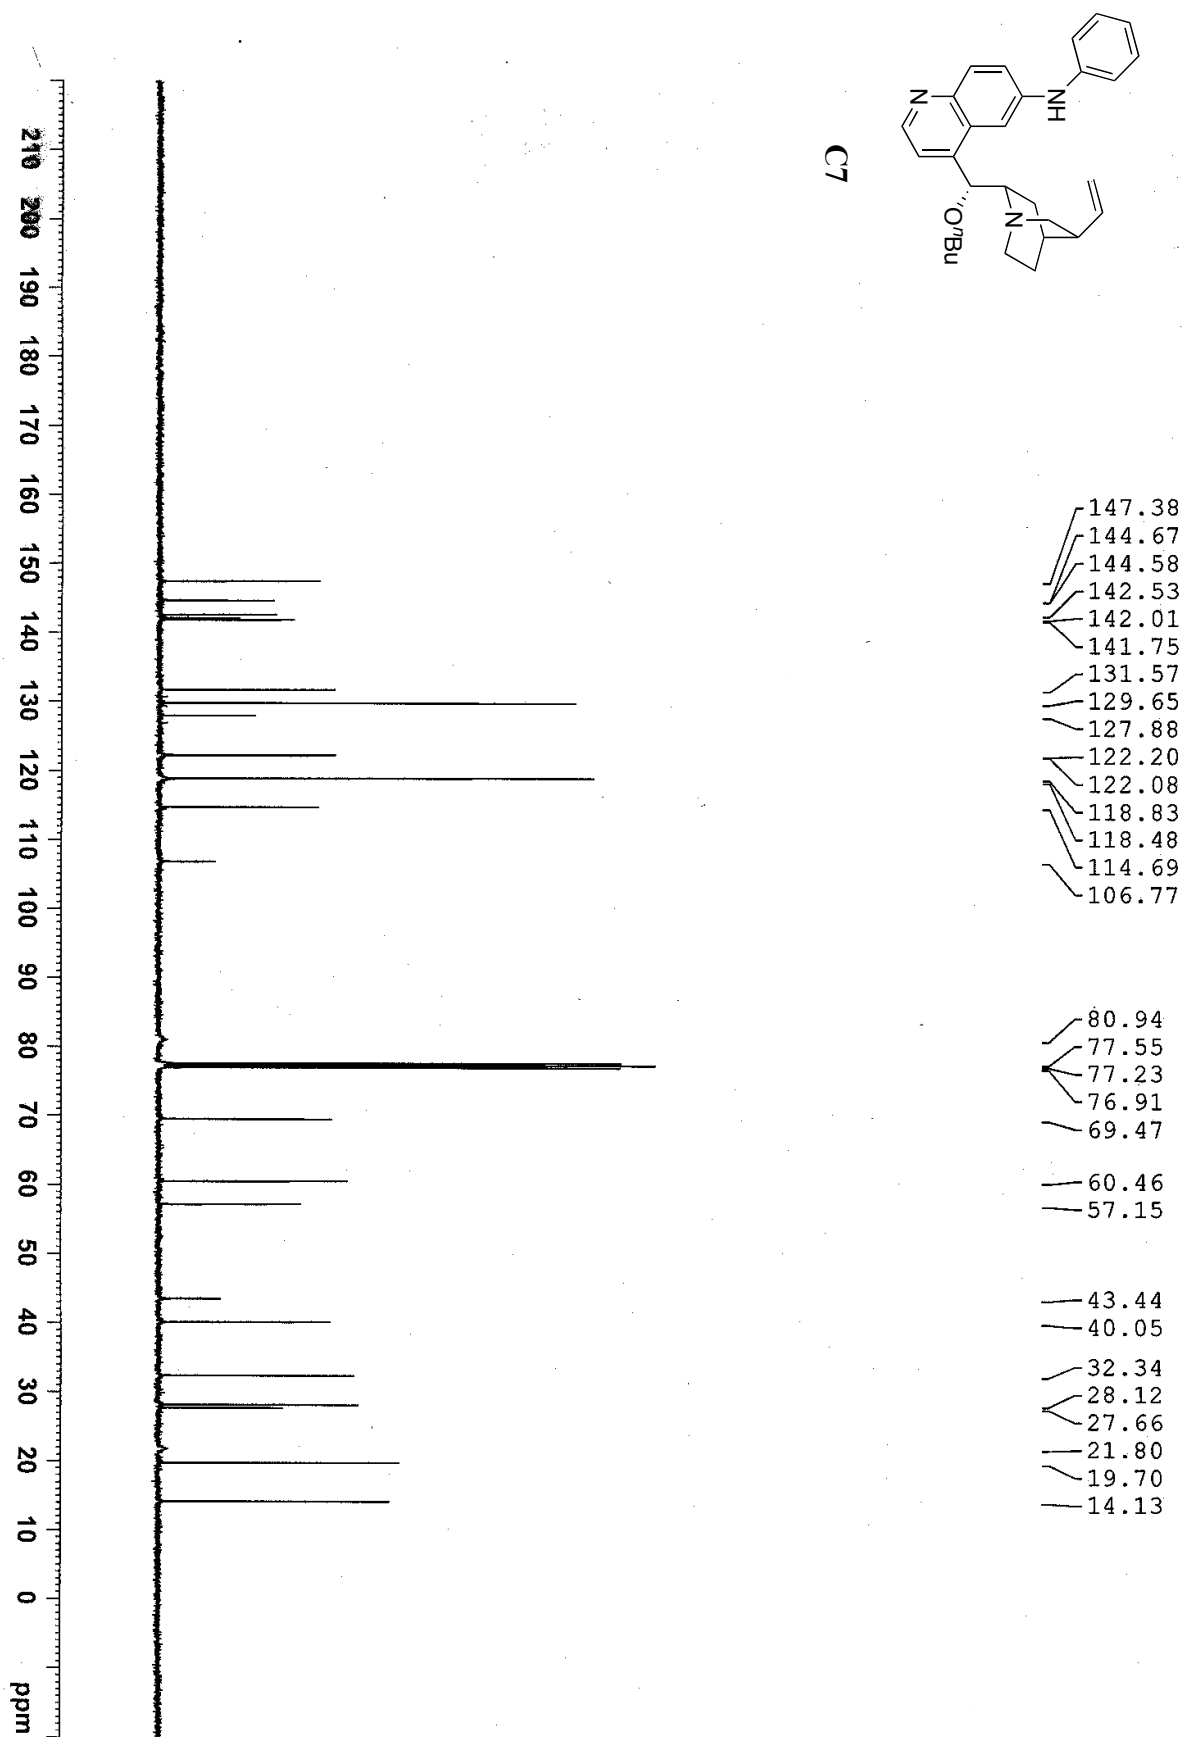

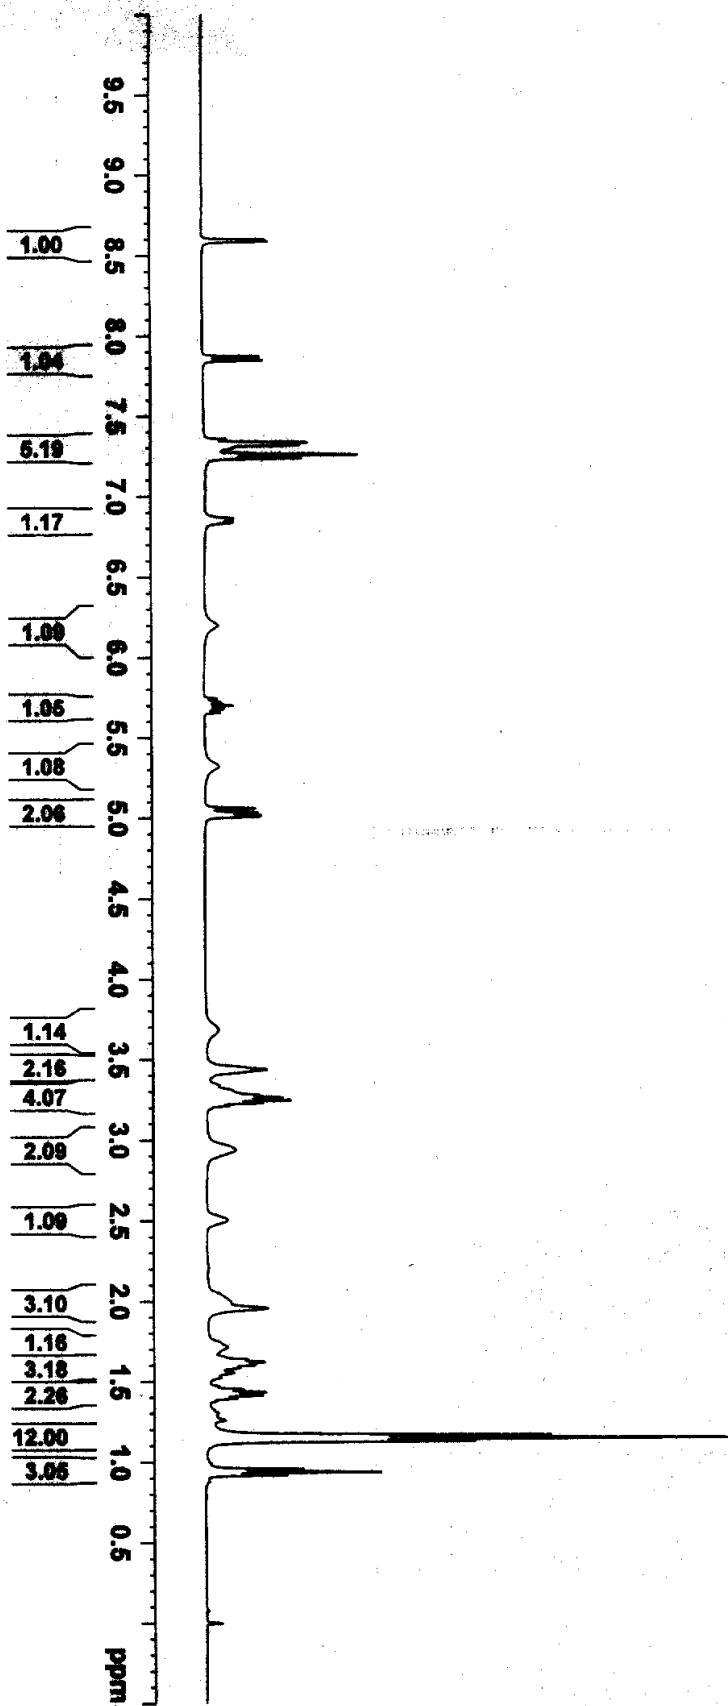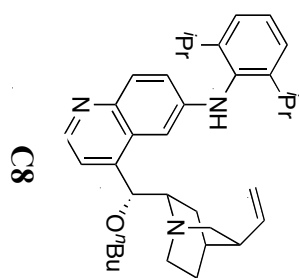

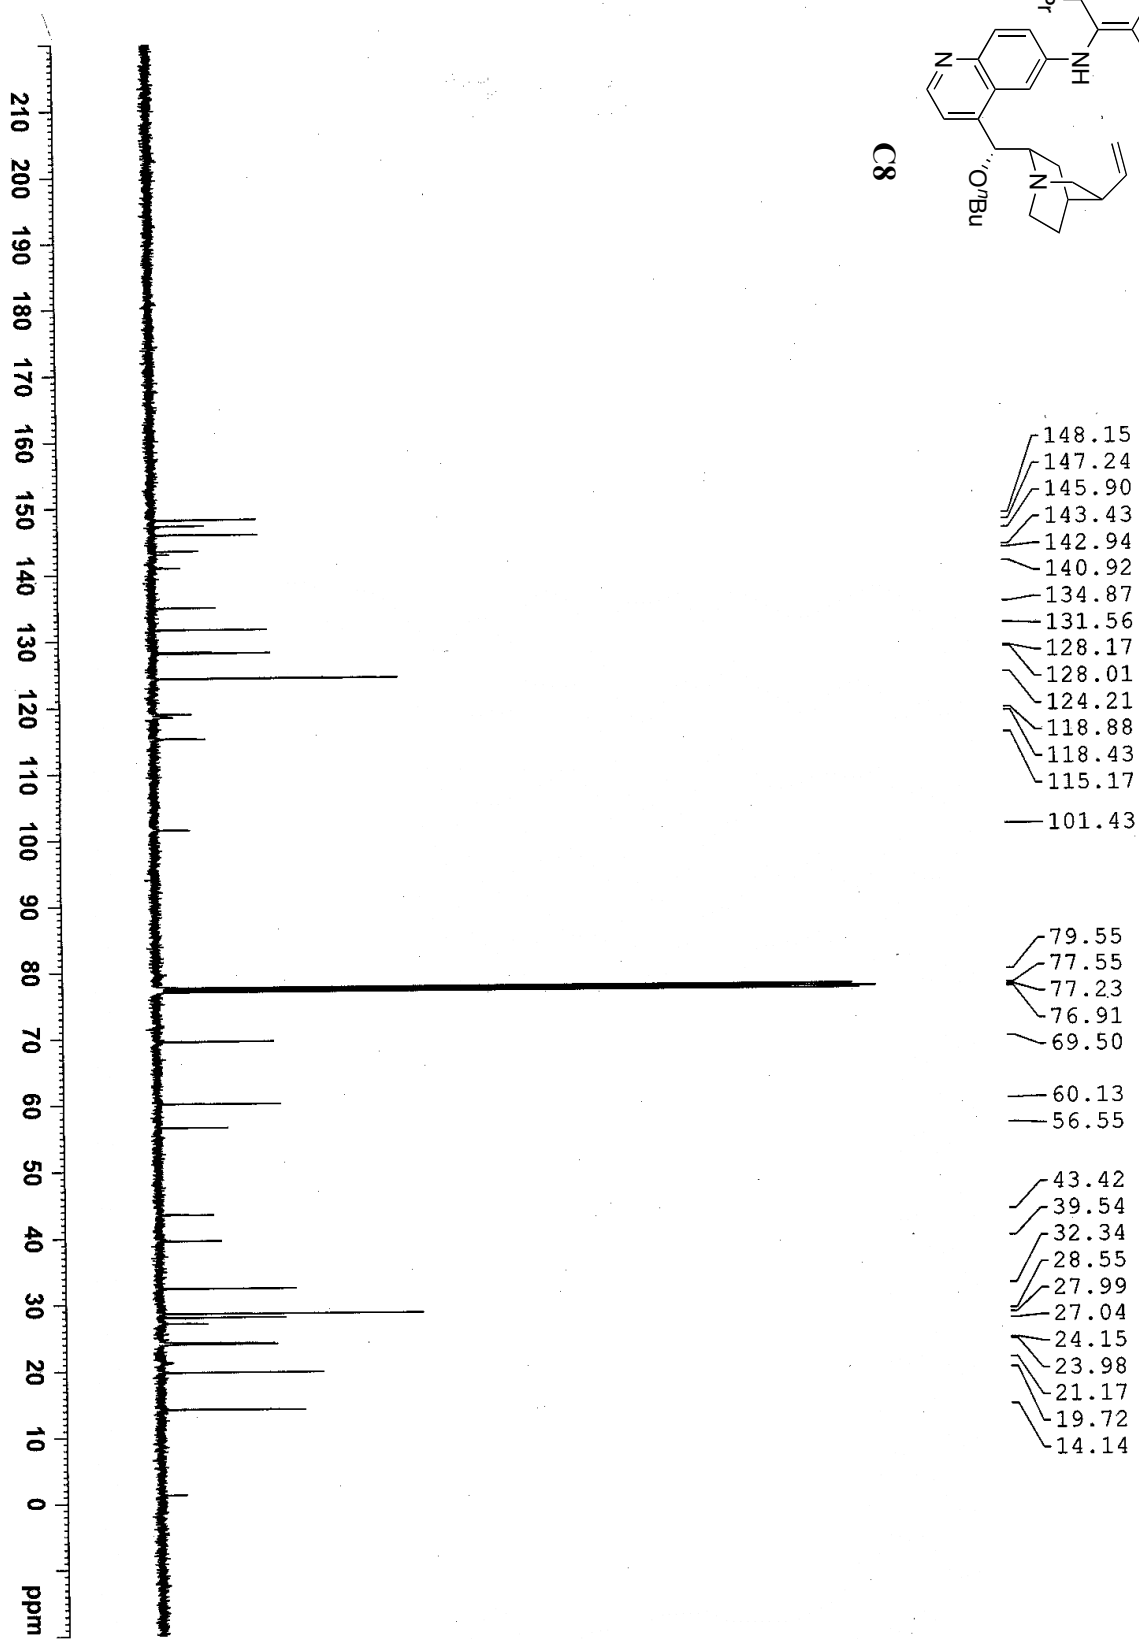

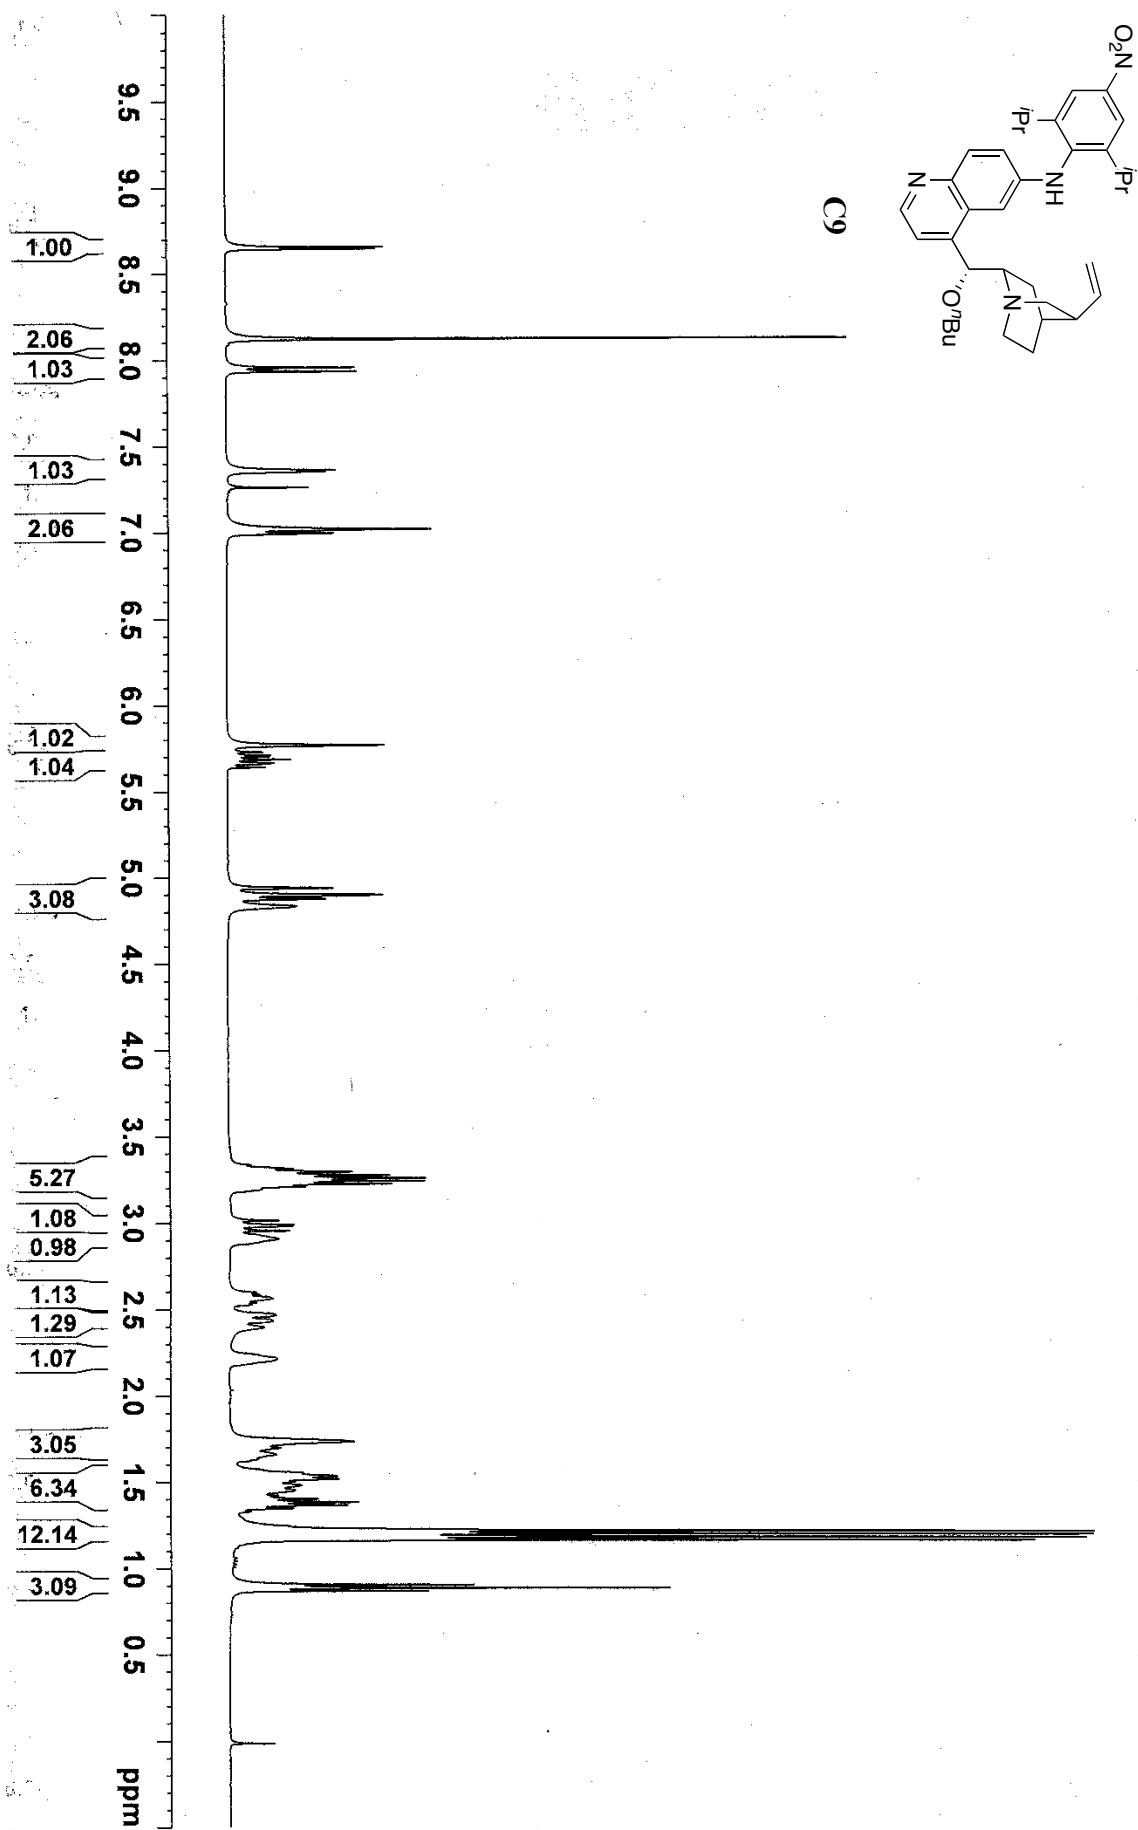

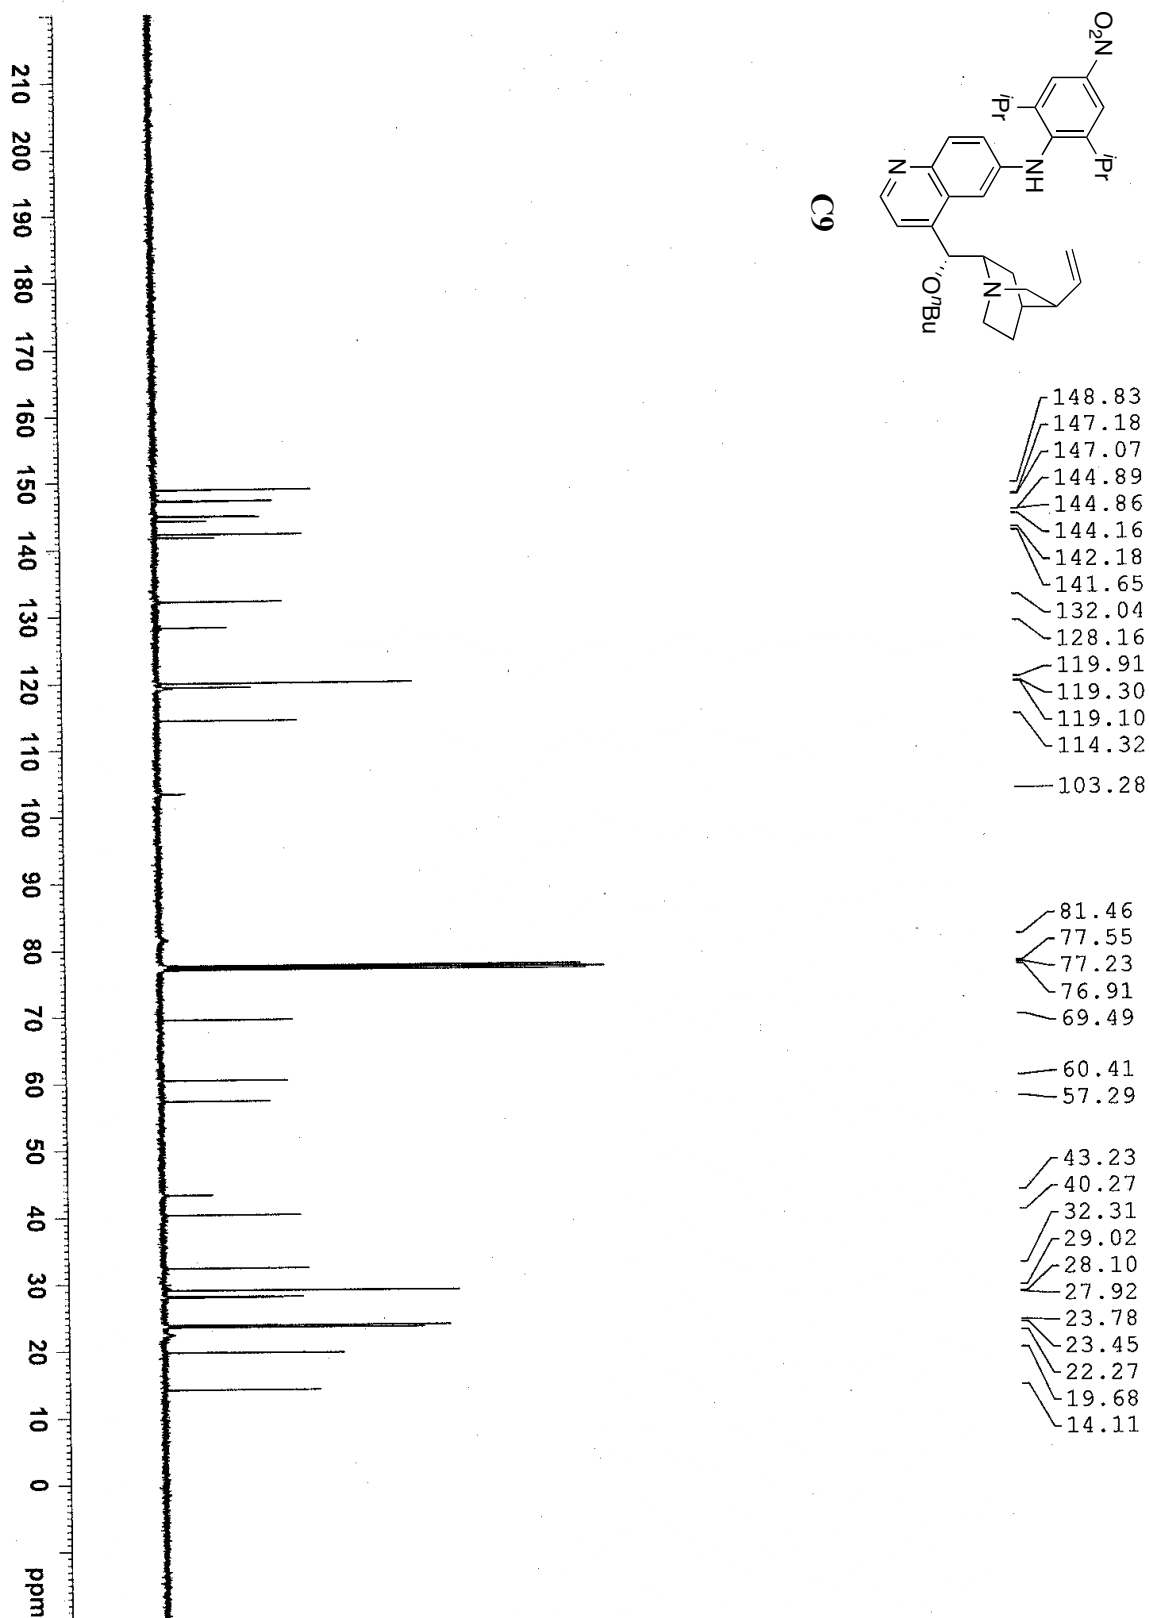

Table 2, entry 1

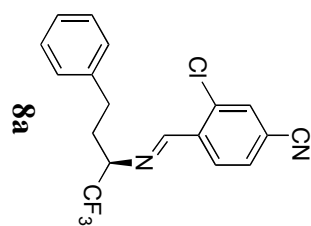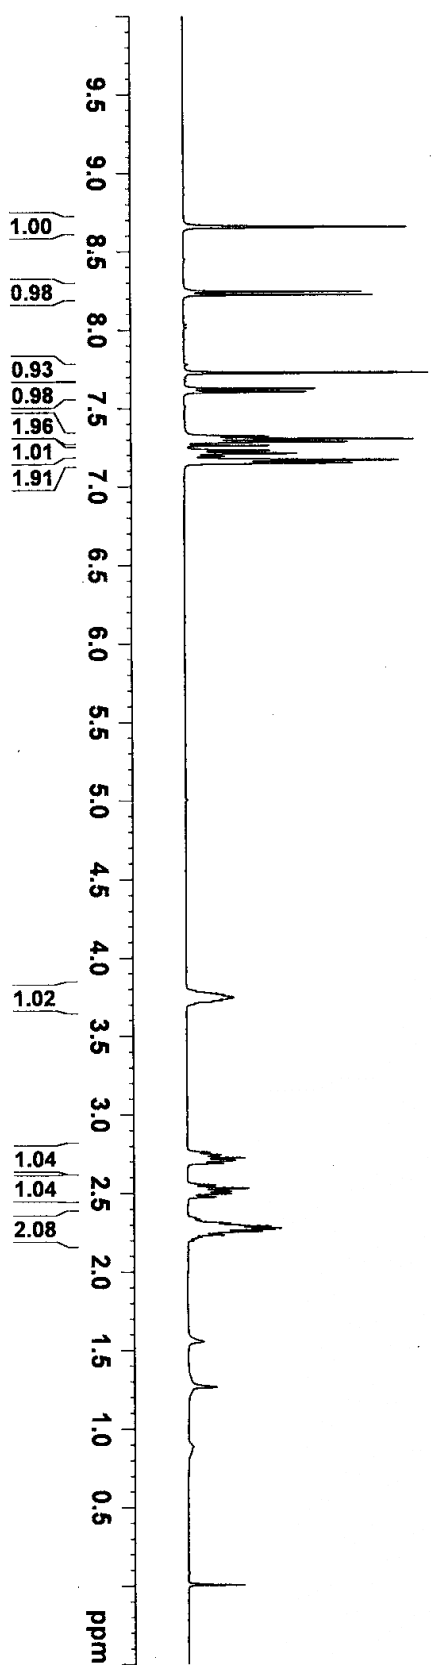

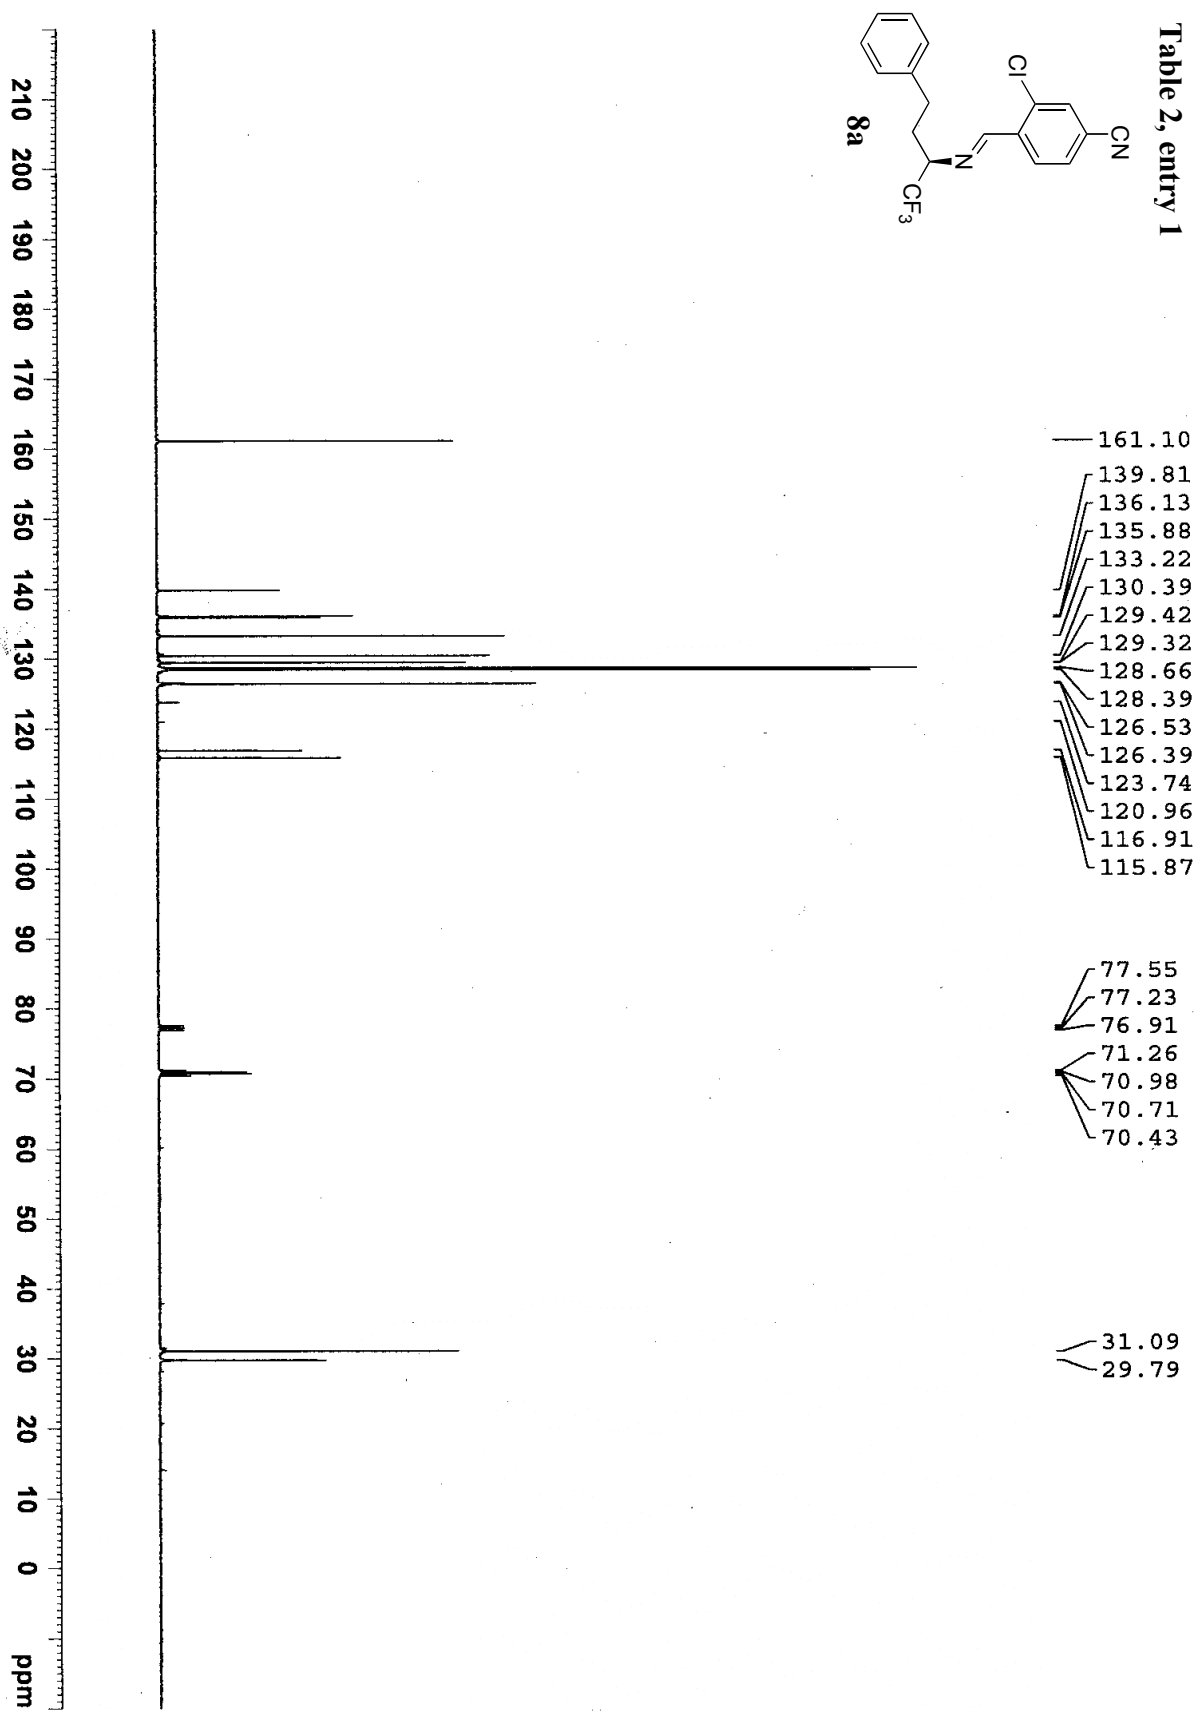



Table 2, entry 1

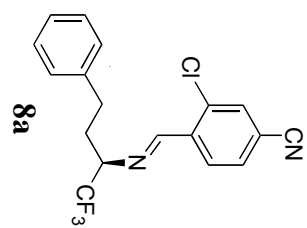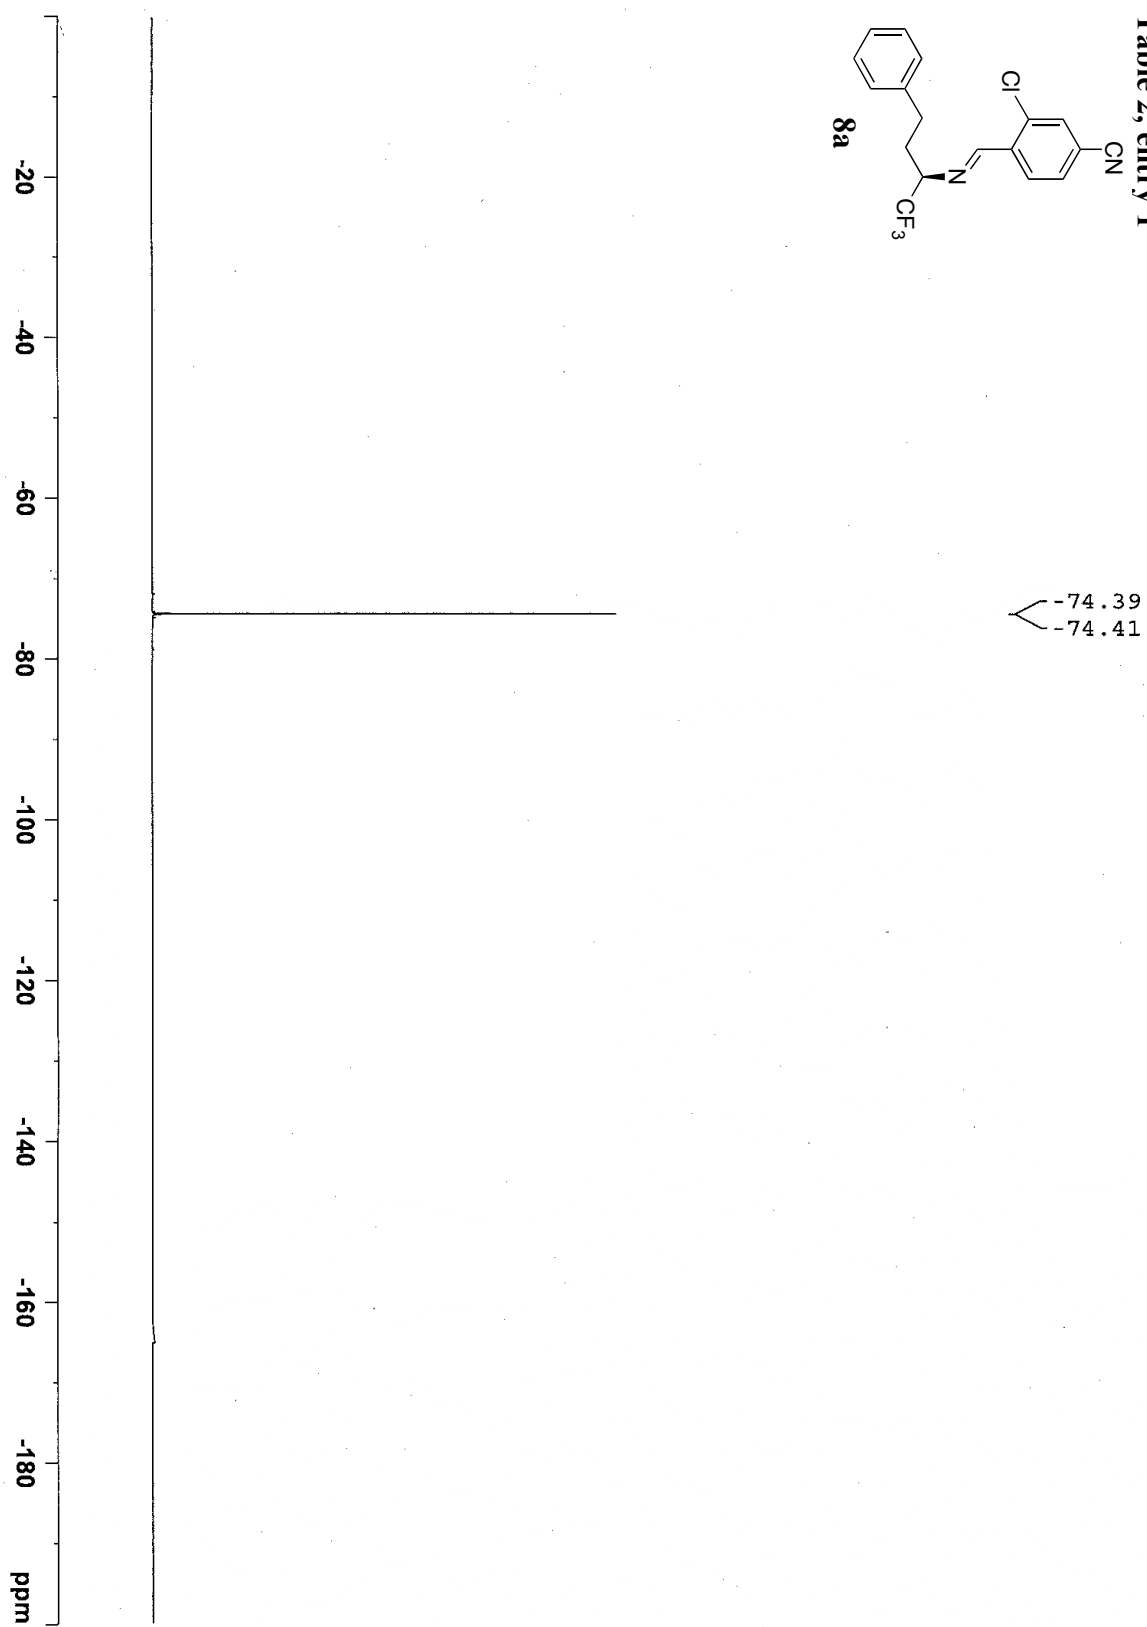

Table 2, entry 2

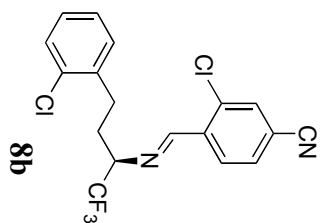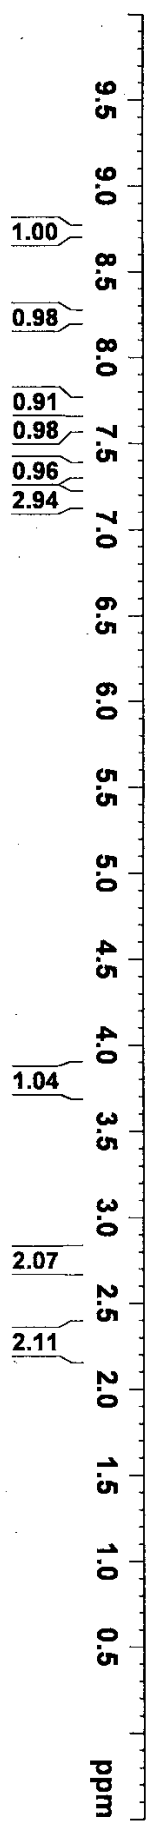

Table 2, entry 2

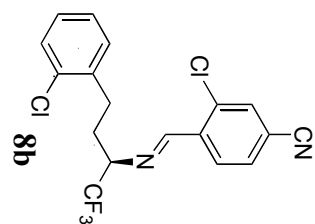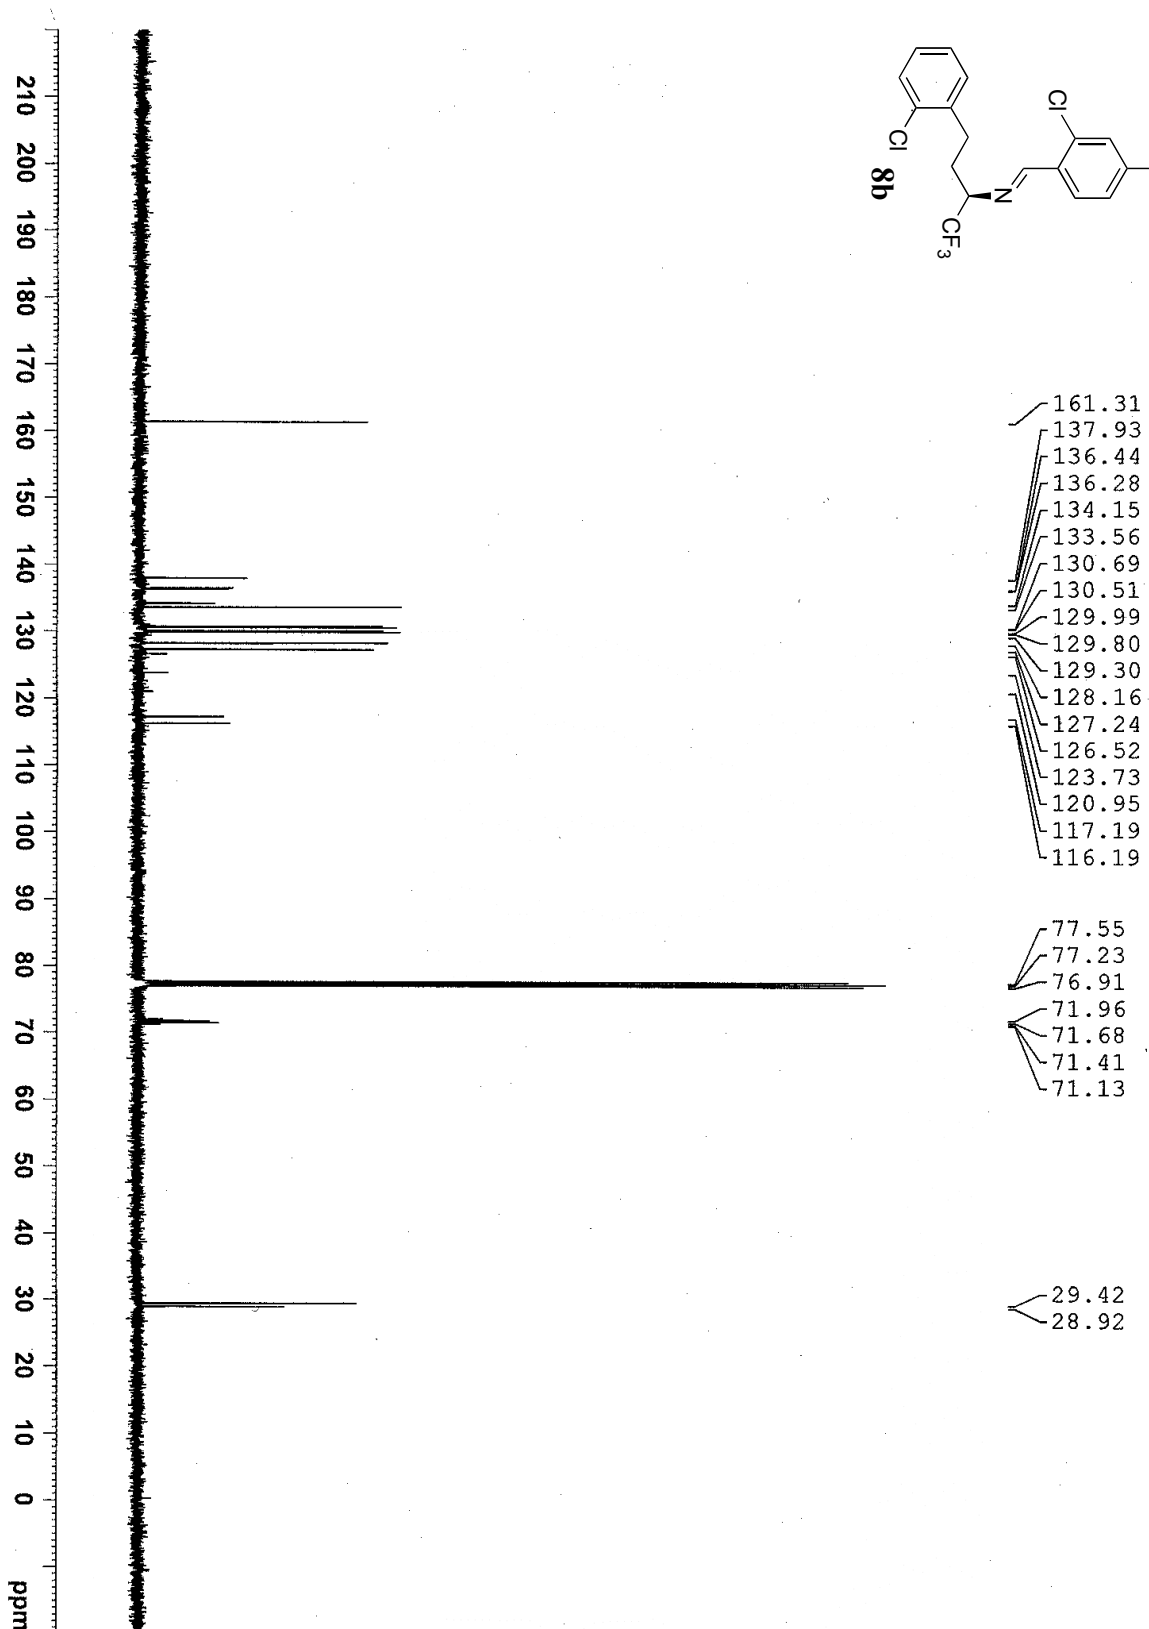

Table 2, entry 2

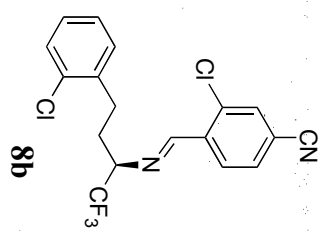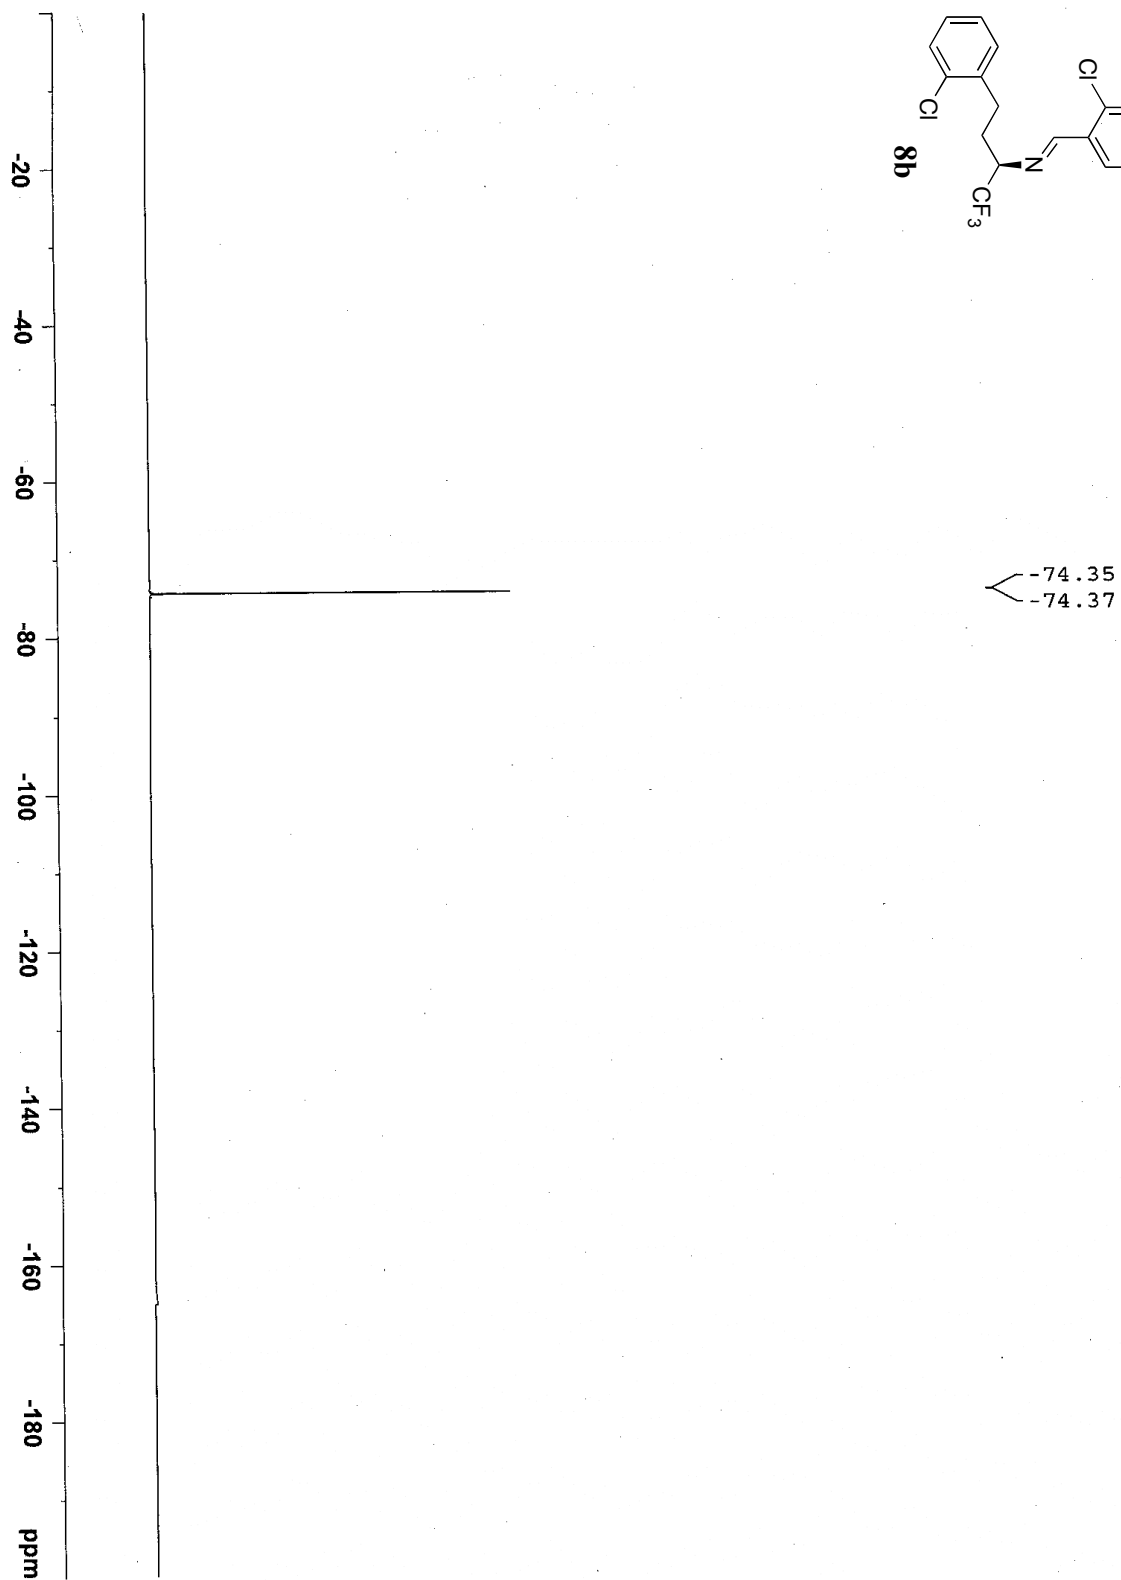

Table 2, entry 3

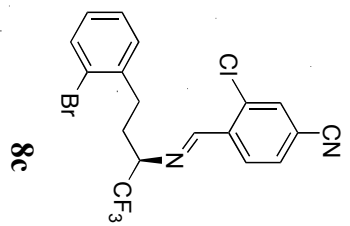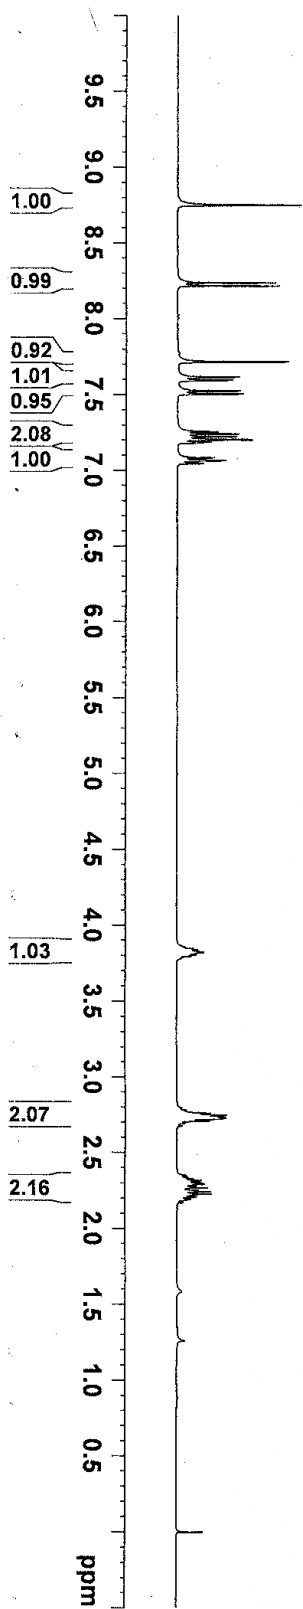

Table 2, entry 3

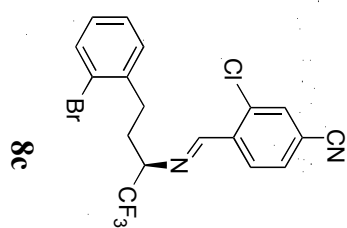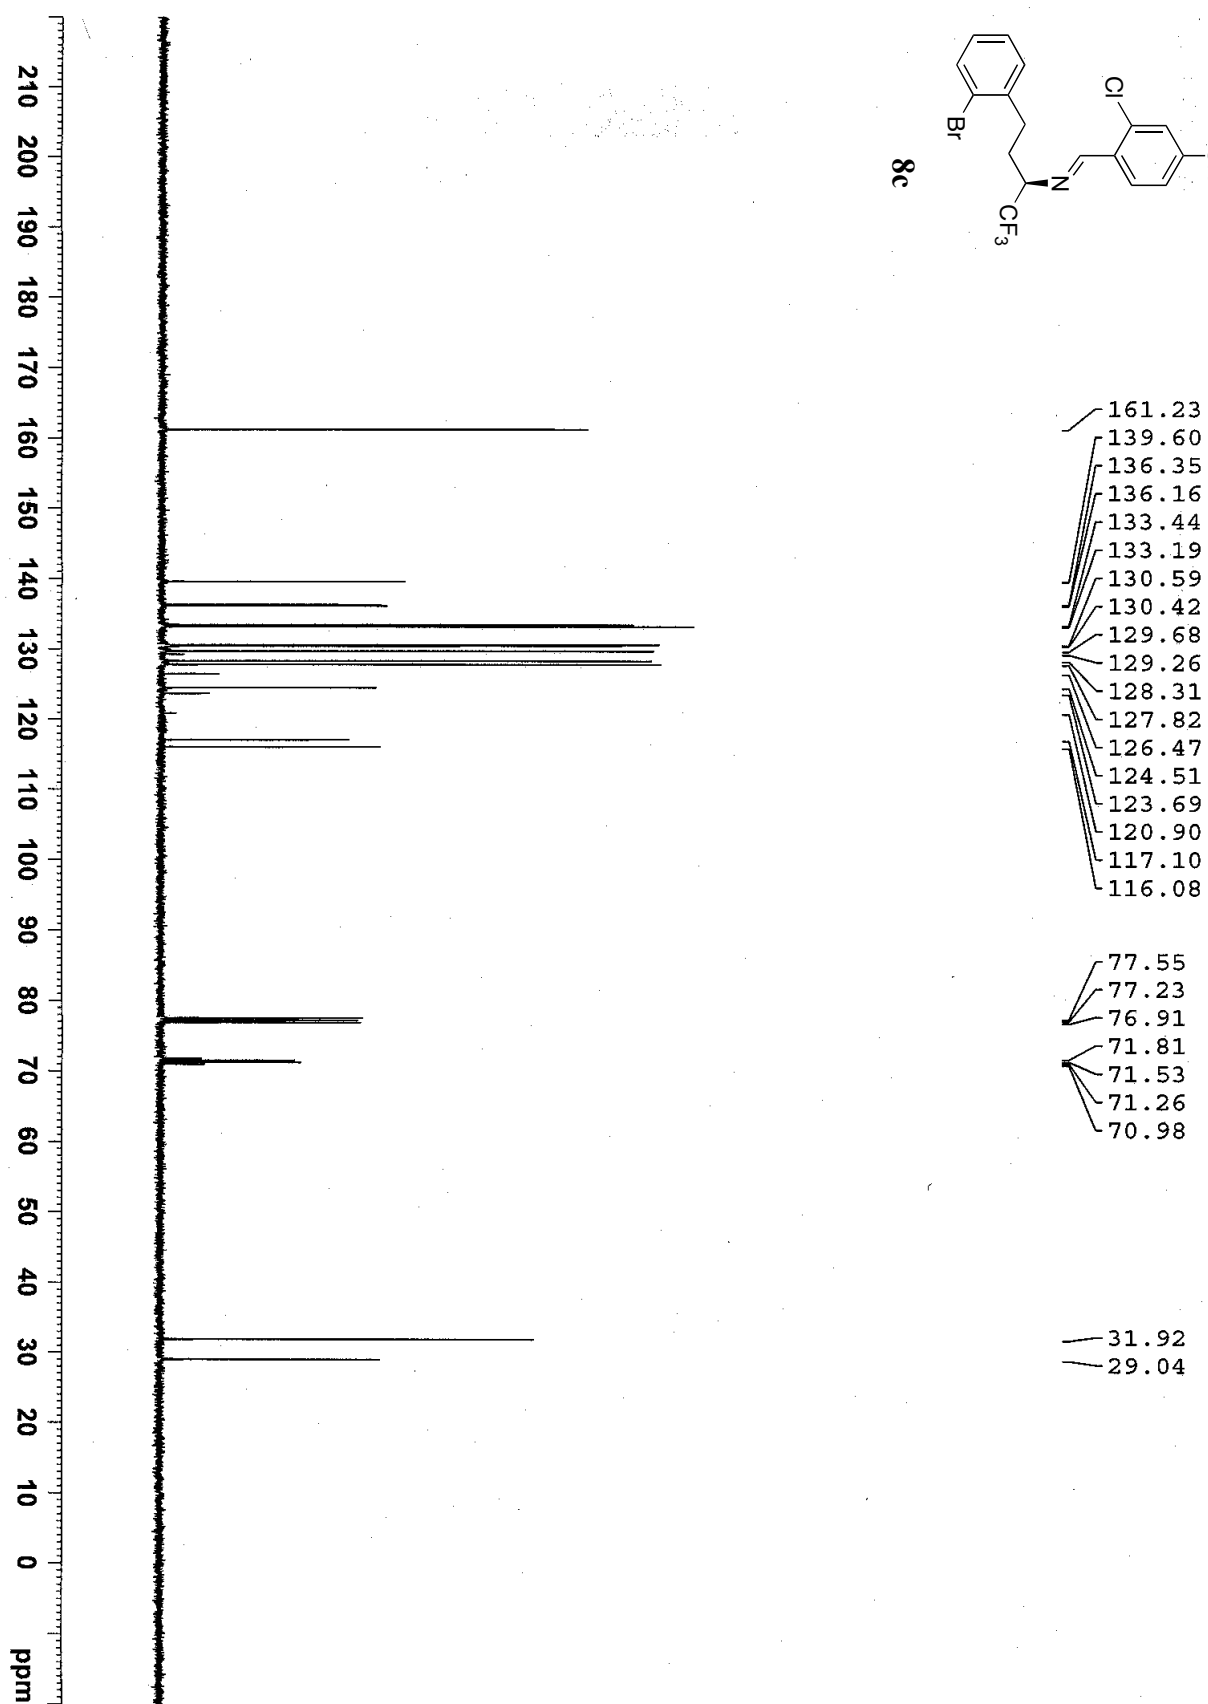

Table 2, entry 3

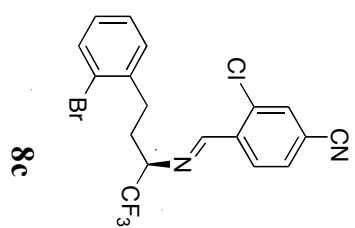

-74.31  
-74.33

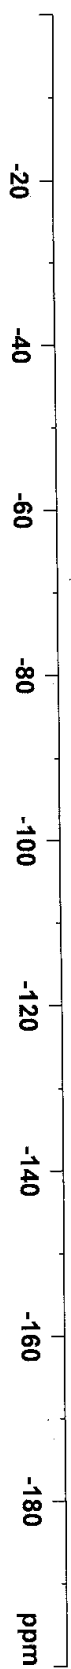

Table 2, entry 4

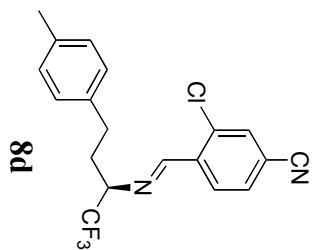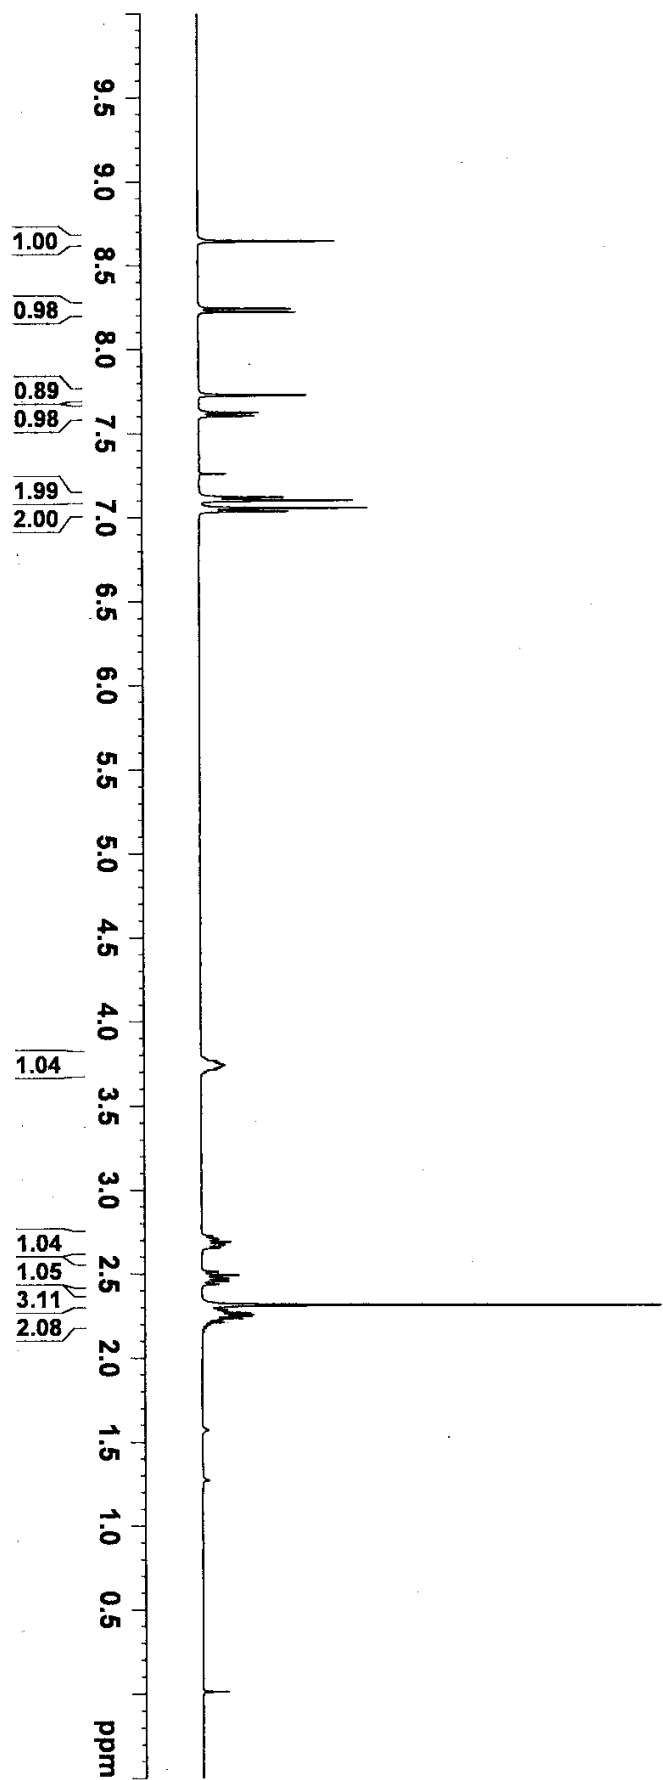



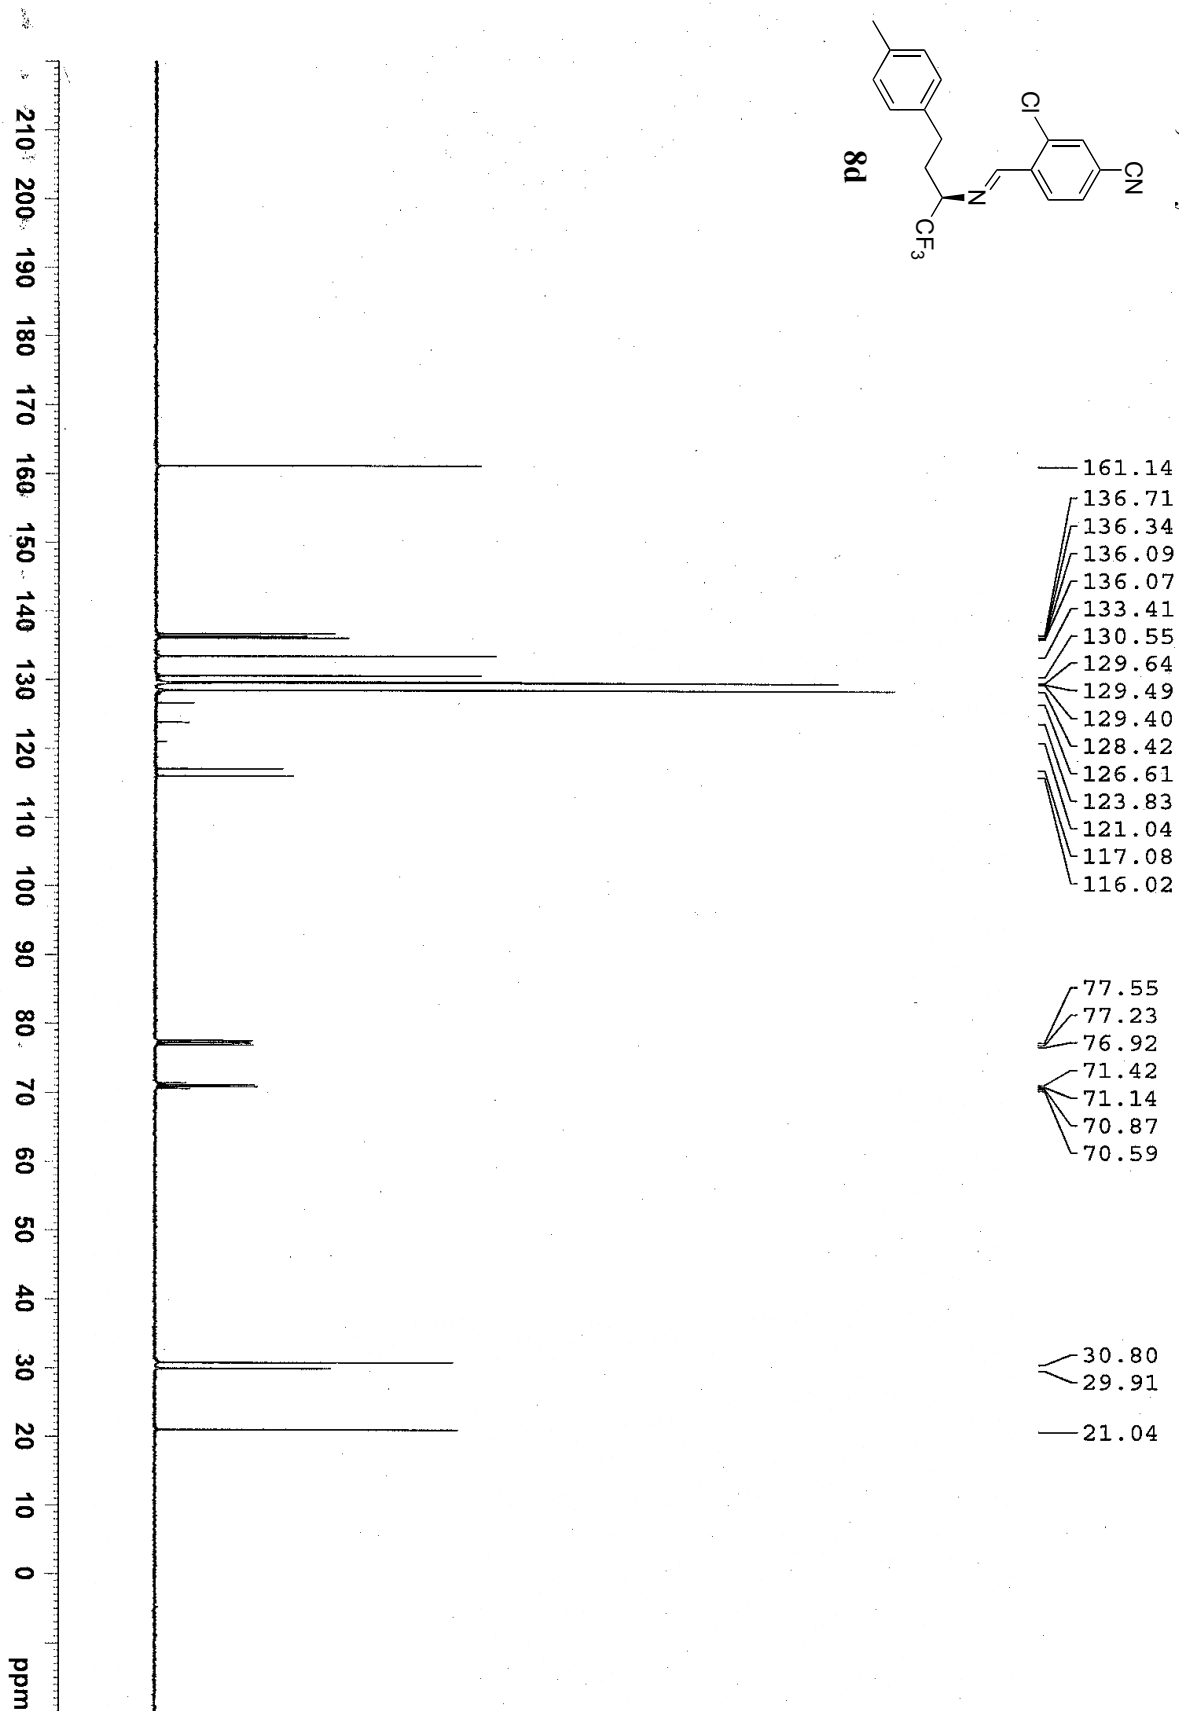

Table 2, entry 4

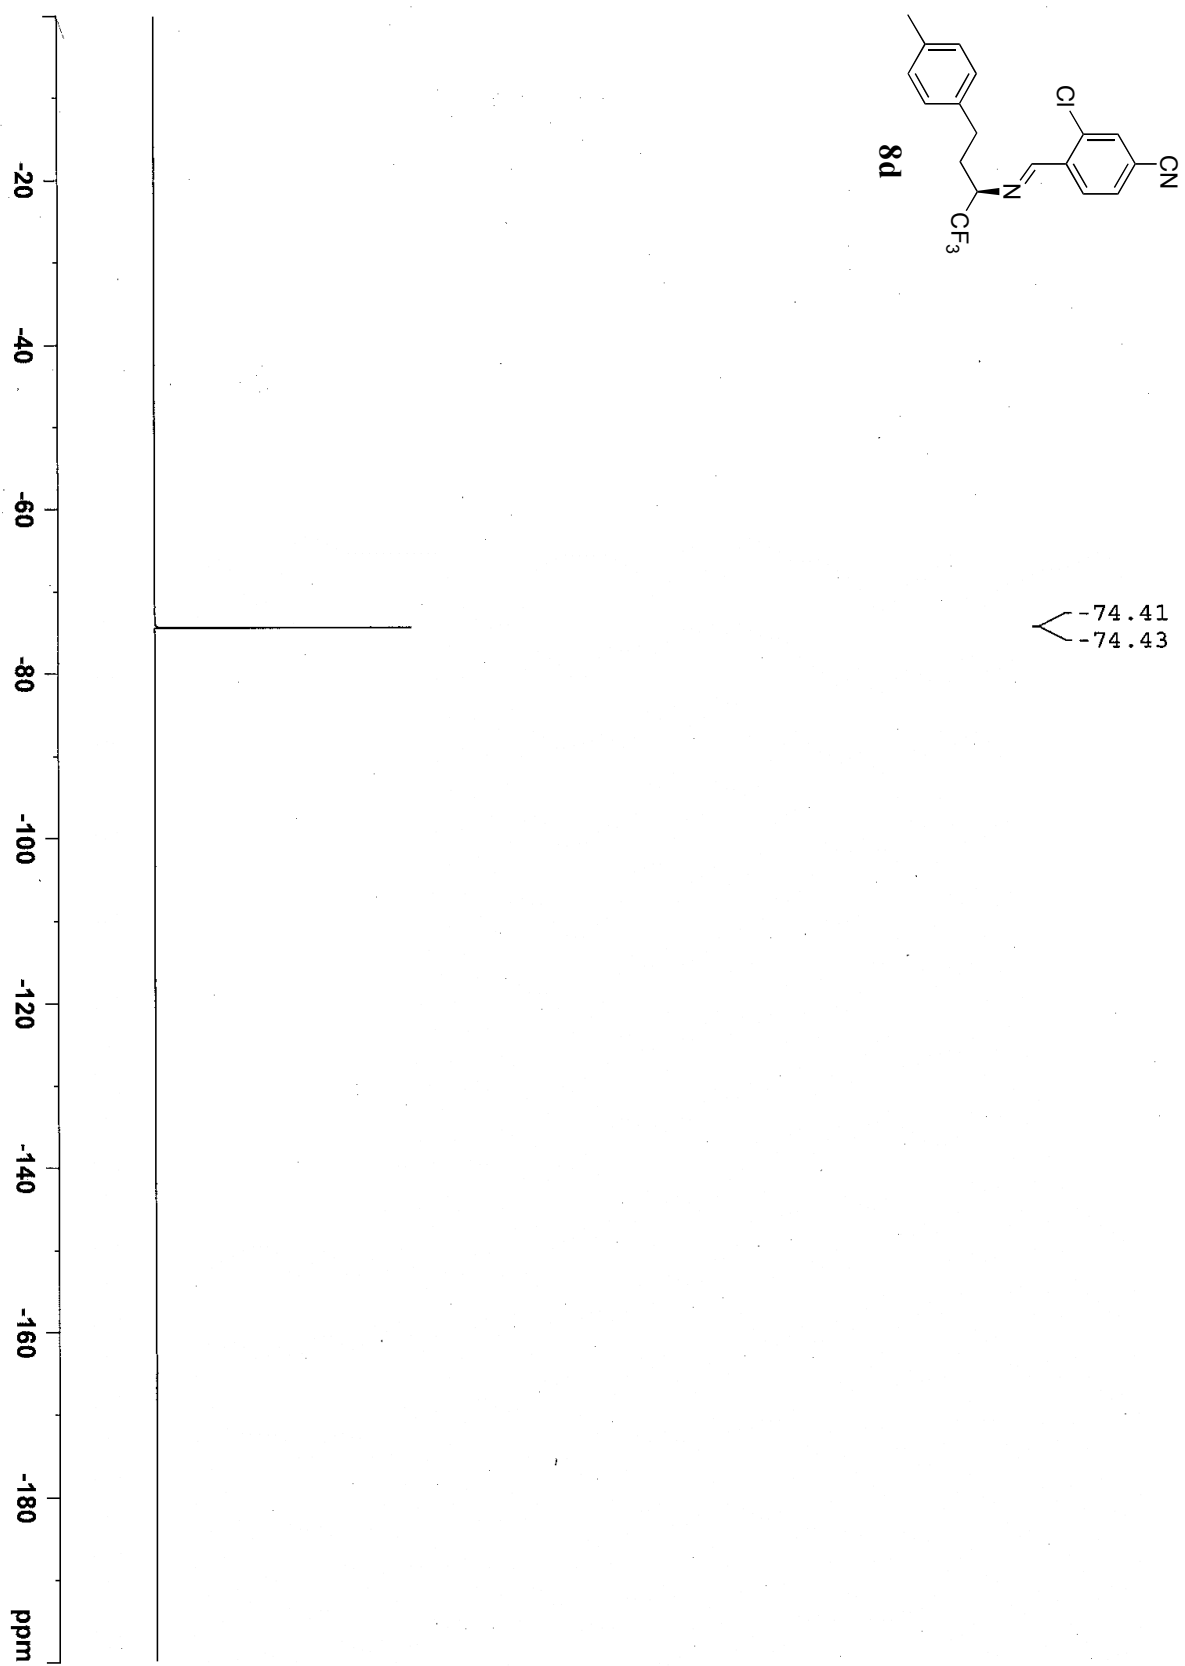

Table 2, entry 5

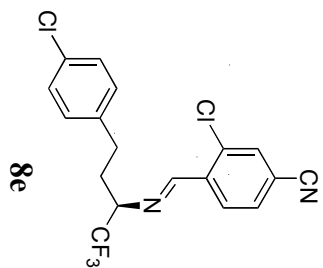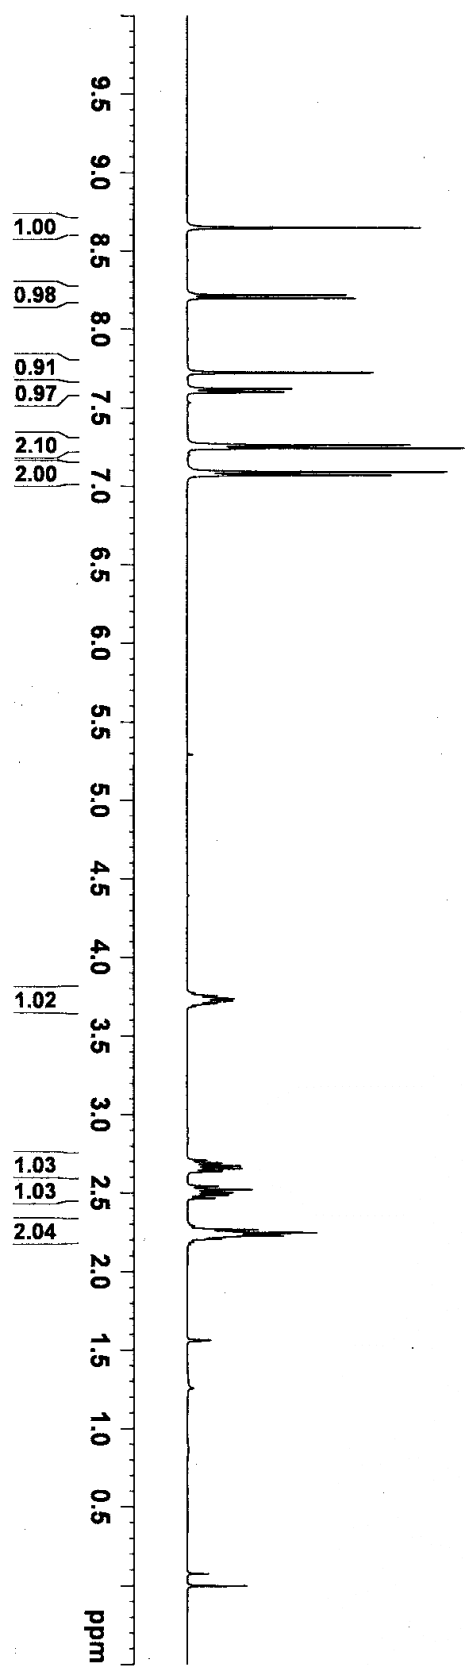

Table 2, entry 5

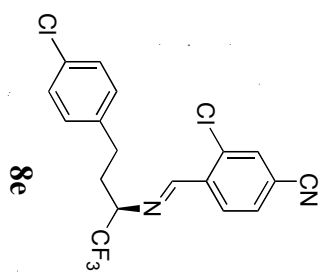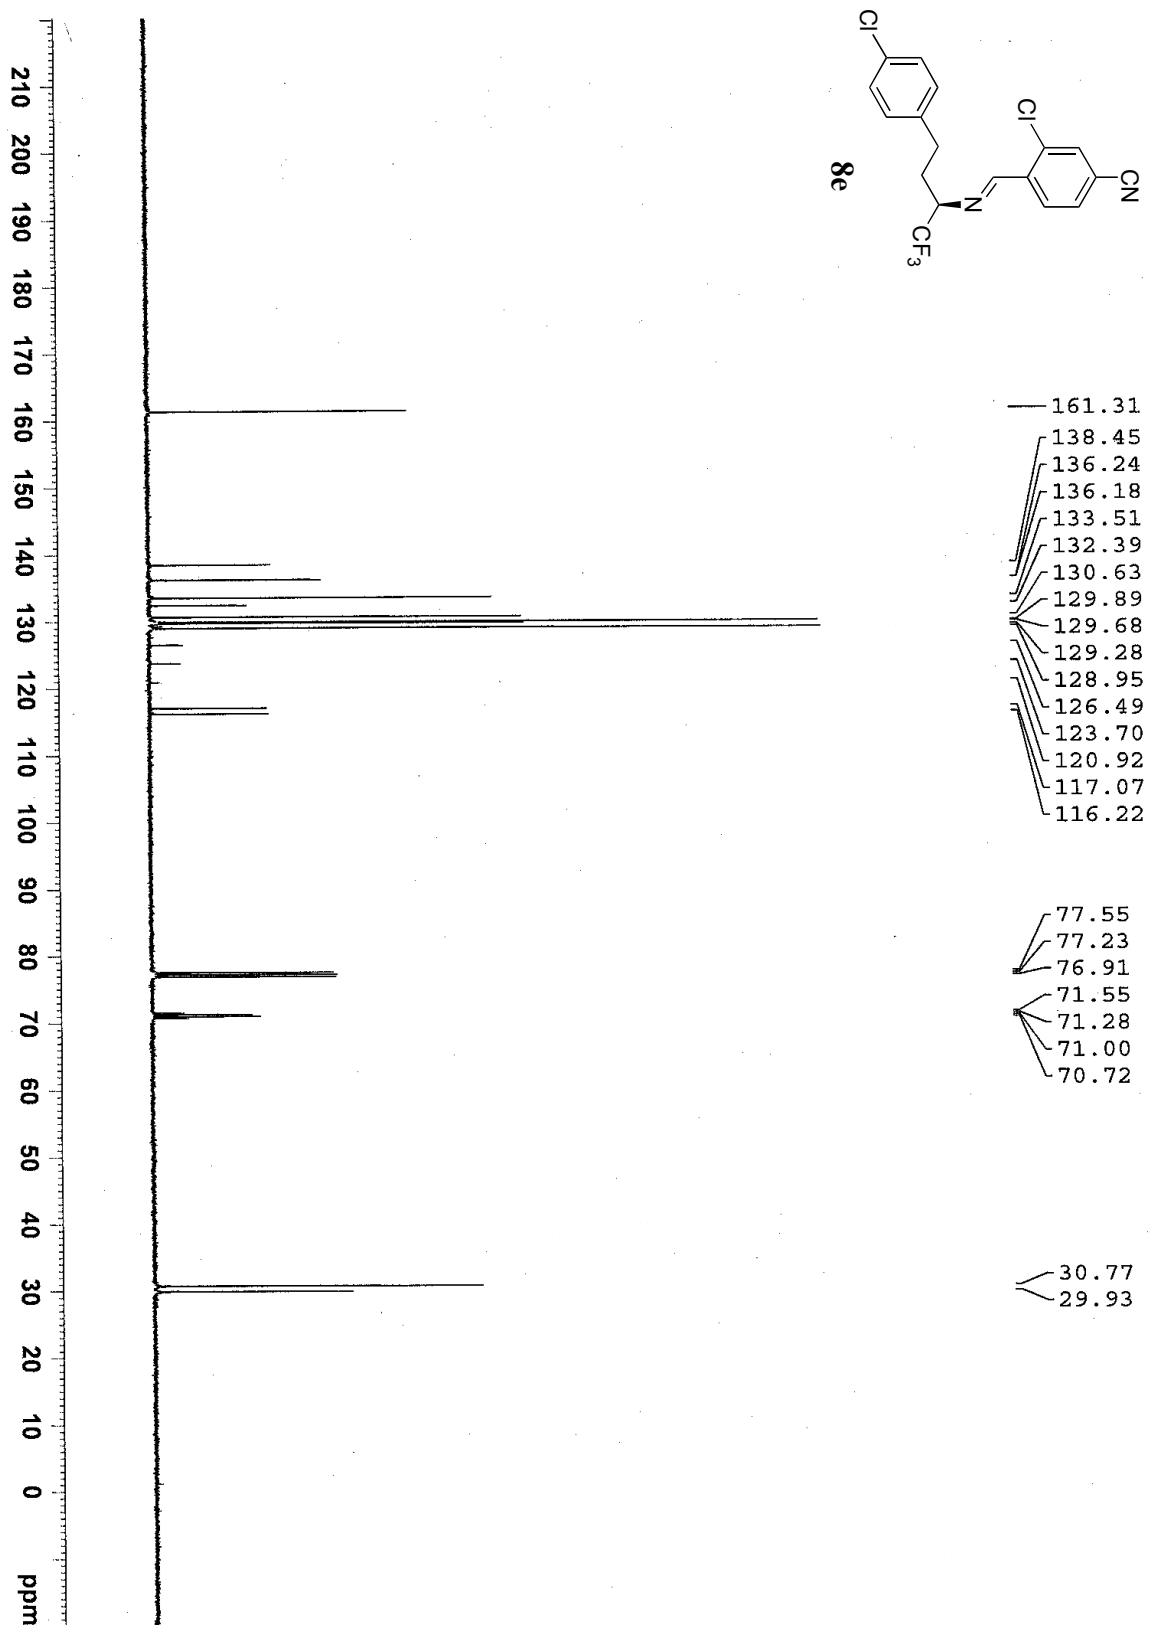

Table 2, entry 5

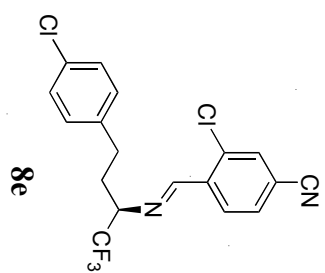

-74.38  
-74.39

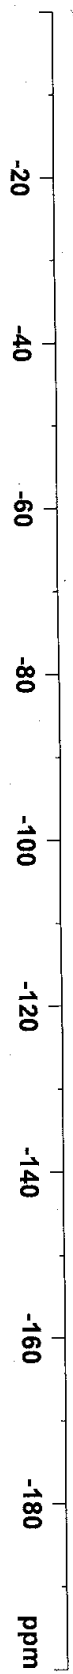

Table 2, entry 6

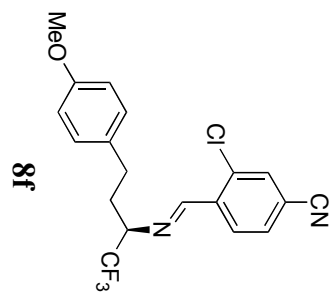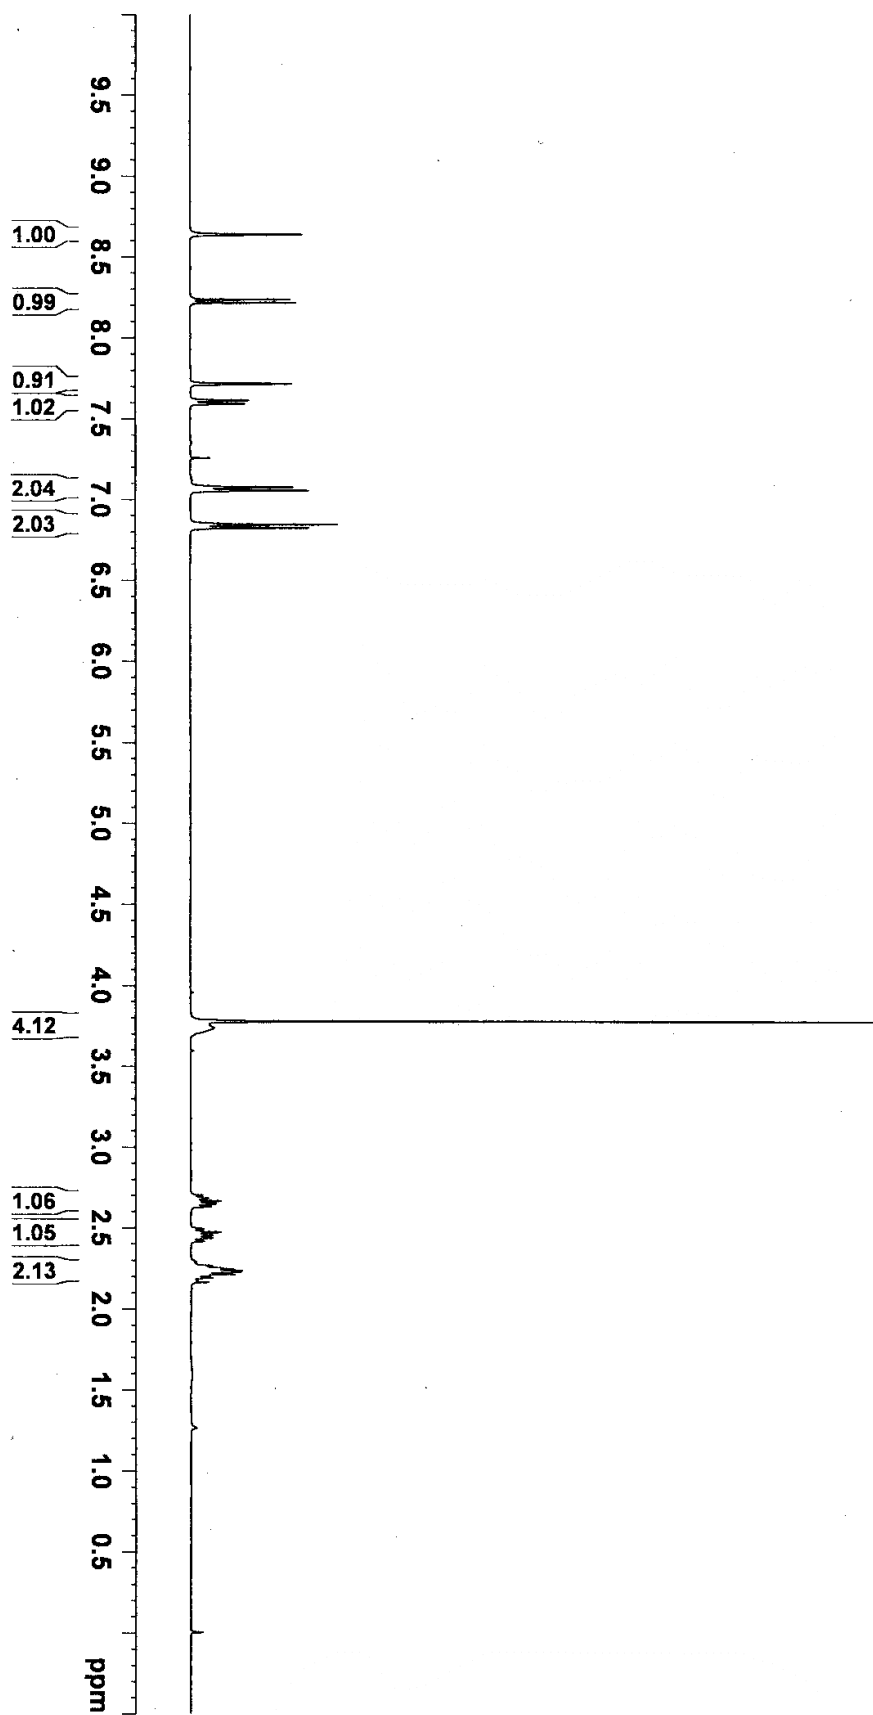

Table 2, entry 6

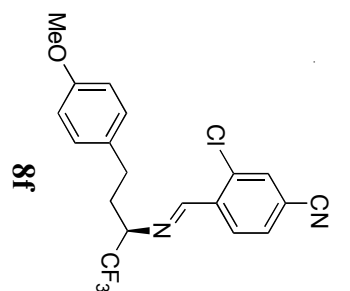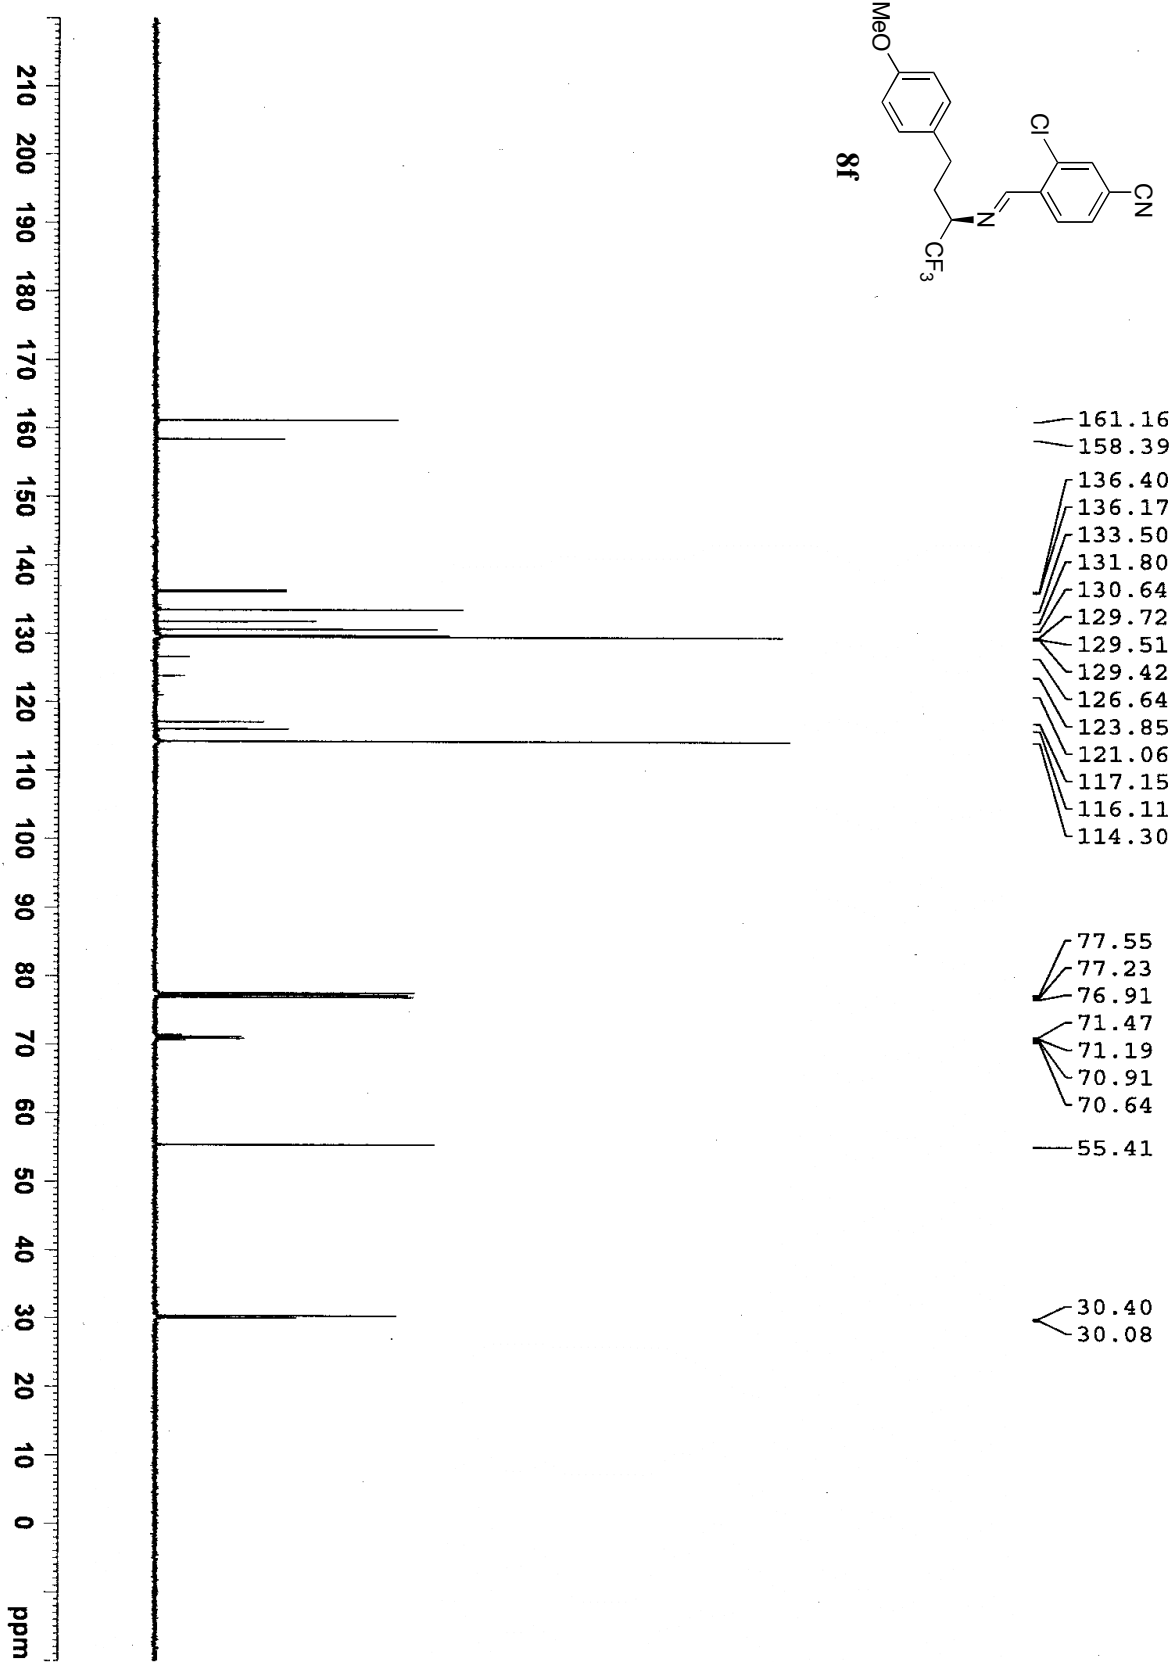

Table 2, entry 6

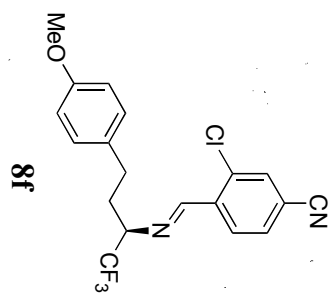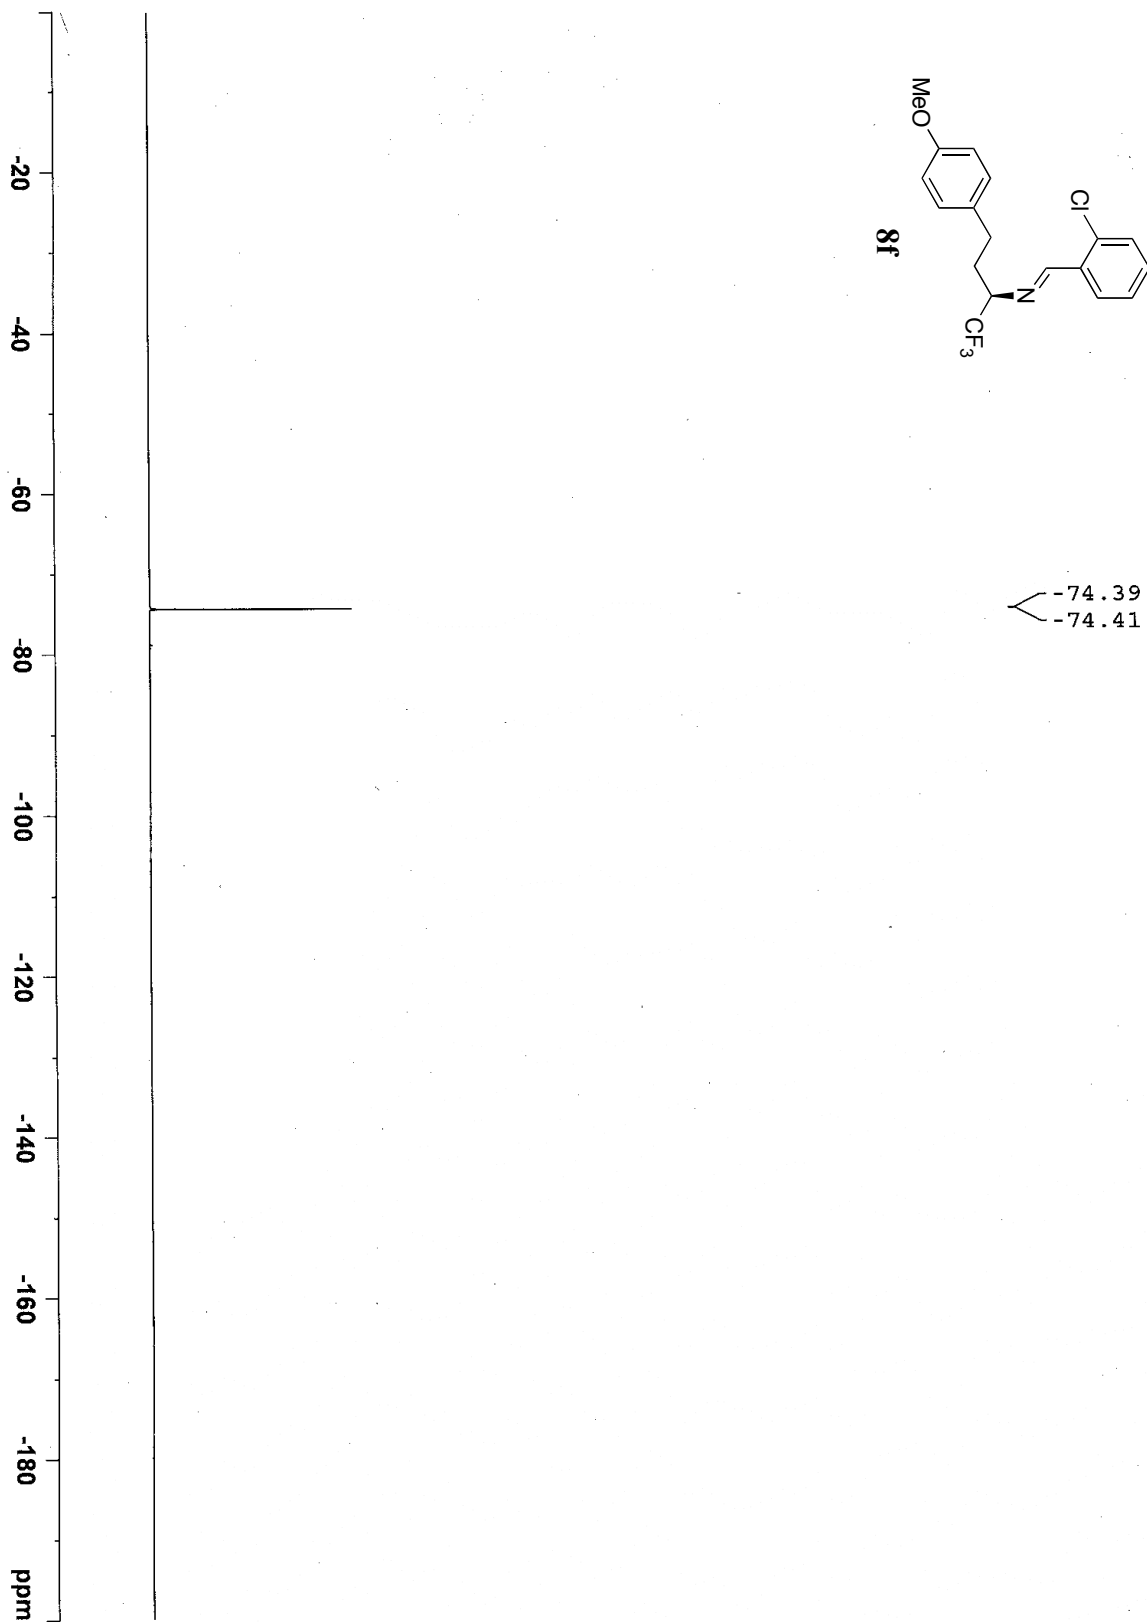



Table 2, entry 7

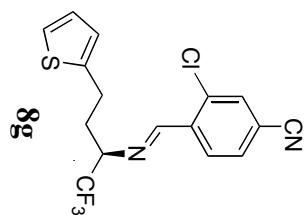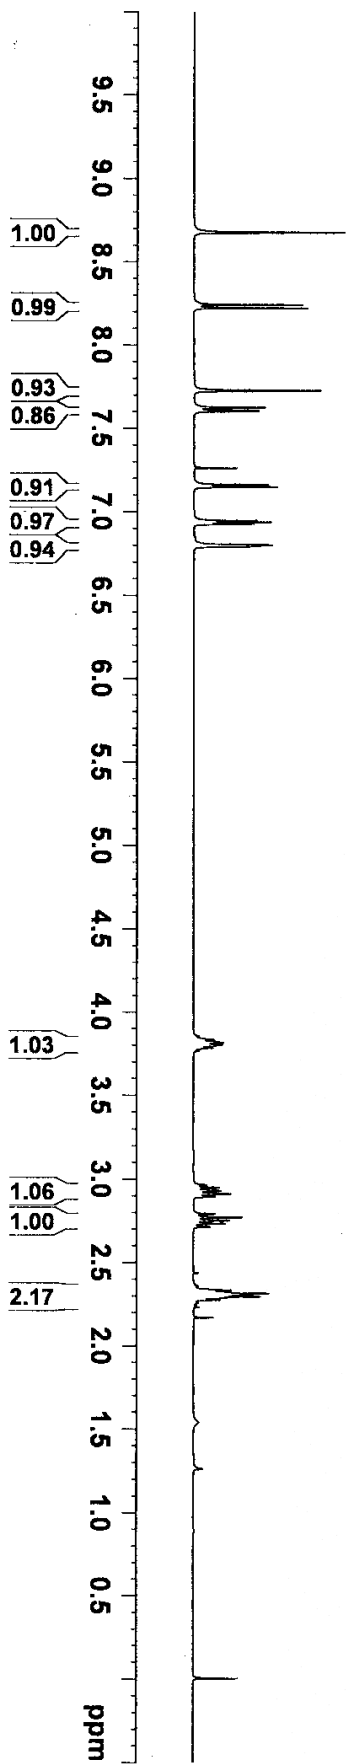

Table 2, entry 7

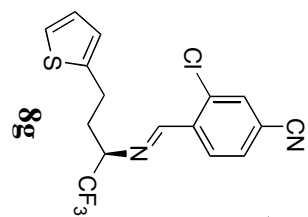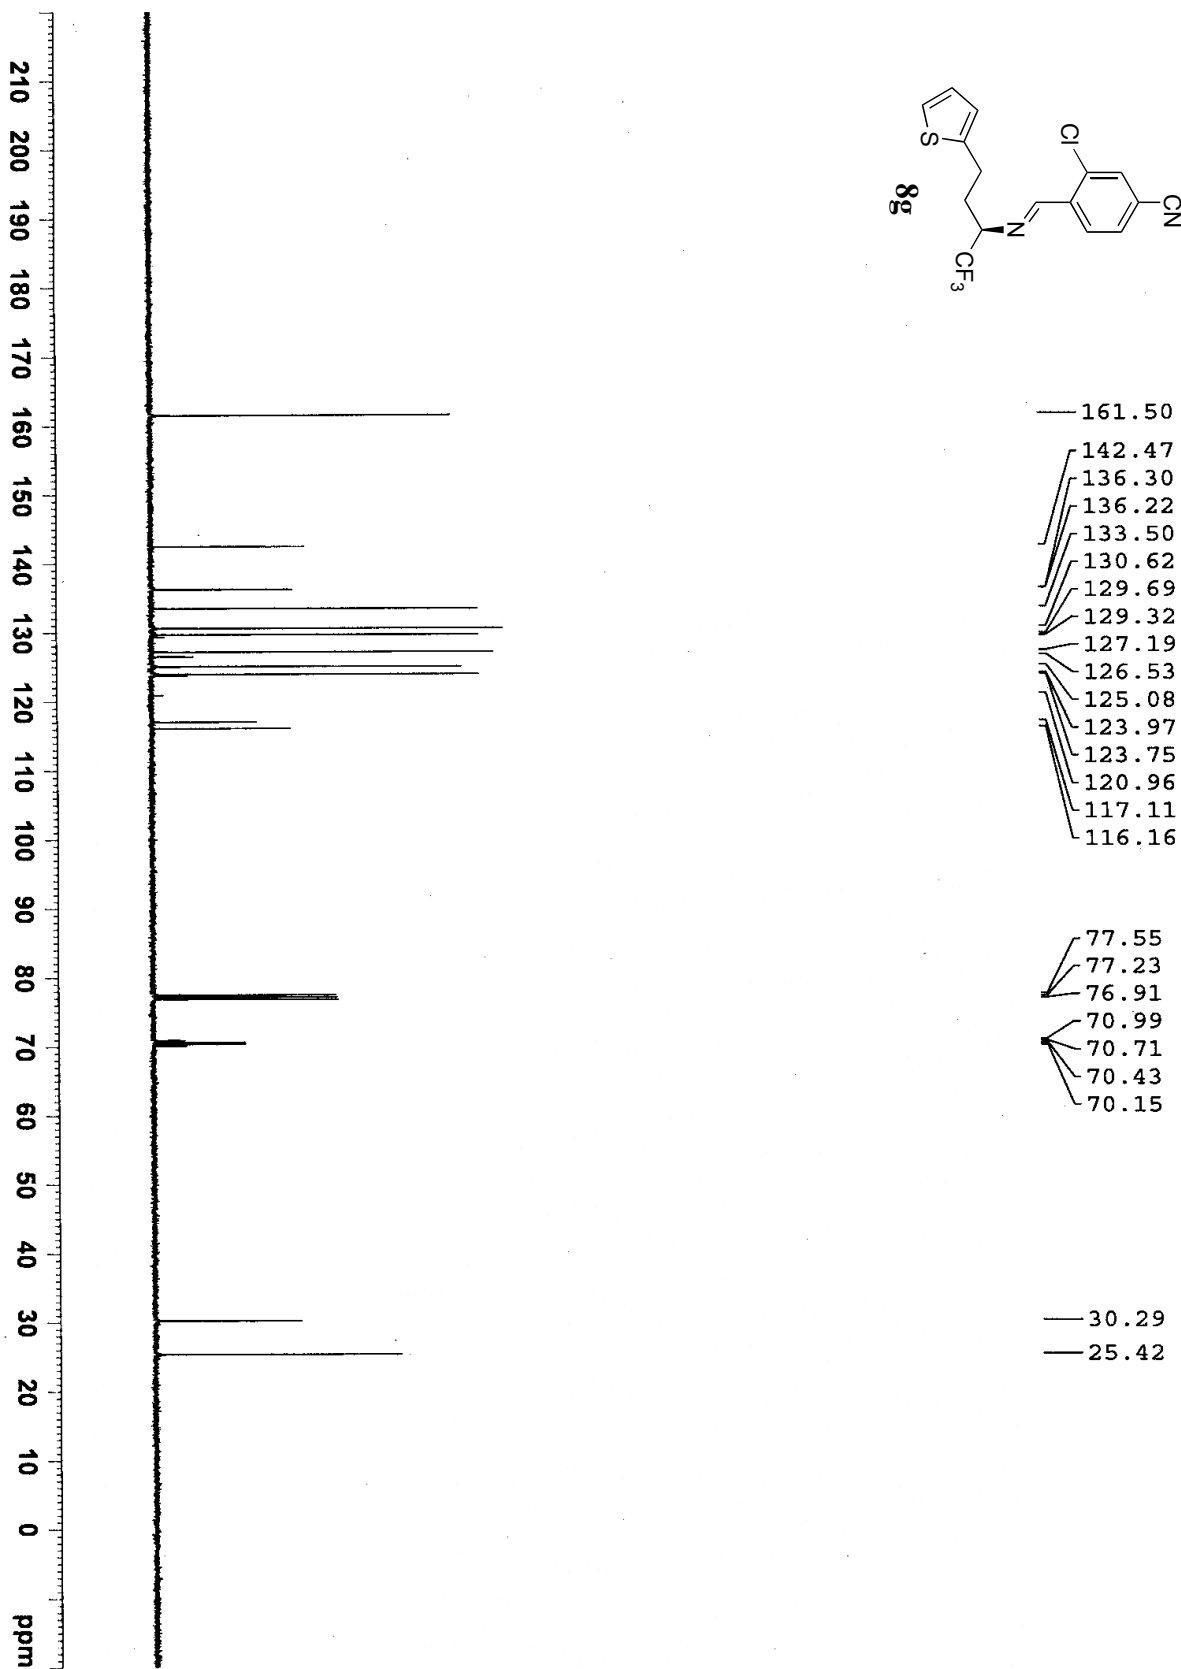

Table 2, entry 7

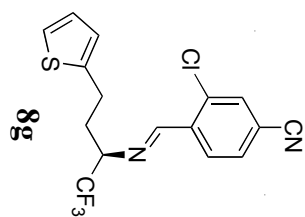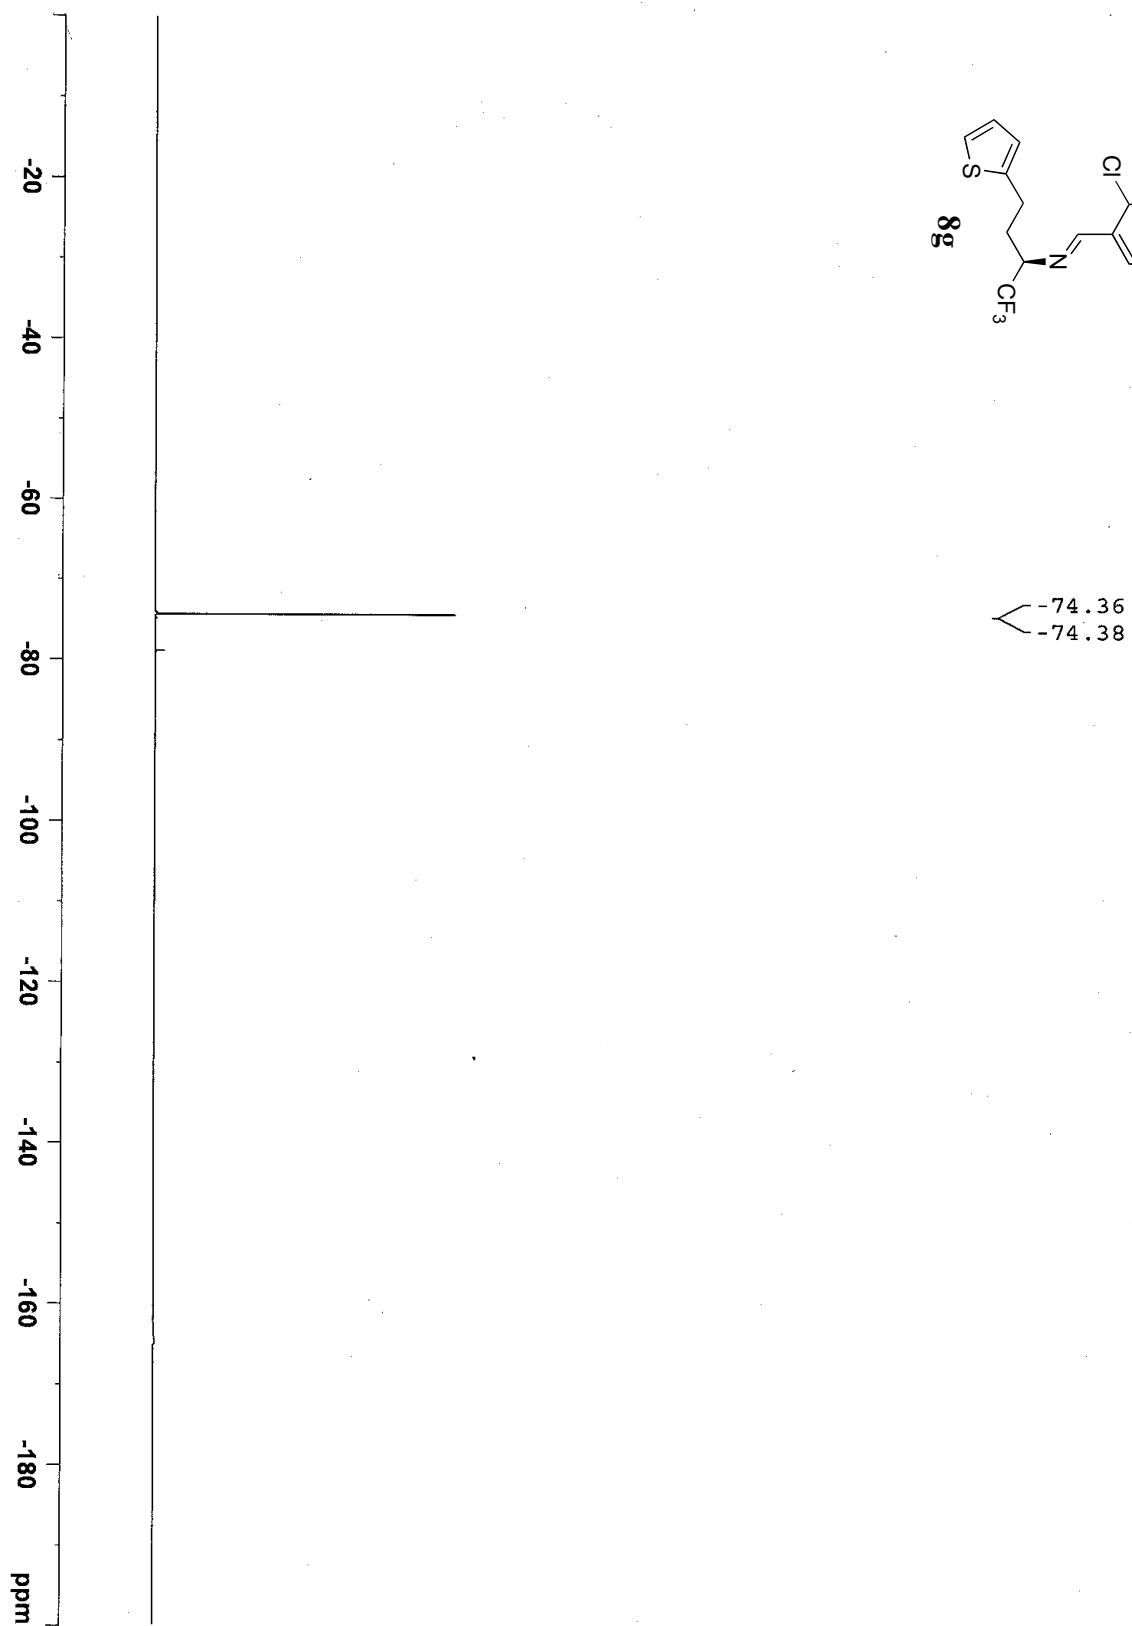

Table 2, entry 8

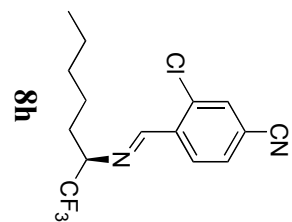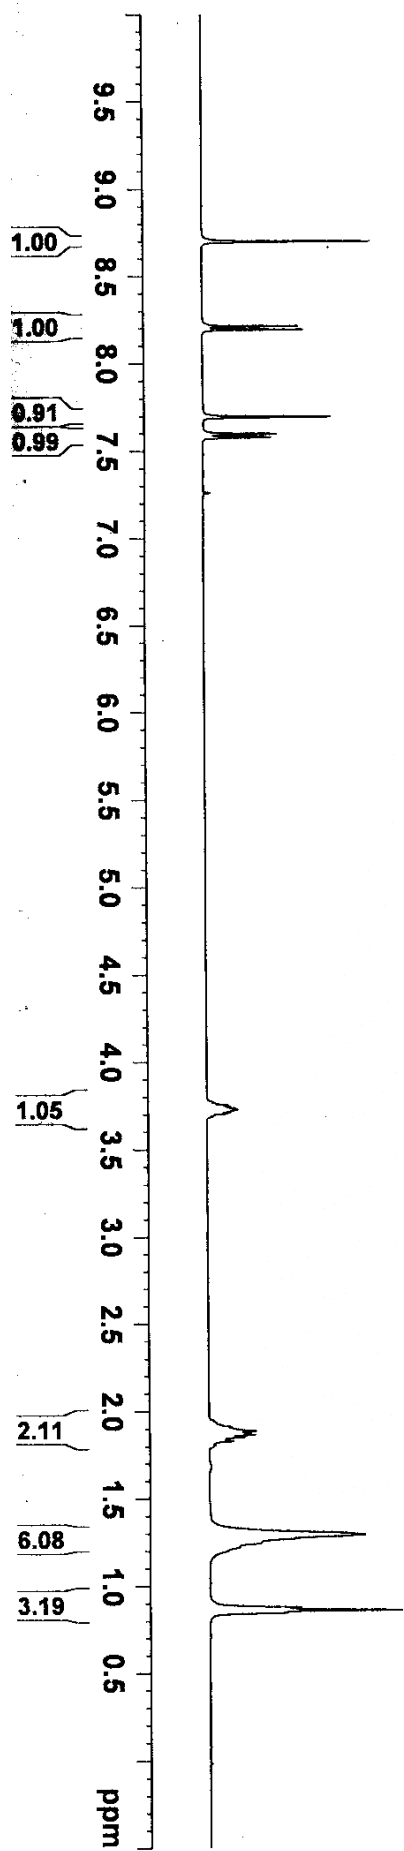

Table 2, entry 8

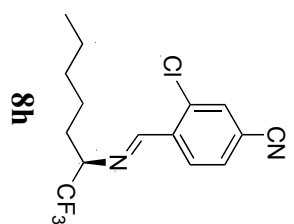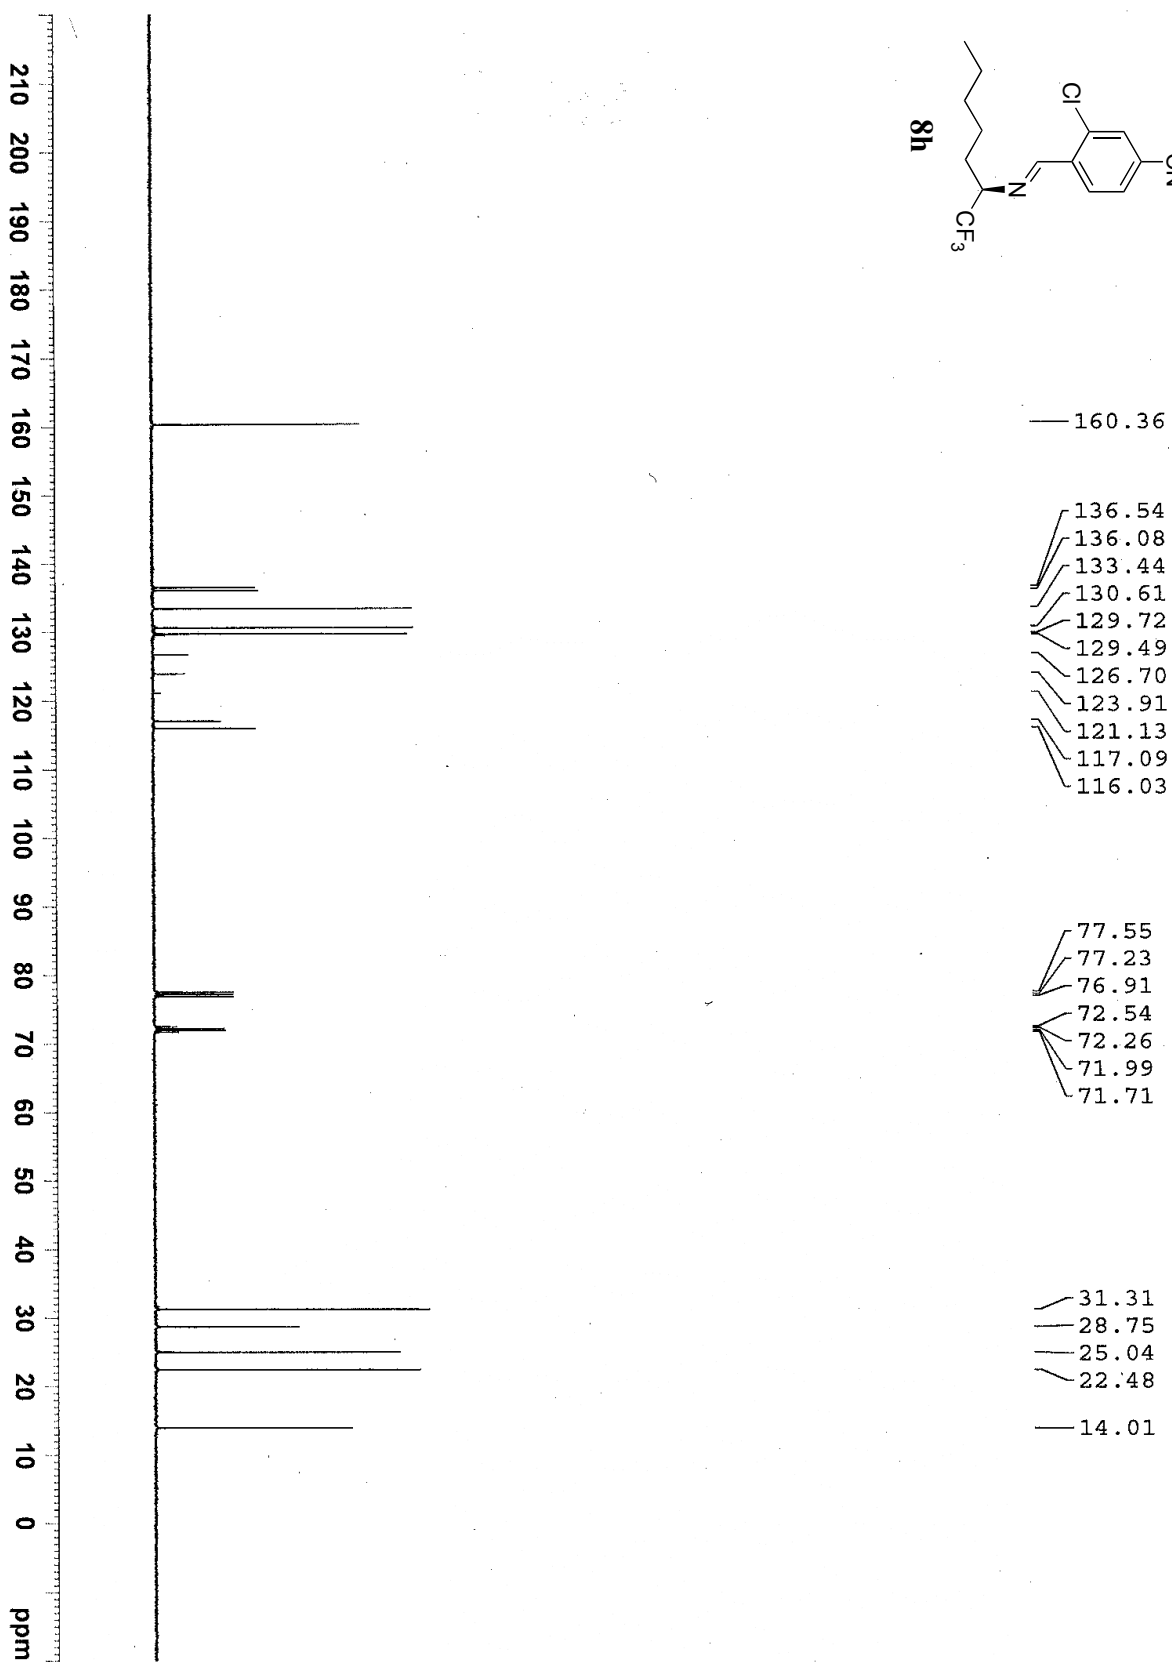

Table 2, entry 8

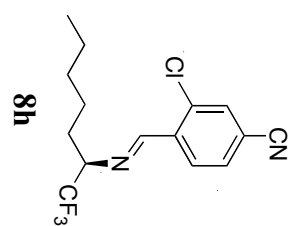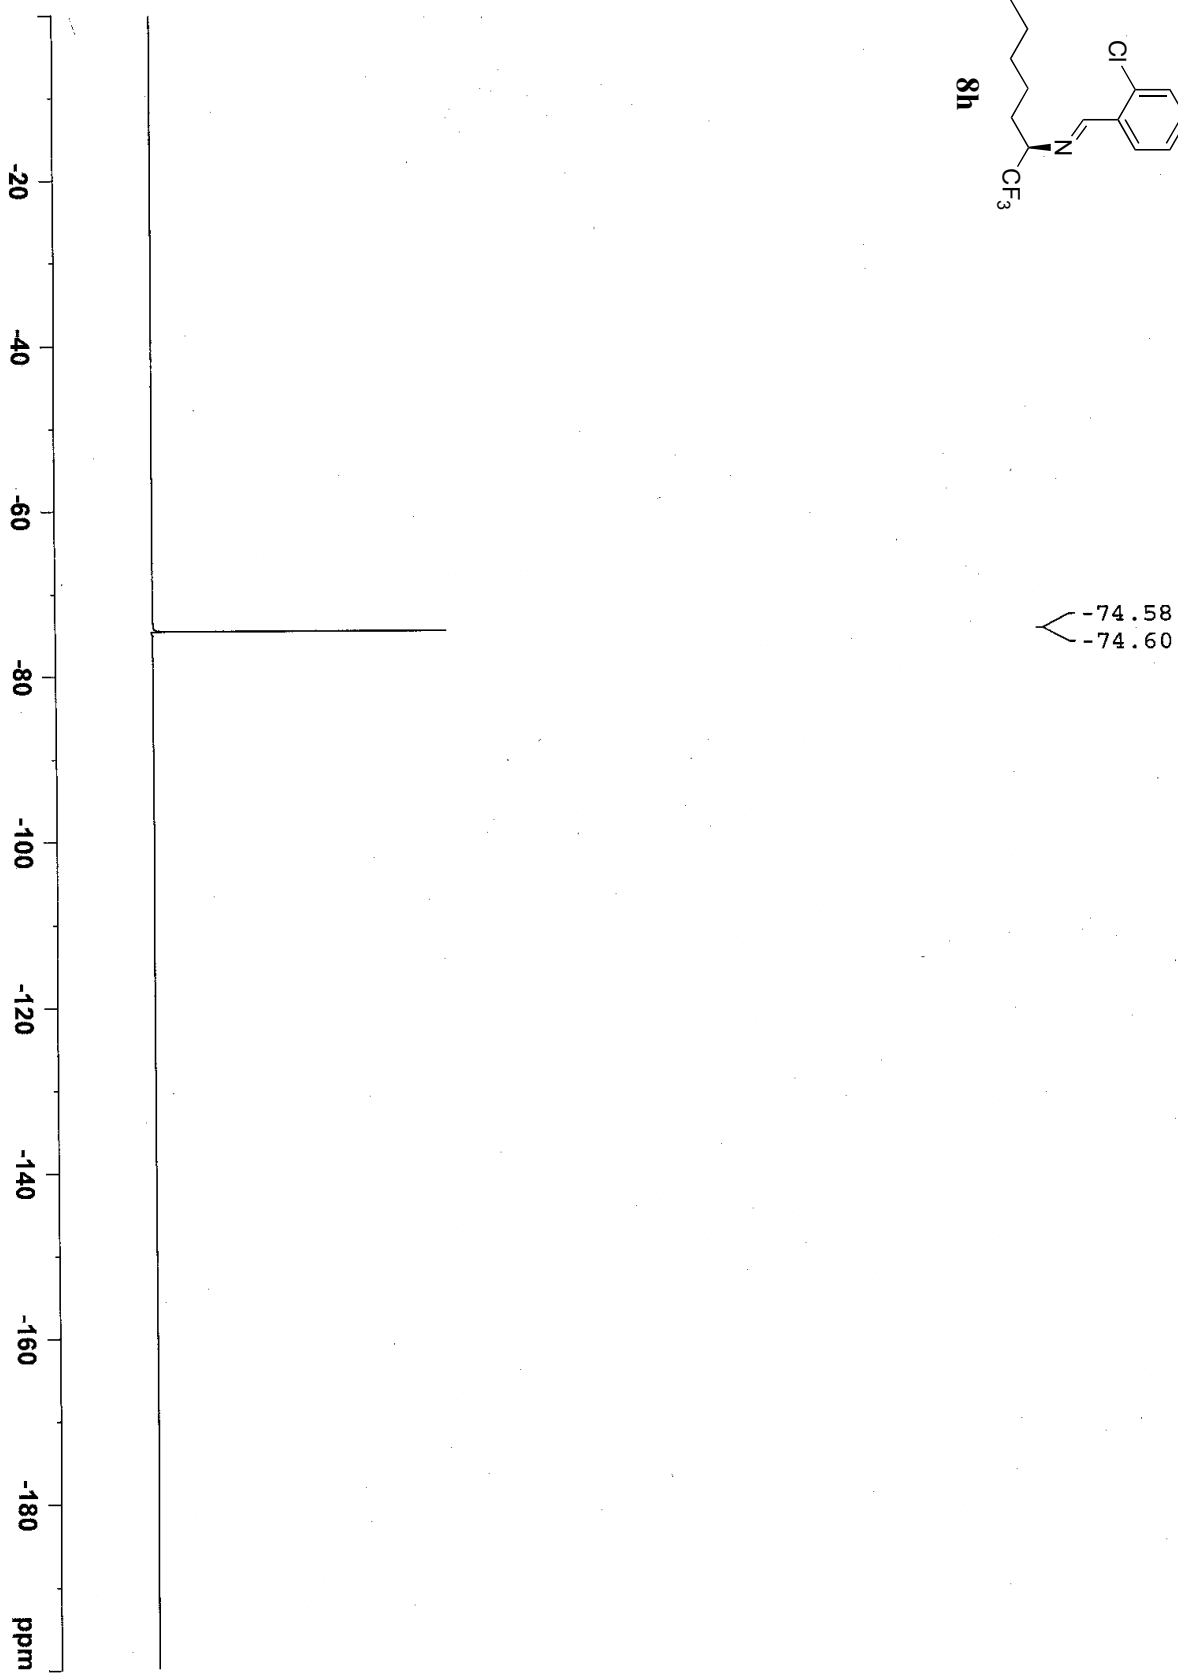

Table 2, entry 9

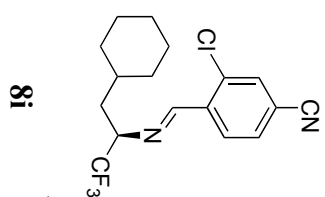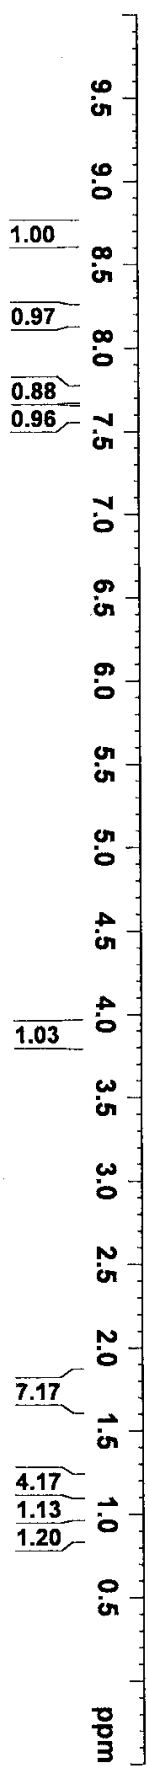

Table 2, entry 9

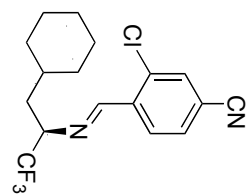

8i

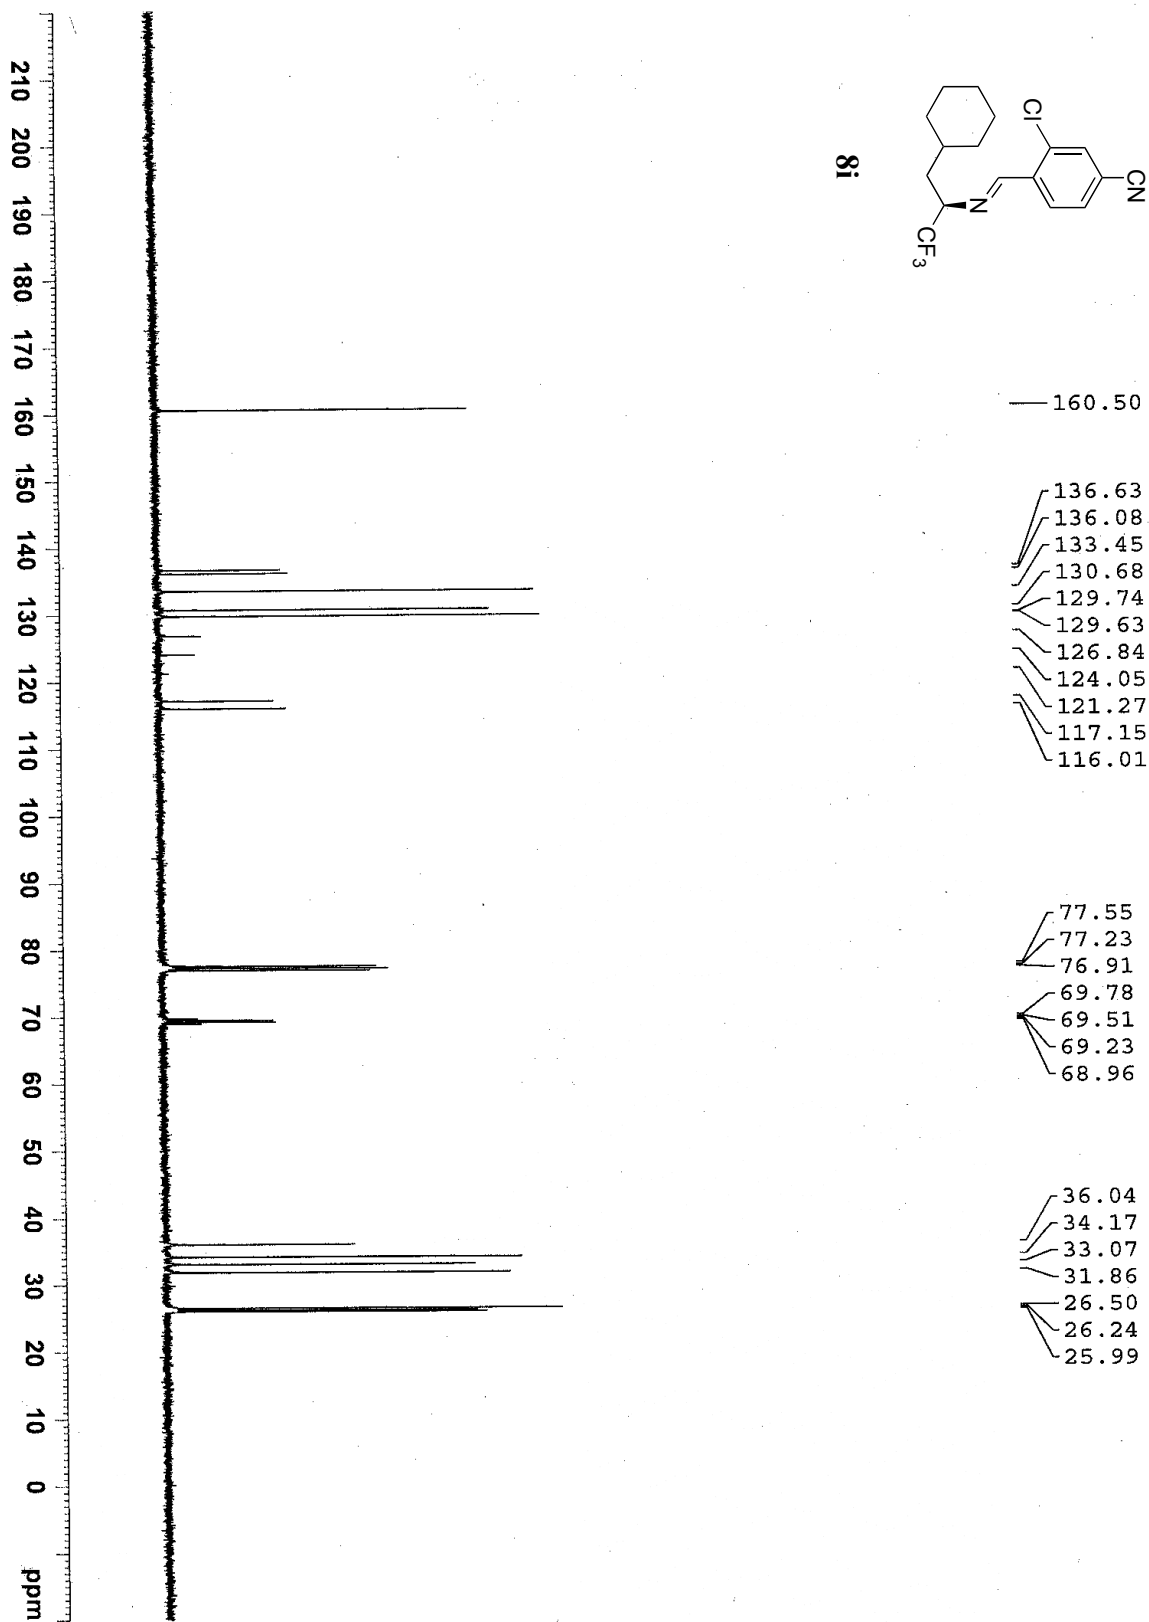



Table 2, entry 9

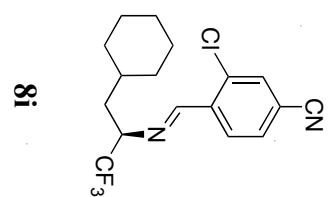

-74.63  
-74.65

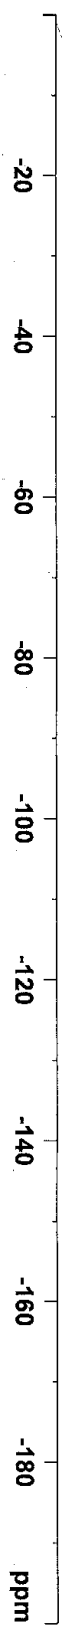

Table 2, entry 10

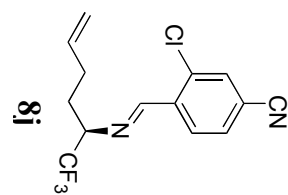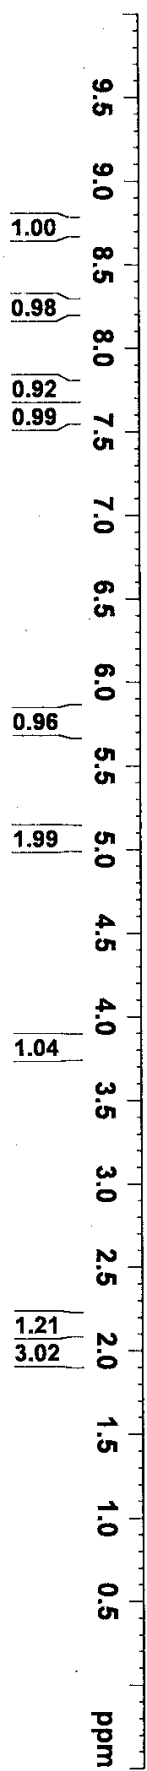

Table 2, entry 10

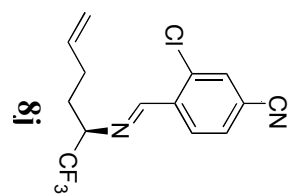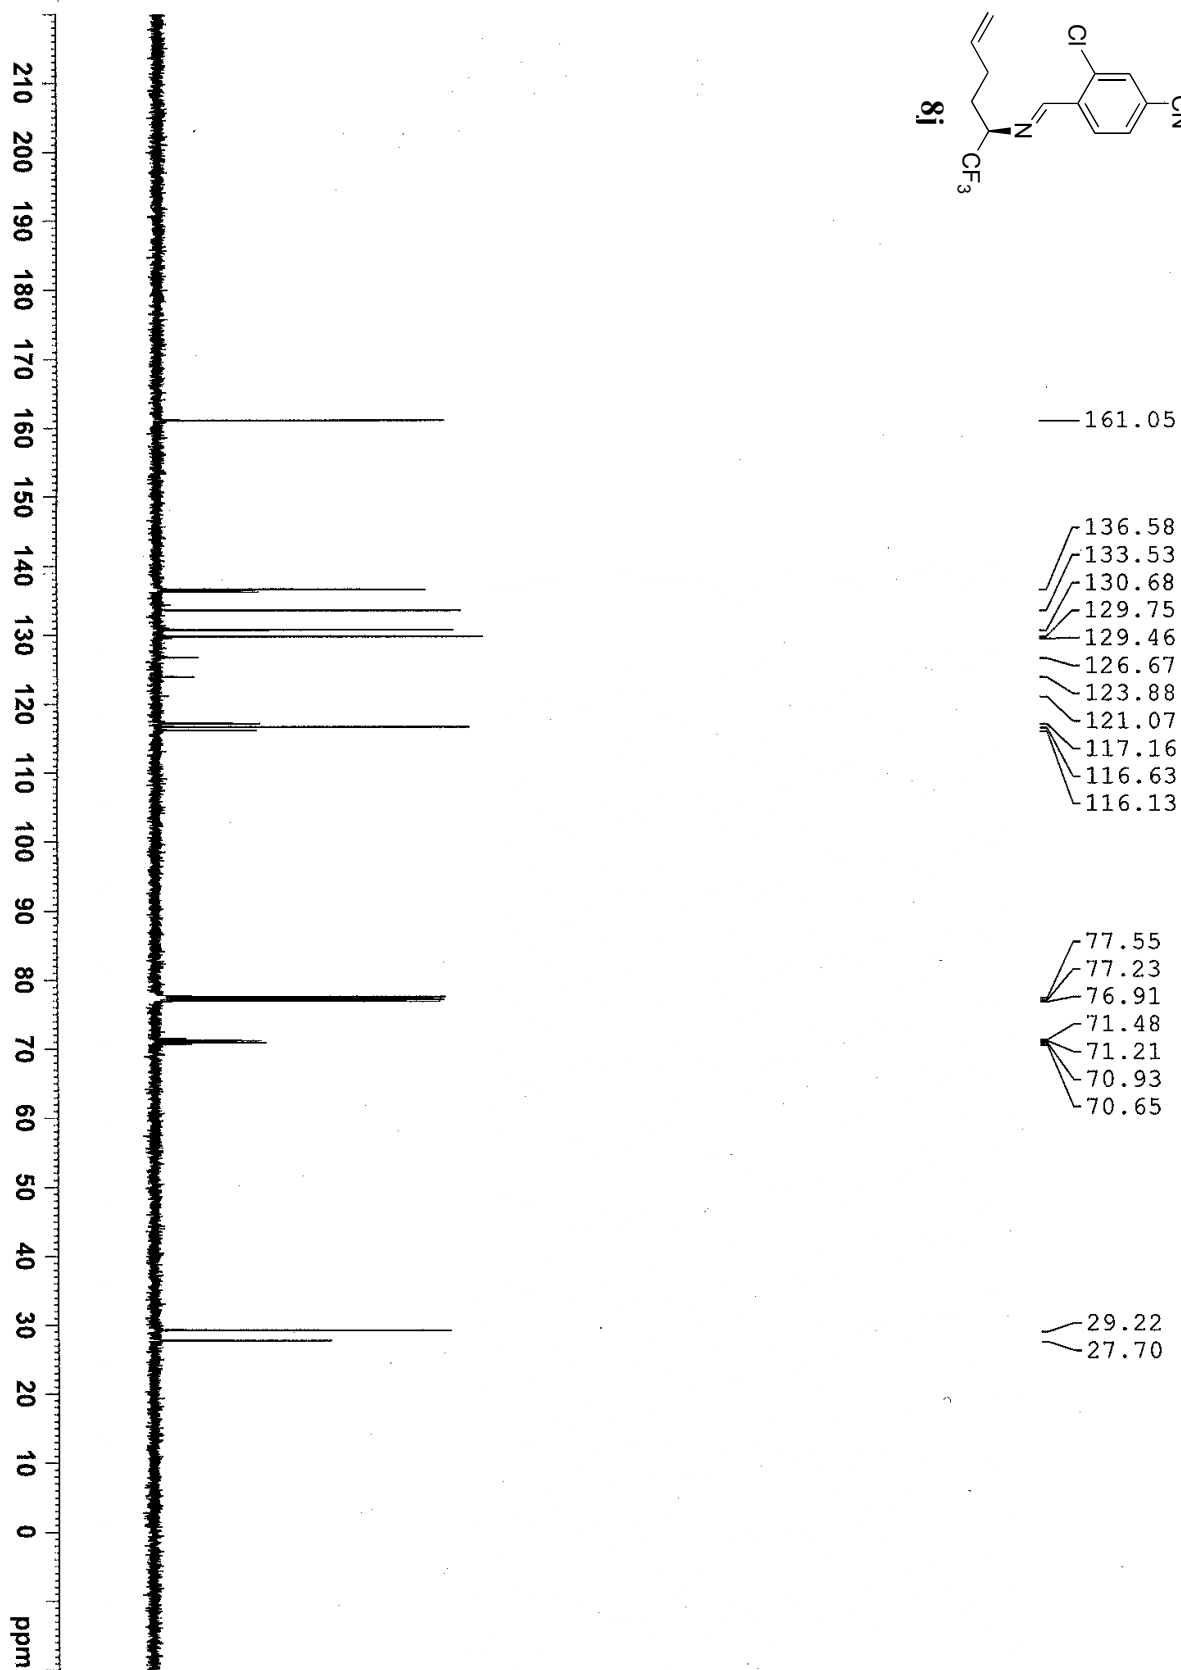

Table 2, entry 10

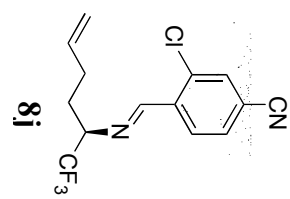

-74.53  
-74.55

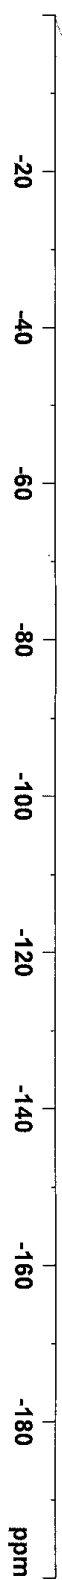

Table 2, entry 11

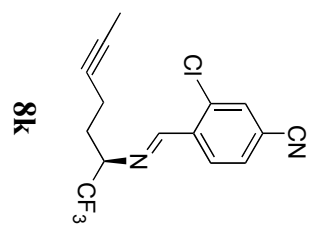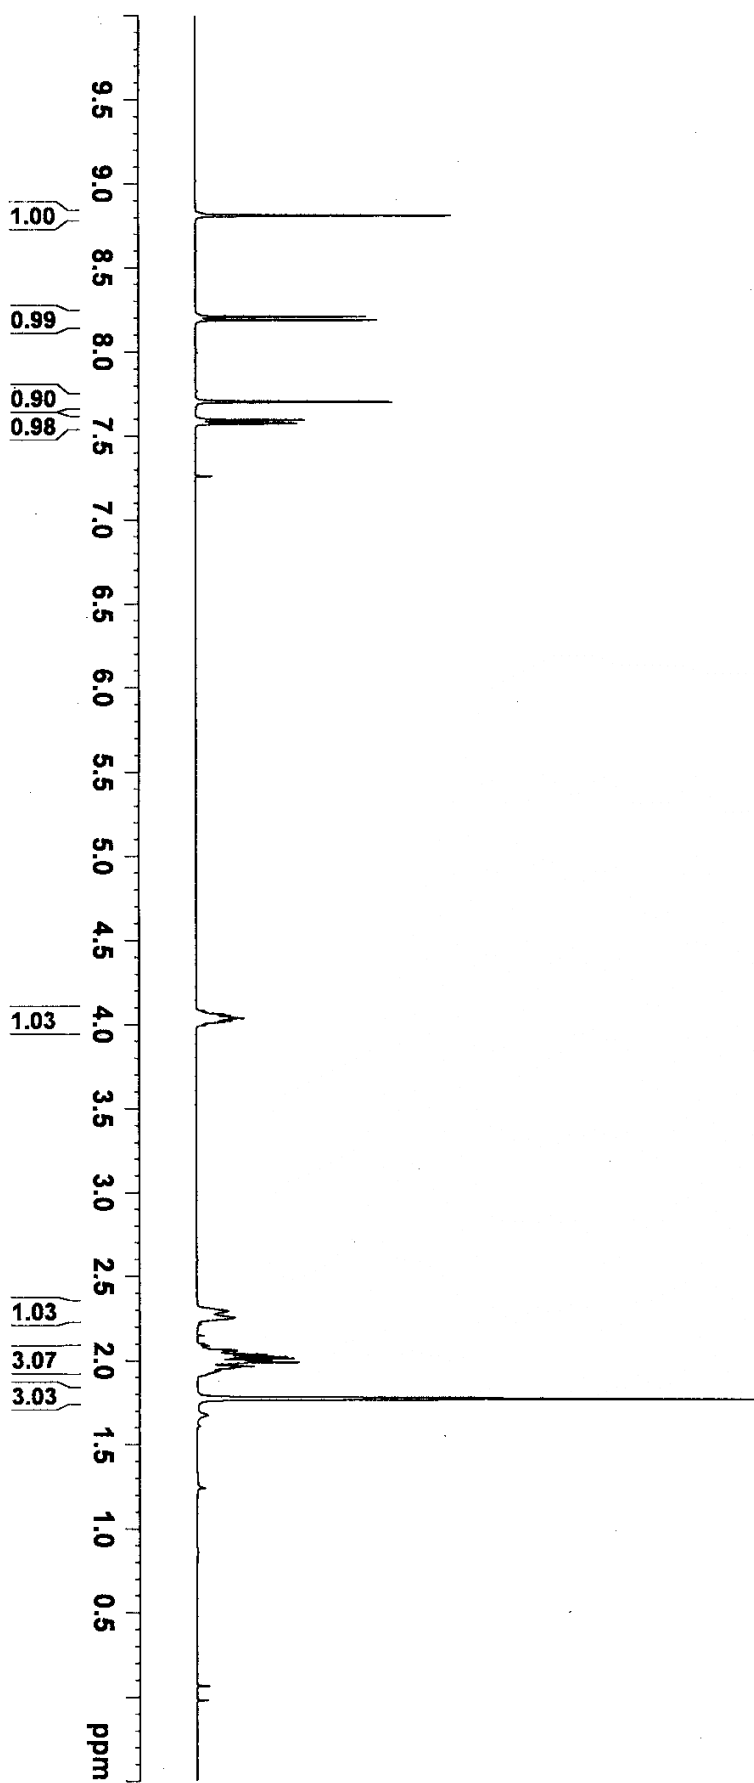

Table 2, entry 11

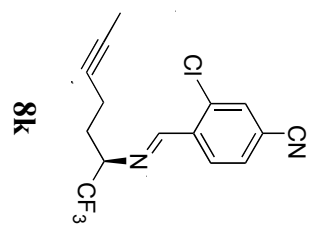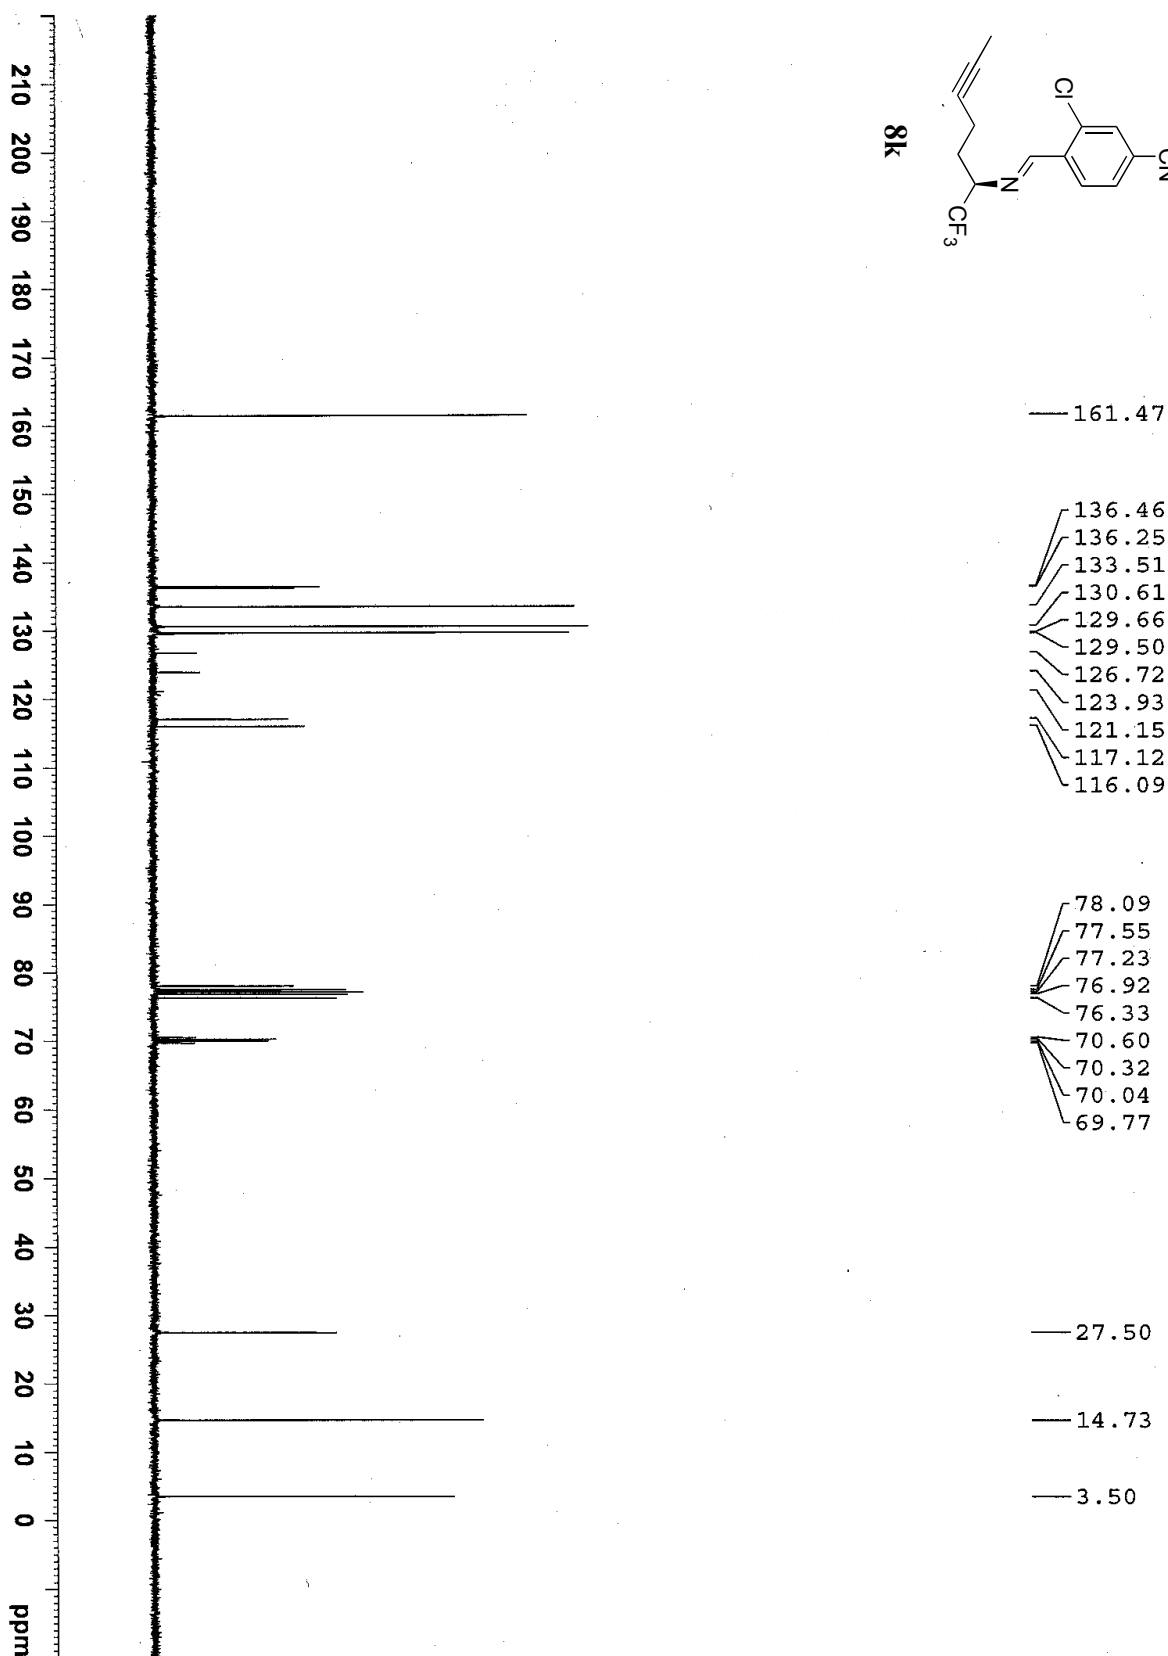

Table 2, entry 11

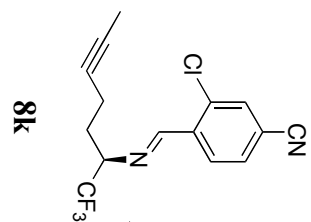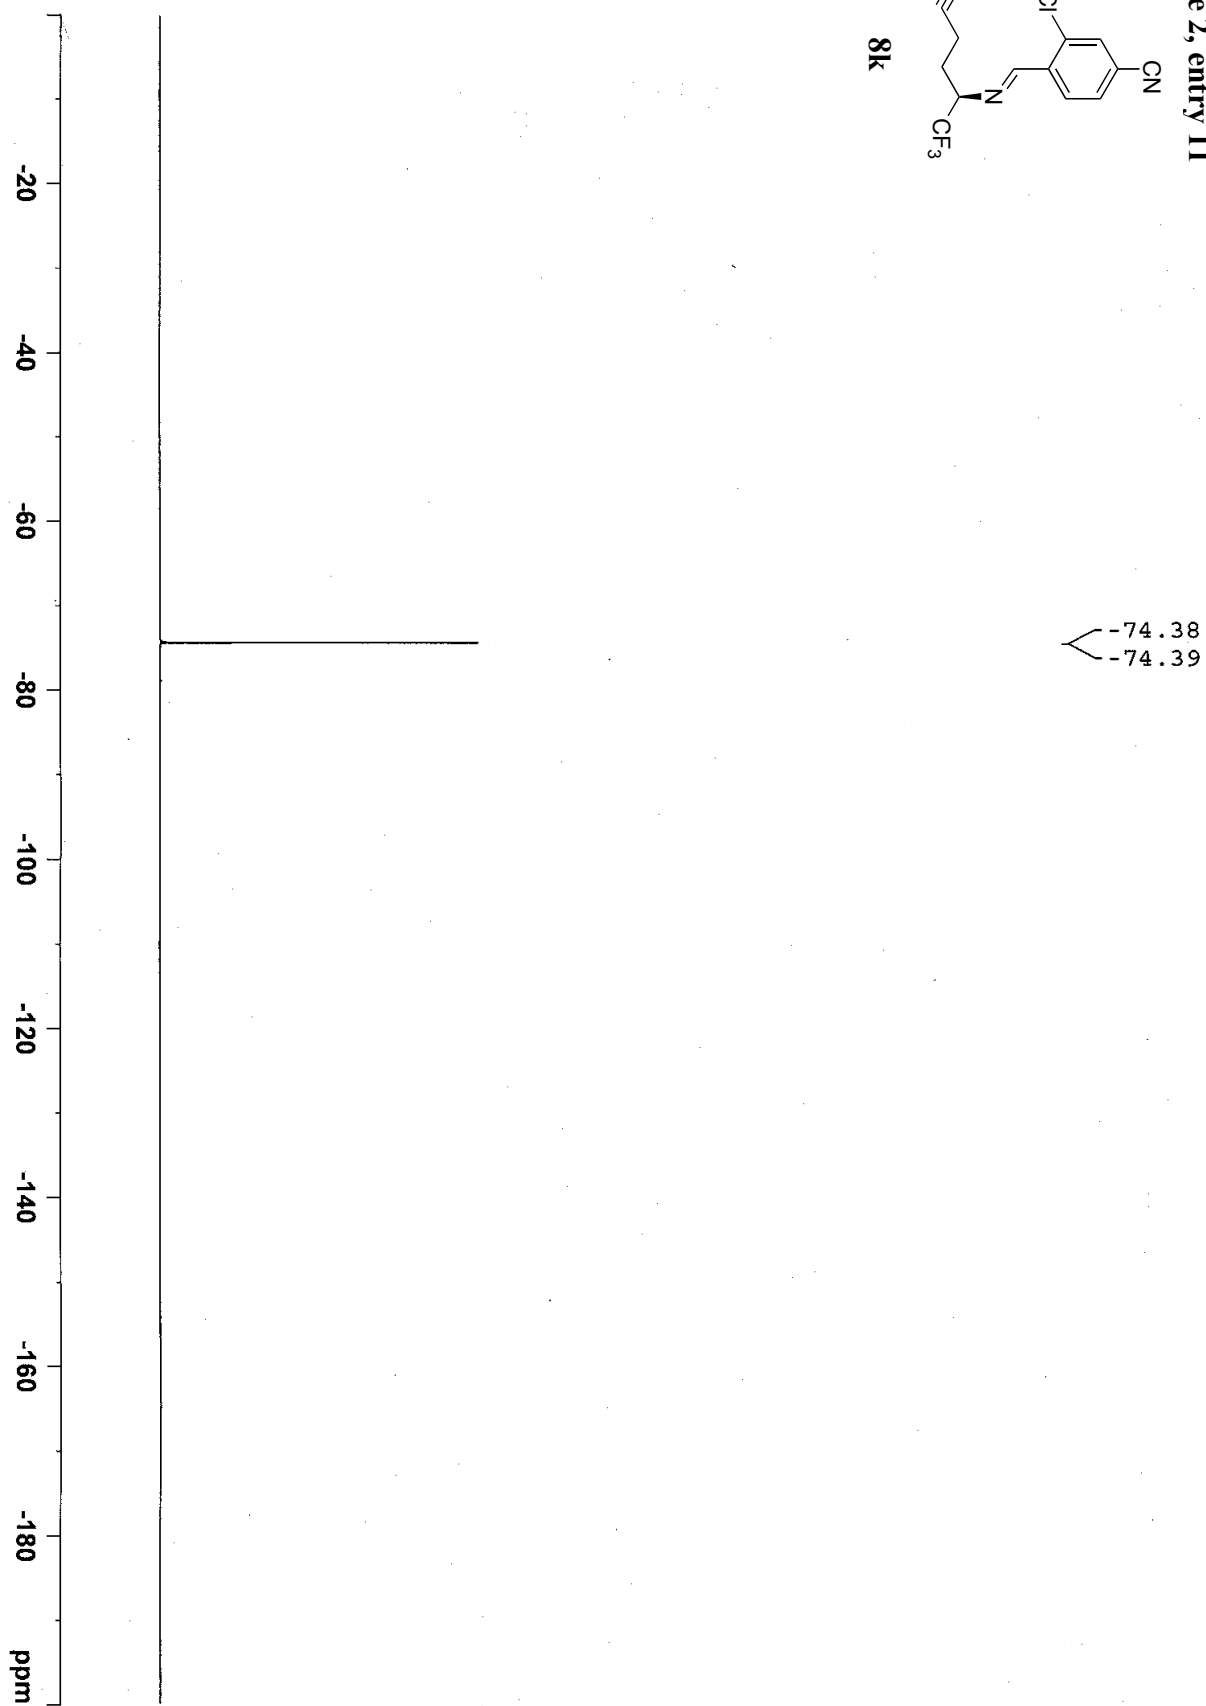

Table 2, entry 12

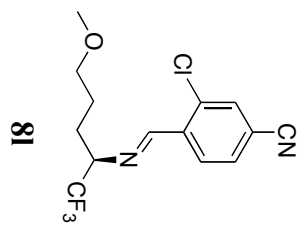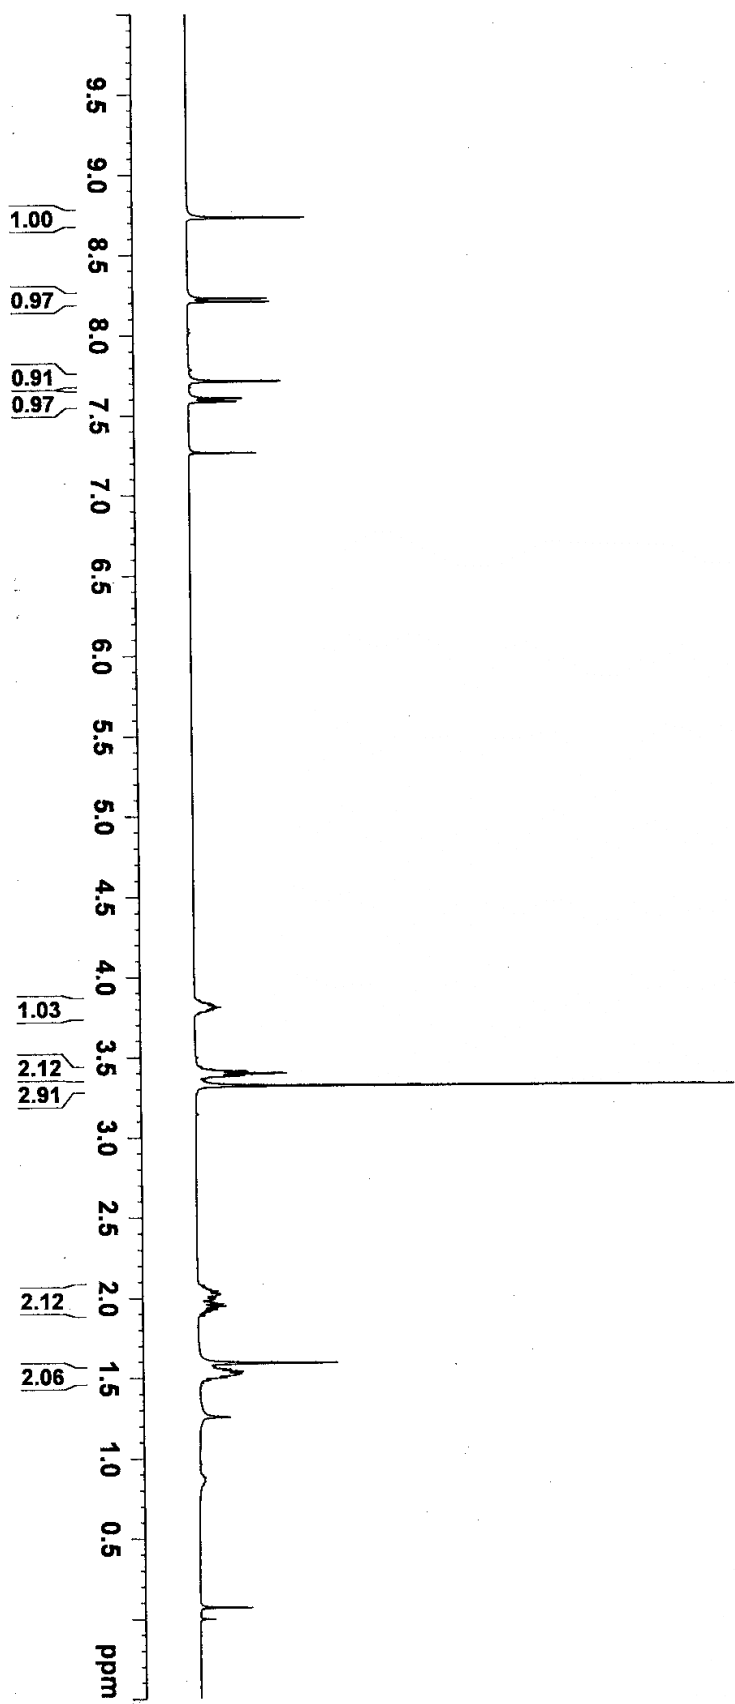



Table 2, entry 12

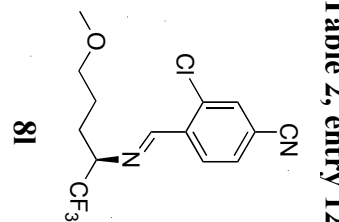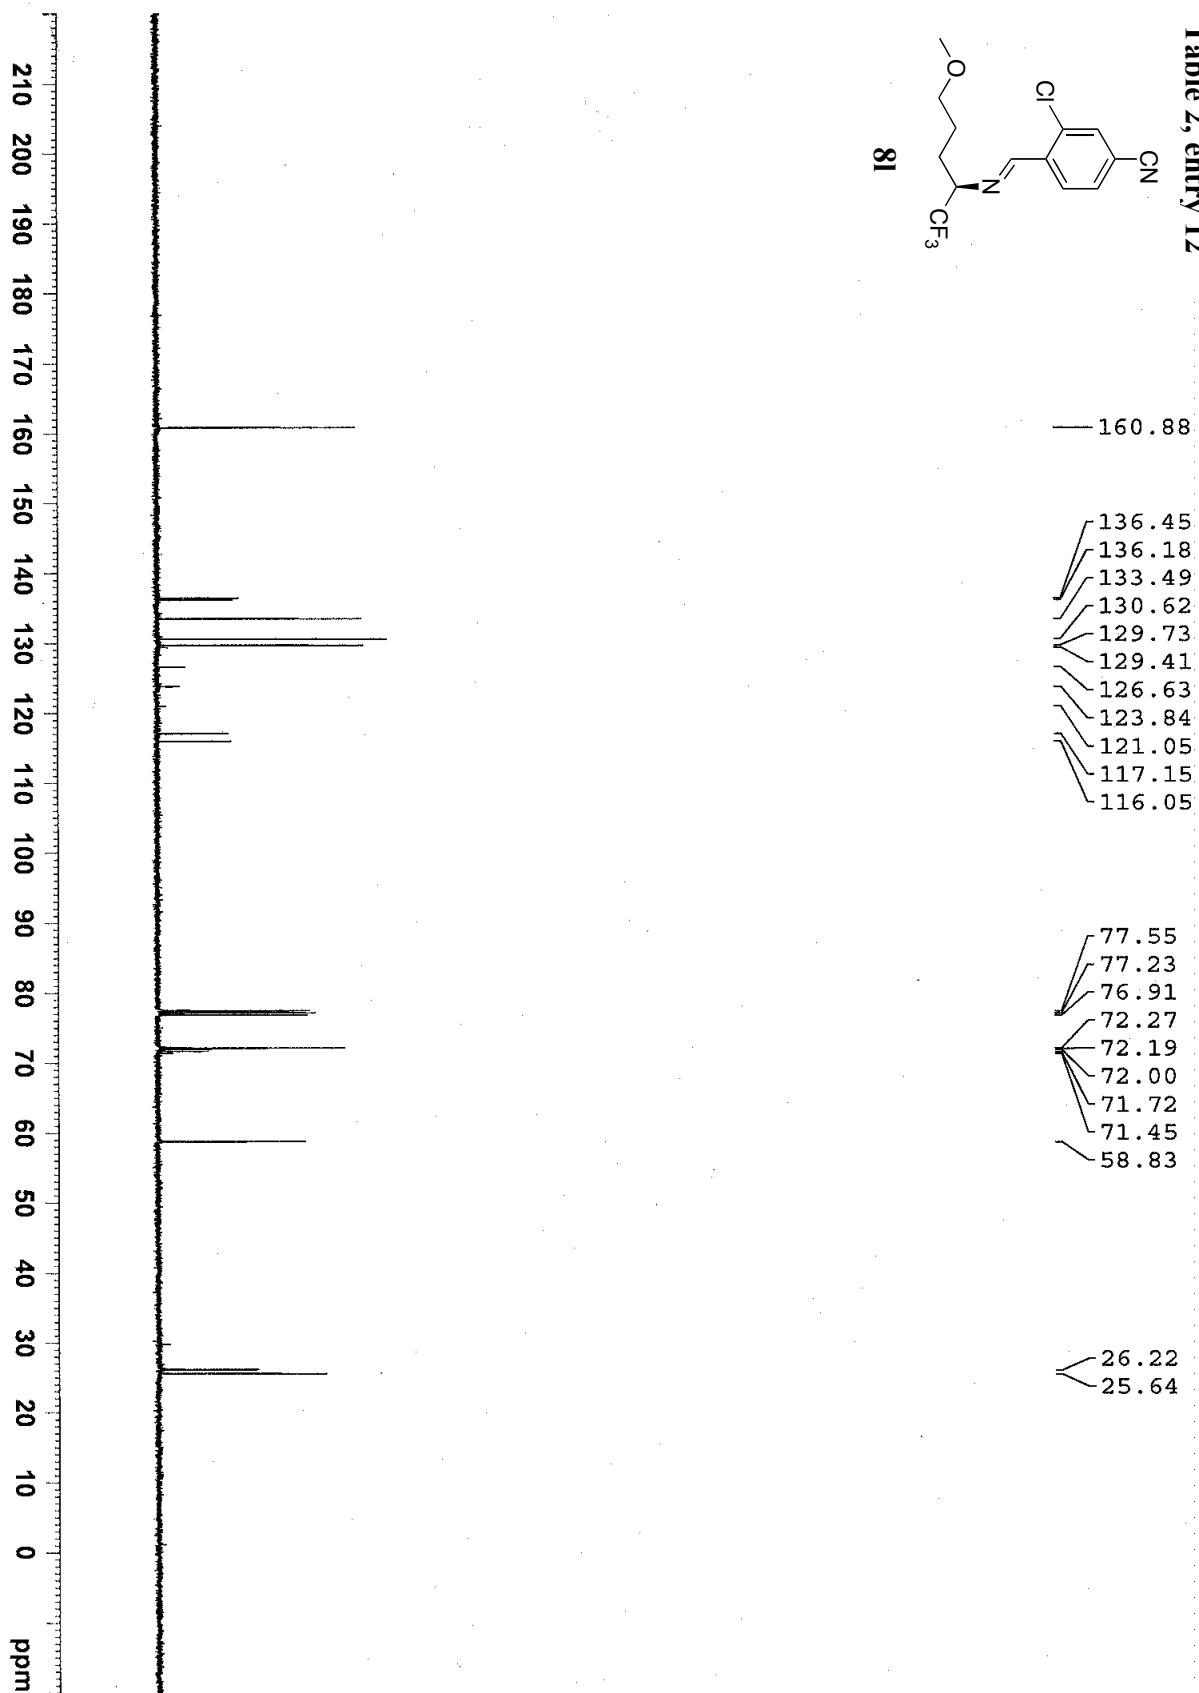

Table 2, entry 12

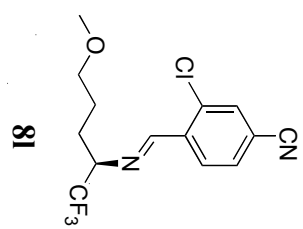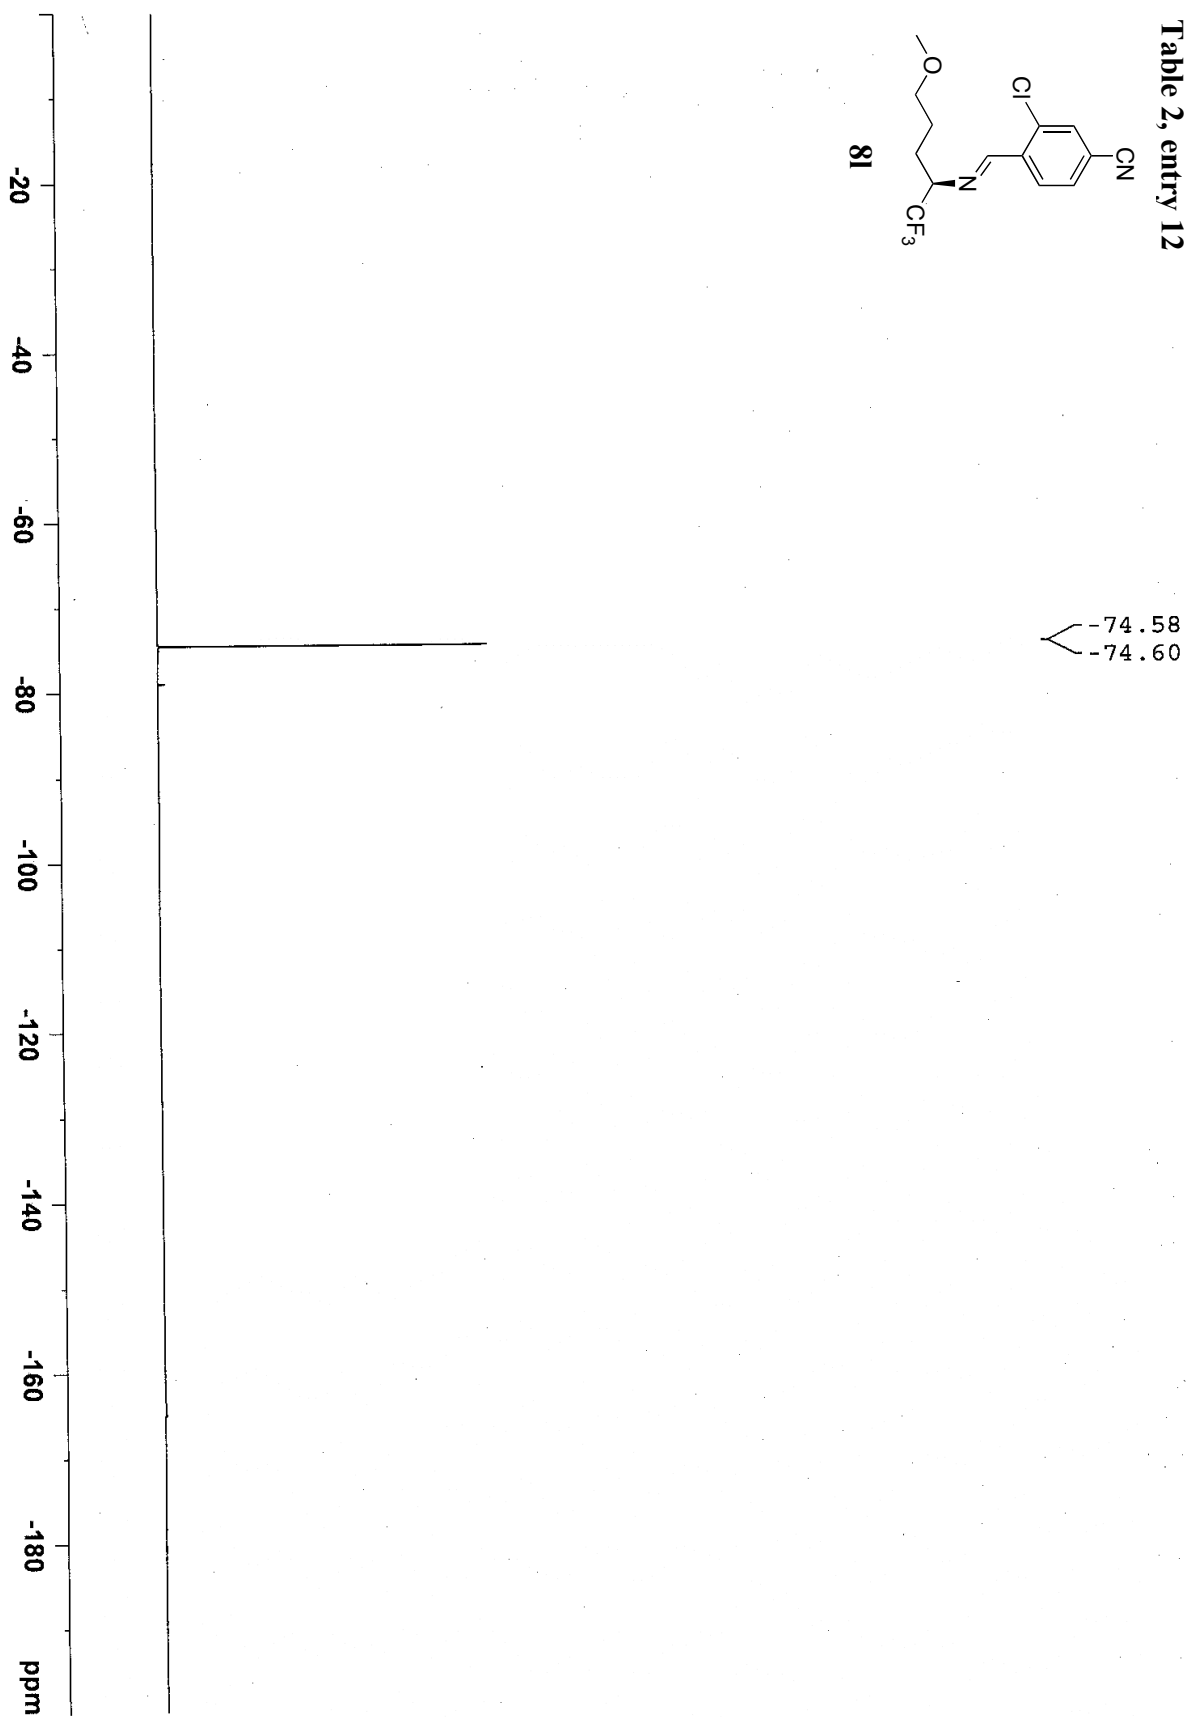

Table 2, entry 13

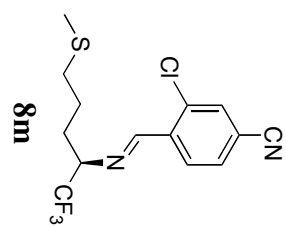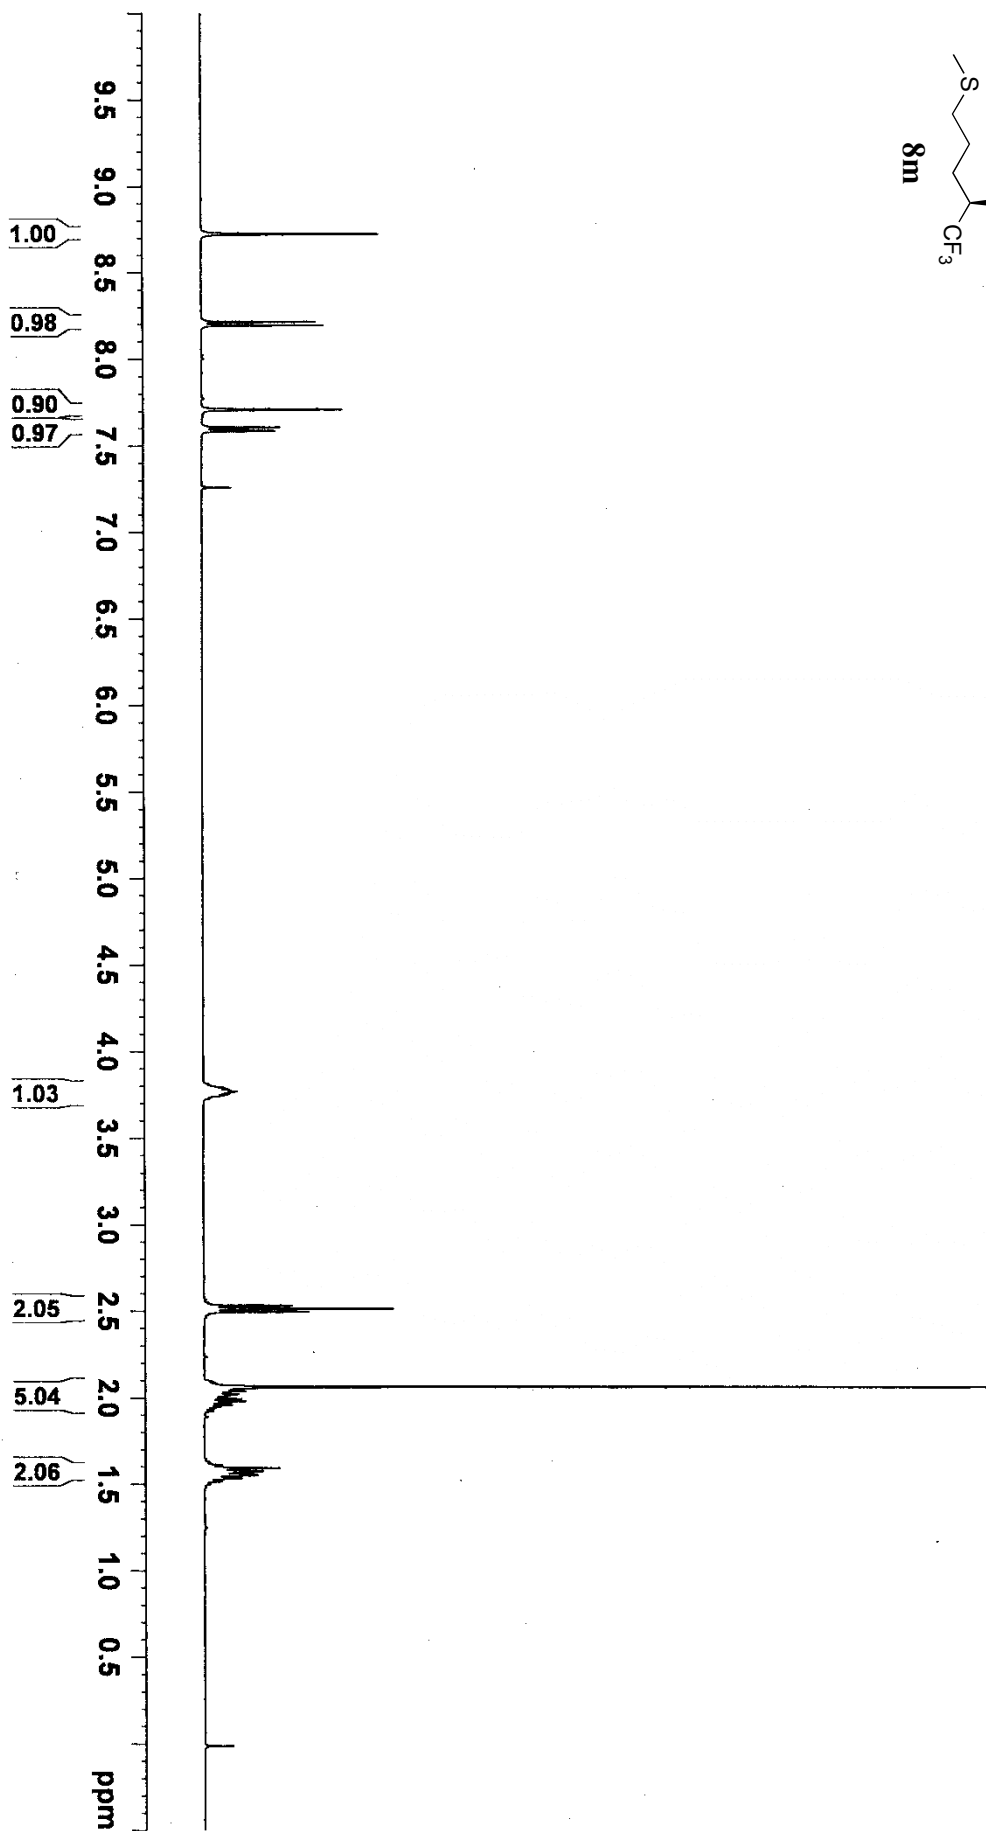

Table 2, entry 13

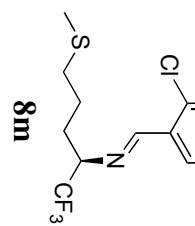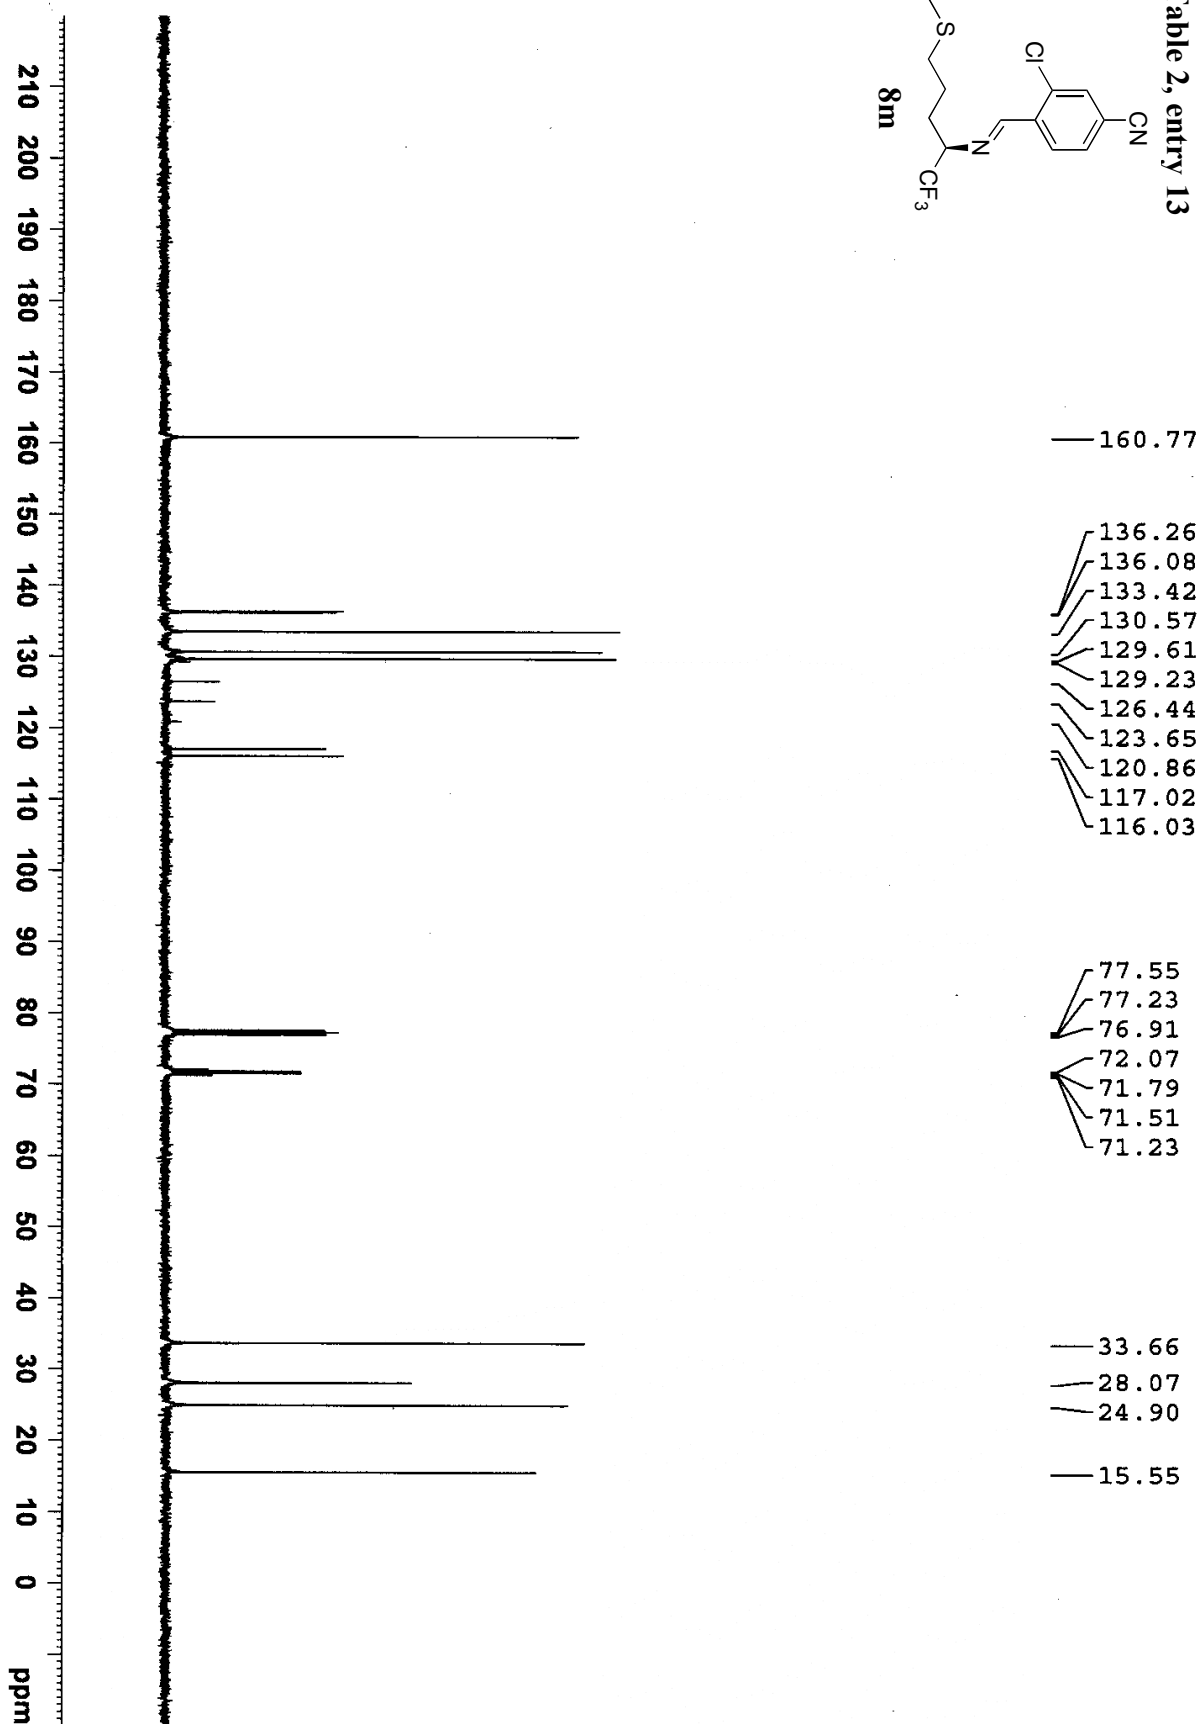

Table 2, entry 13

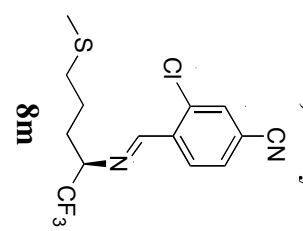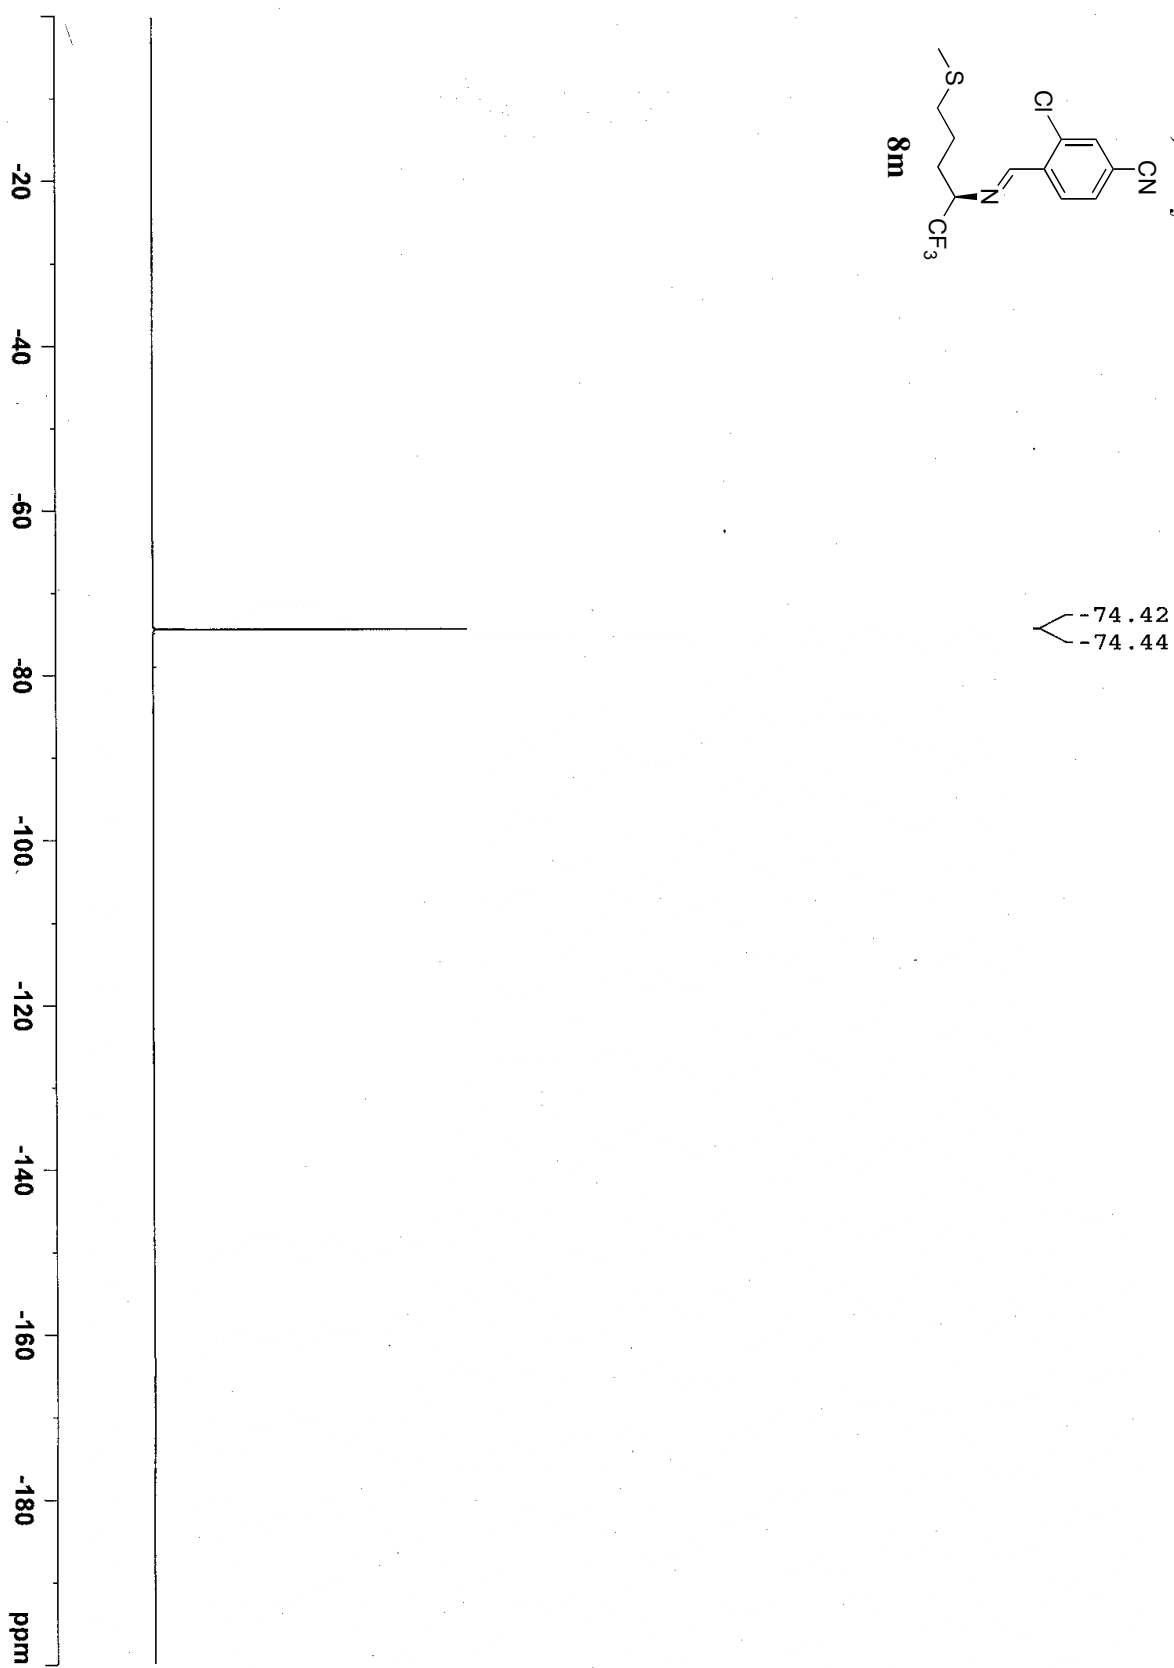

Table 2, entry 14

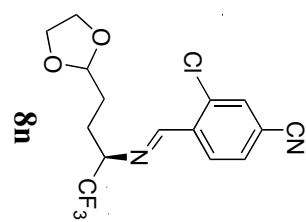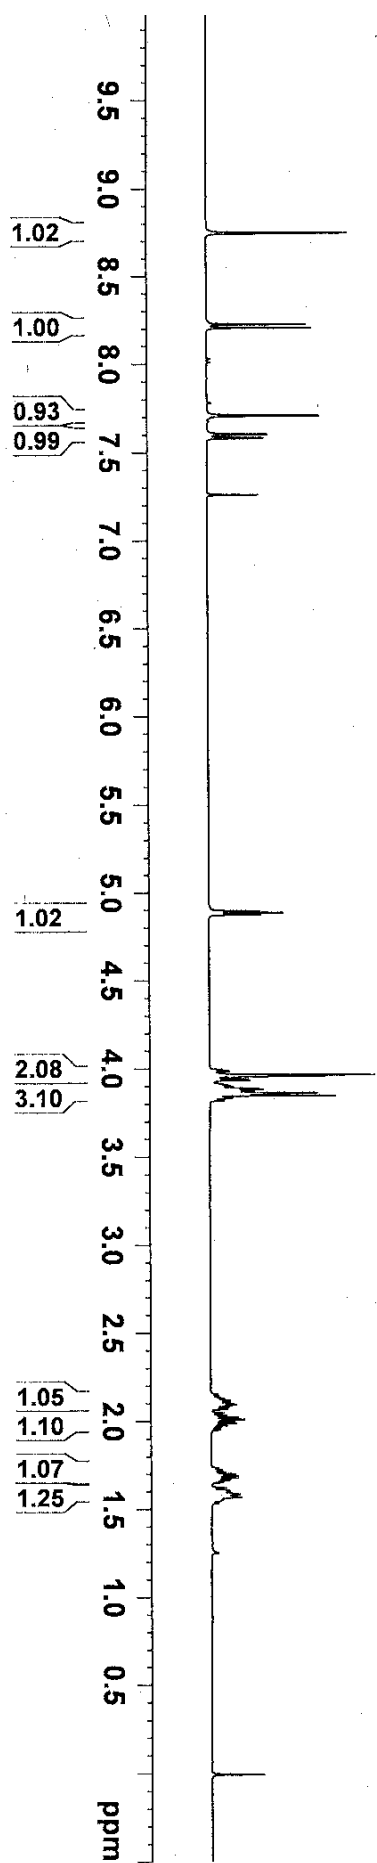

Table 2, entry 14

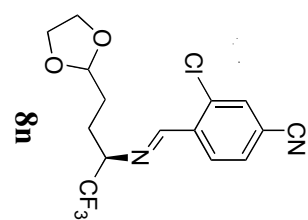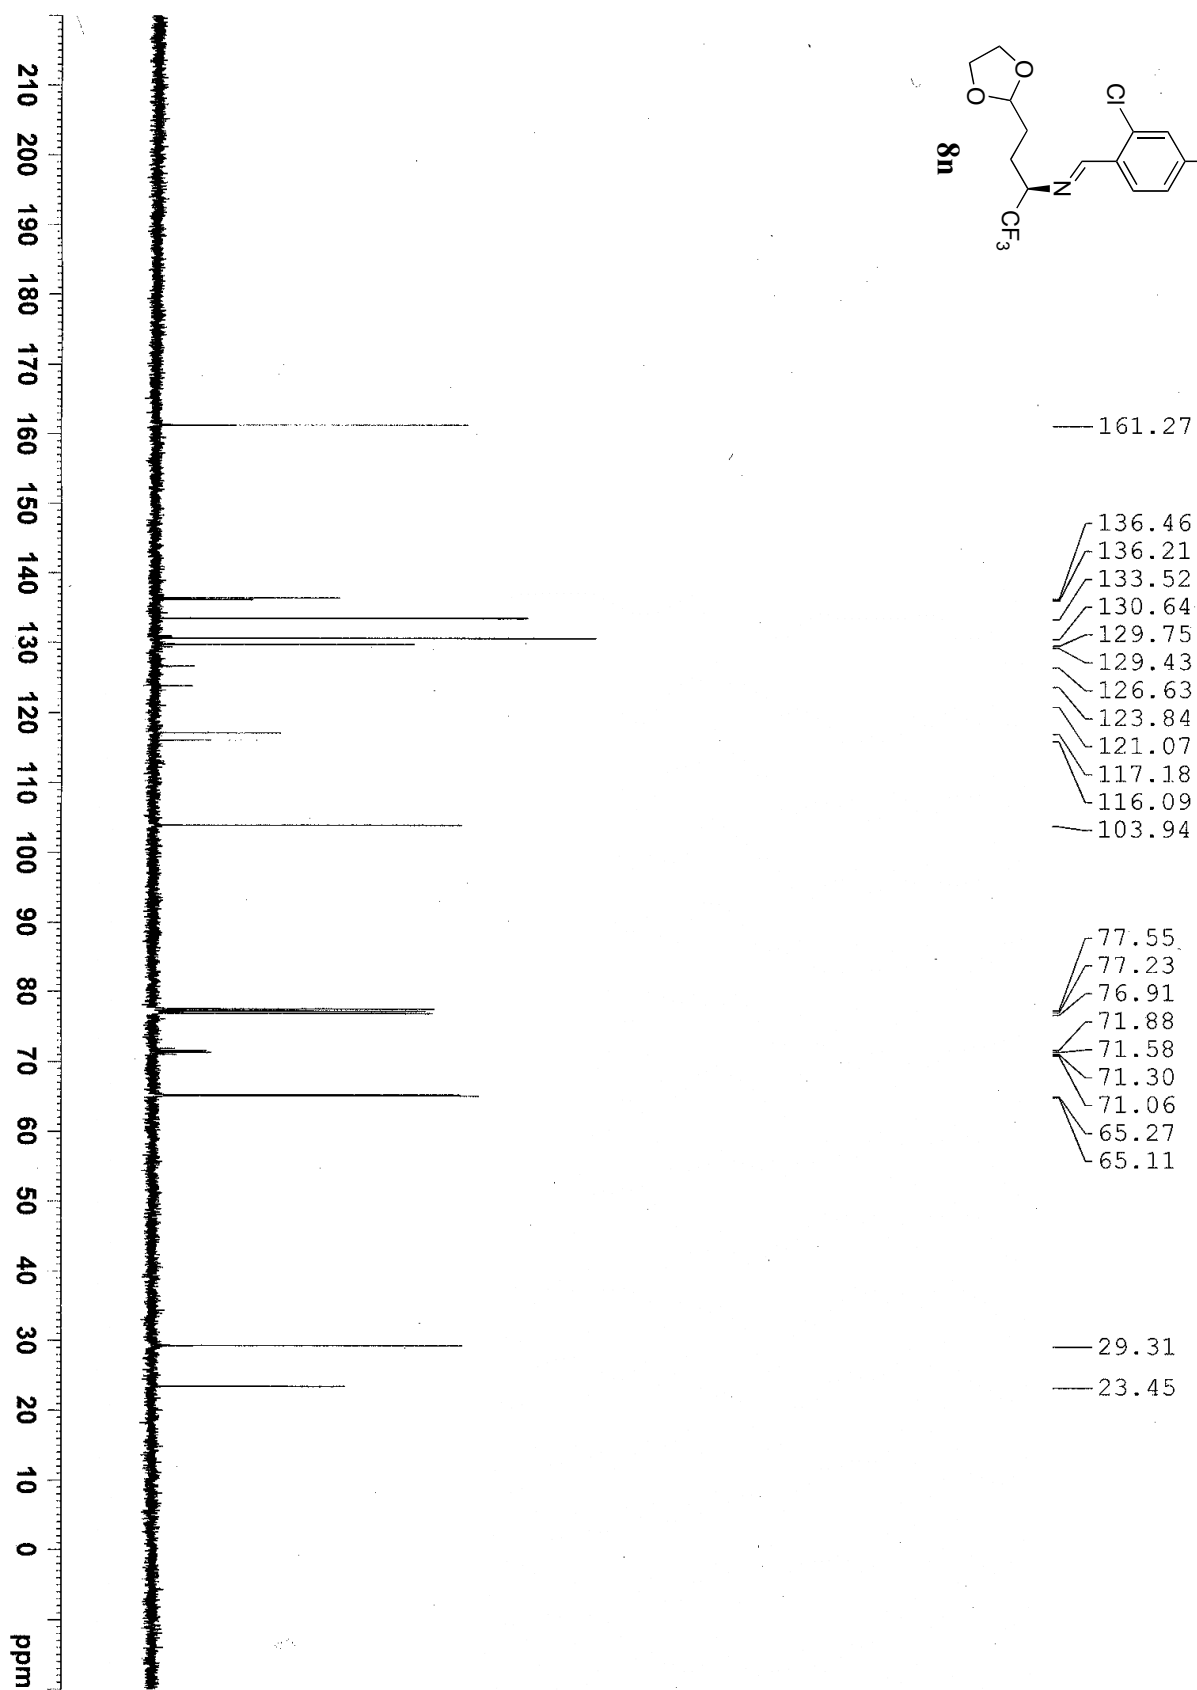

Table 2, entry 14

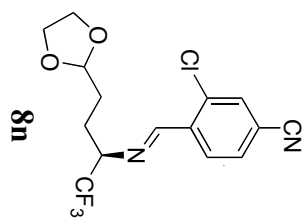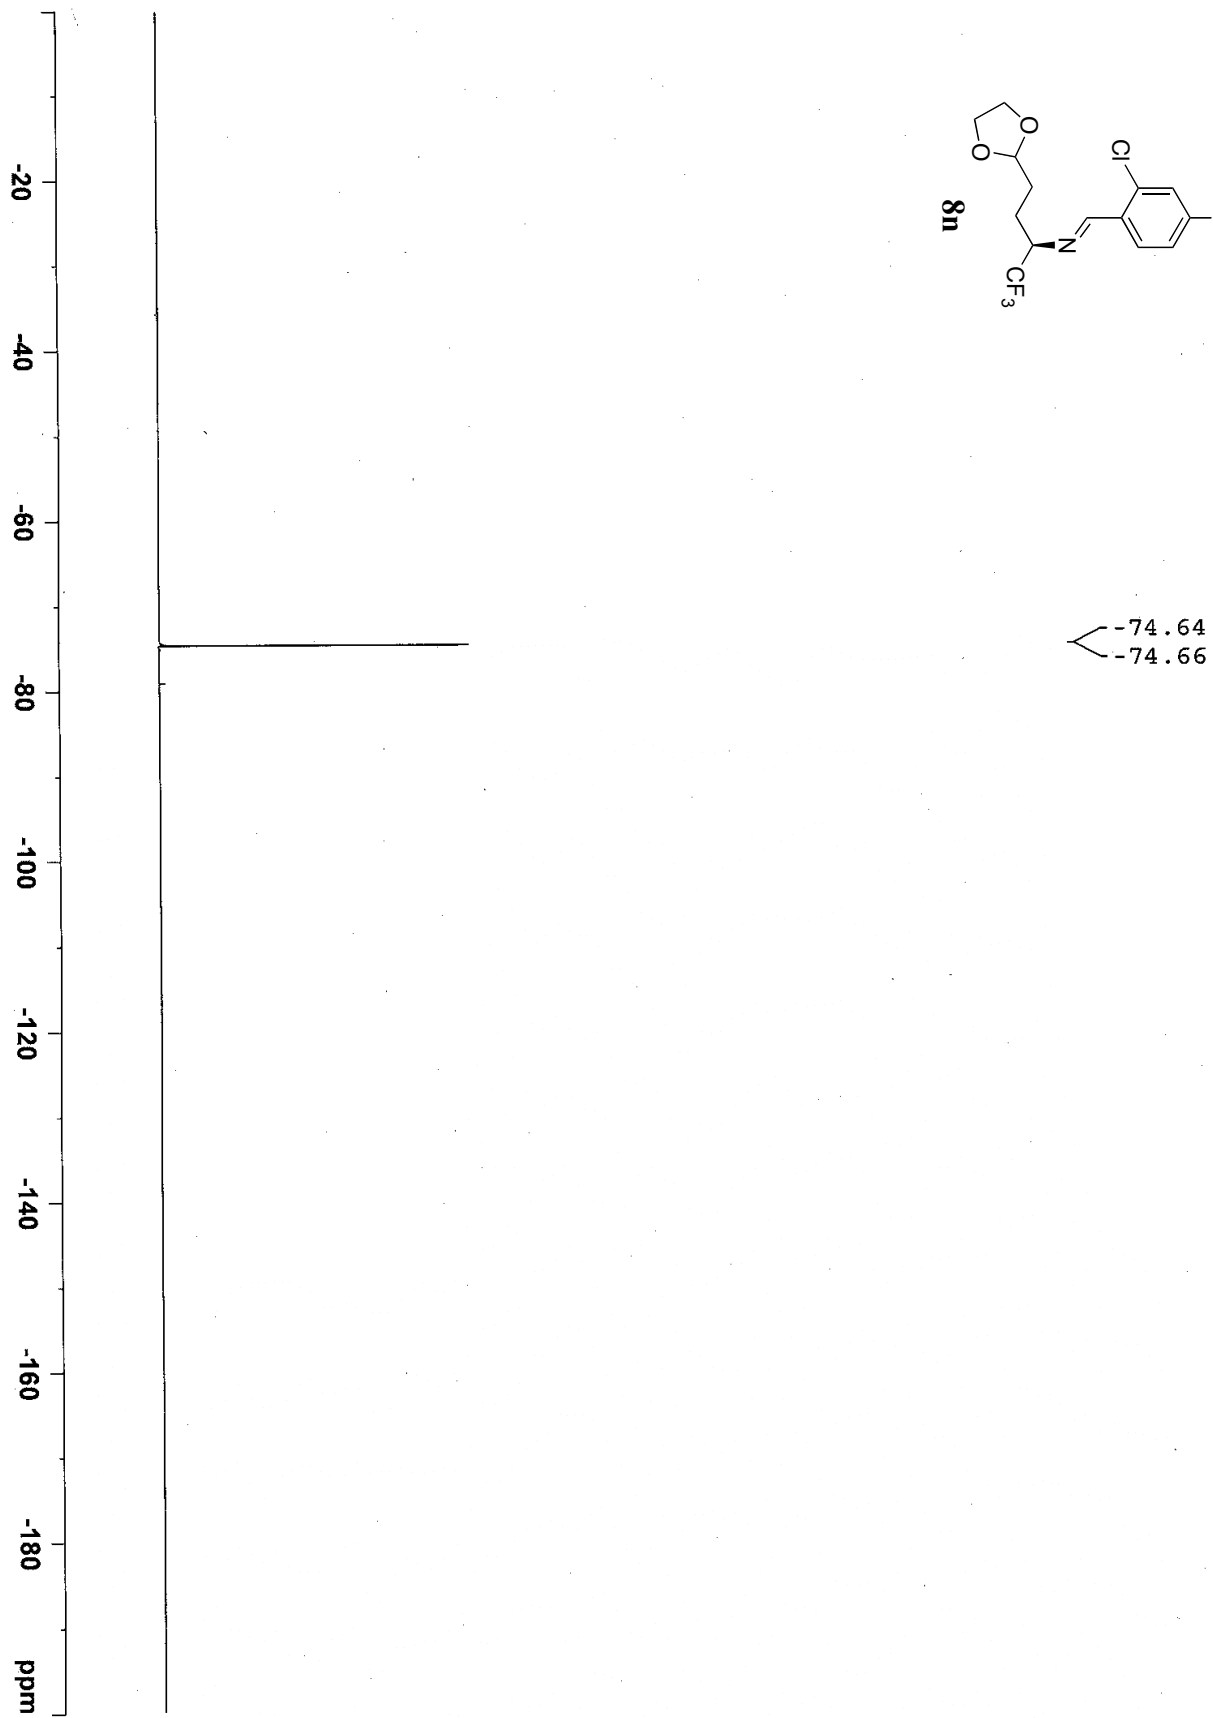



Table 2, entry 15

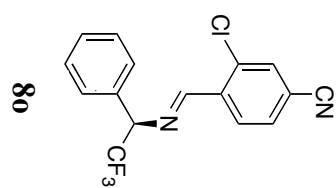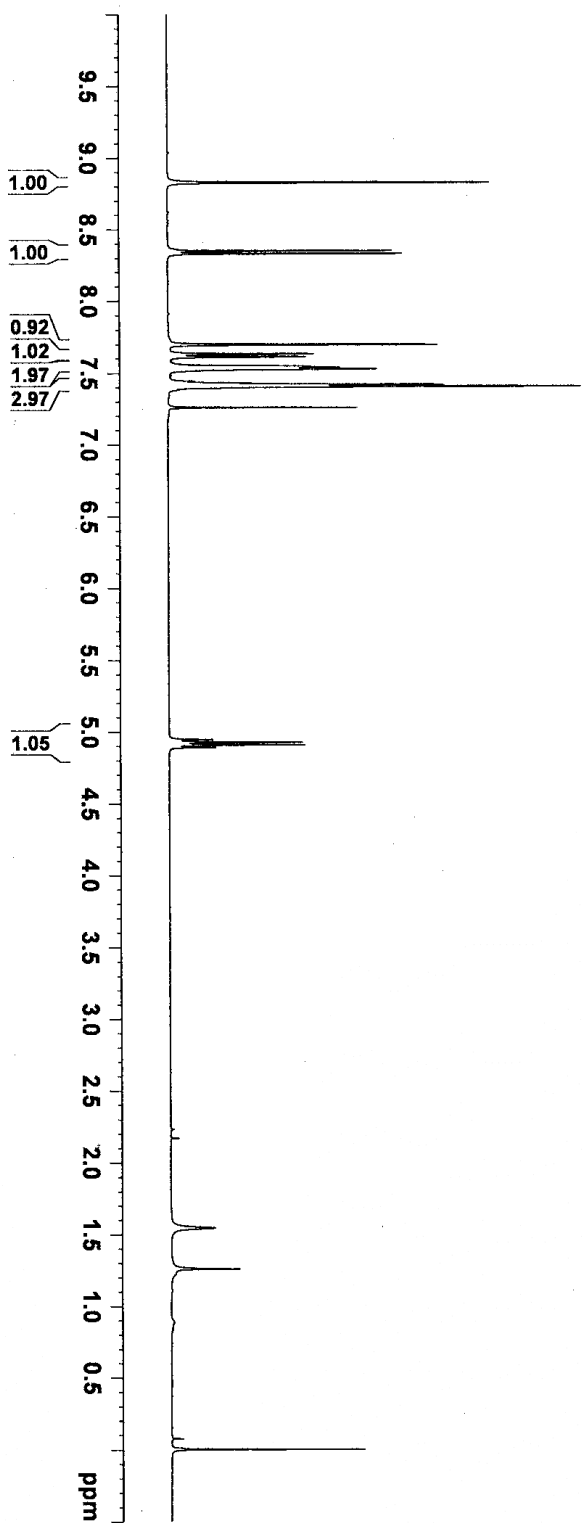

Table 2, entry 15

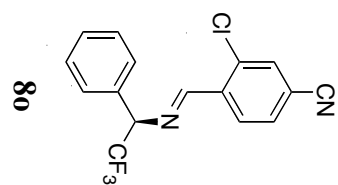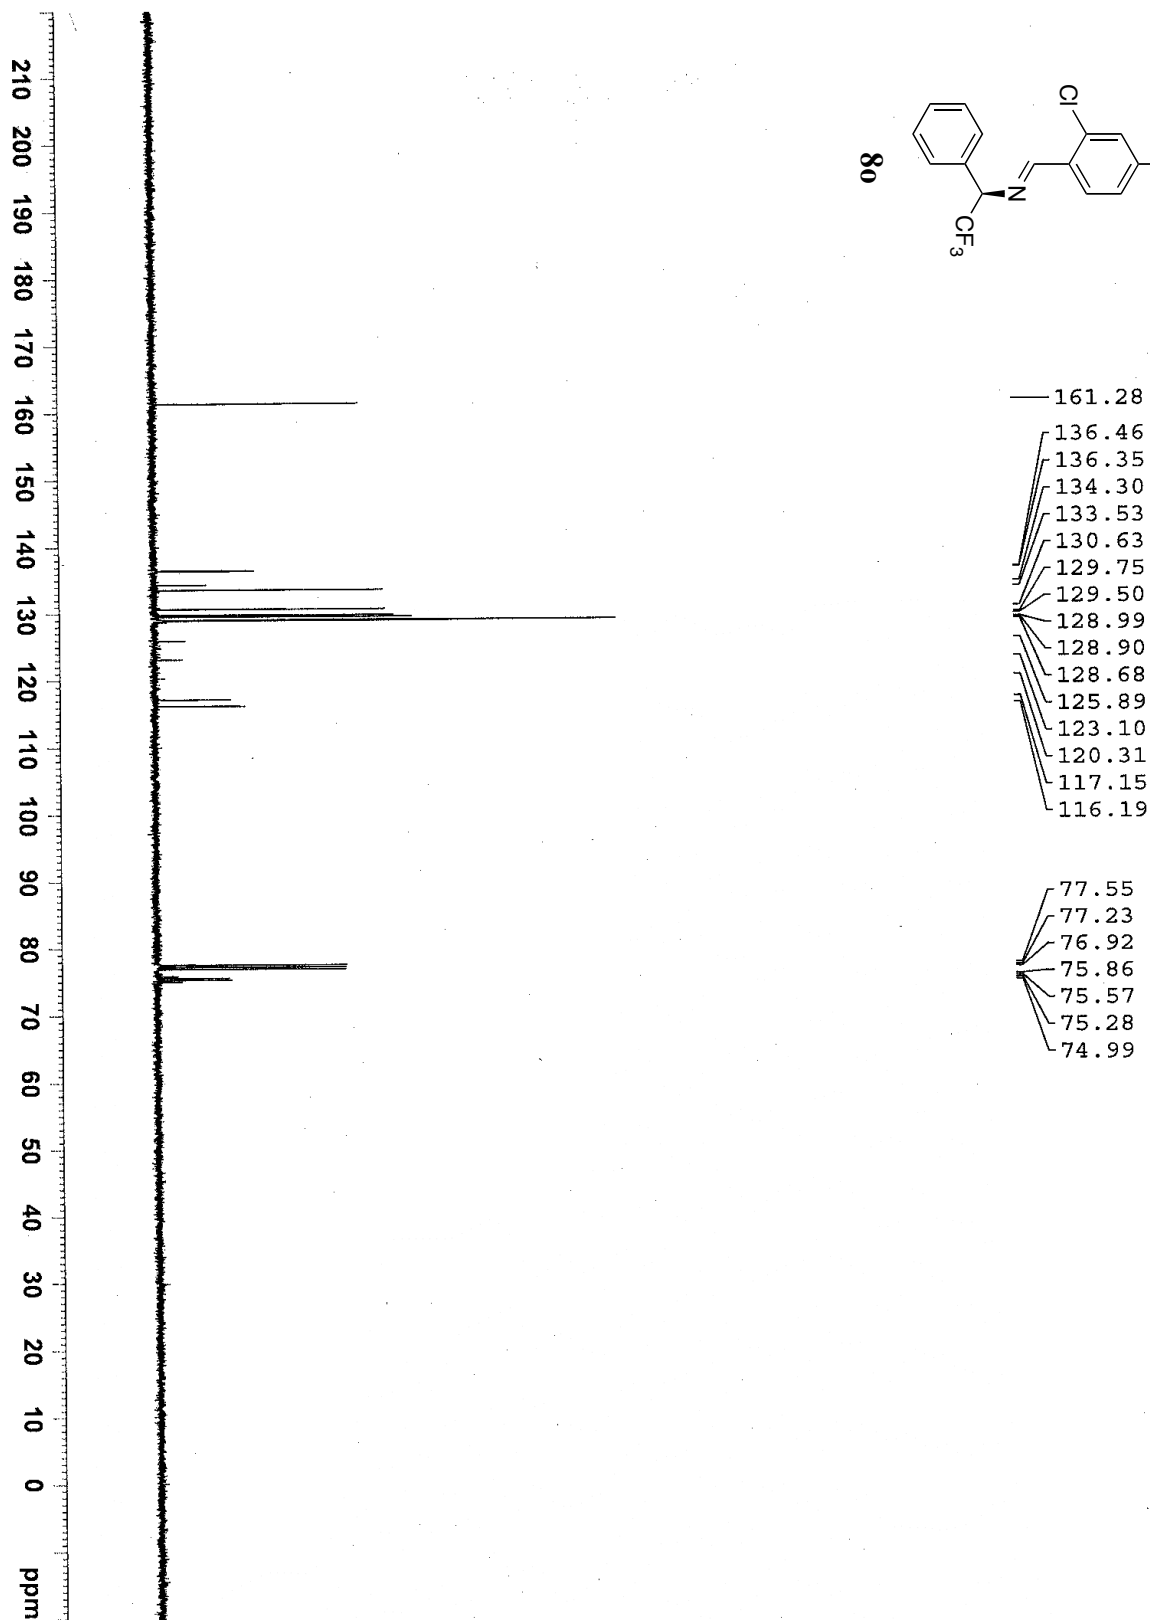

Table 2, entry 15

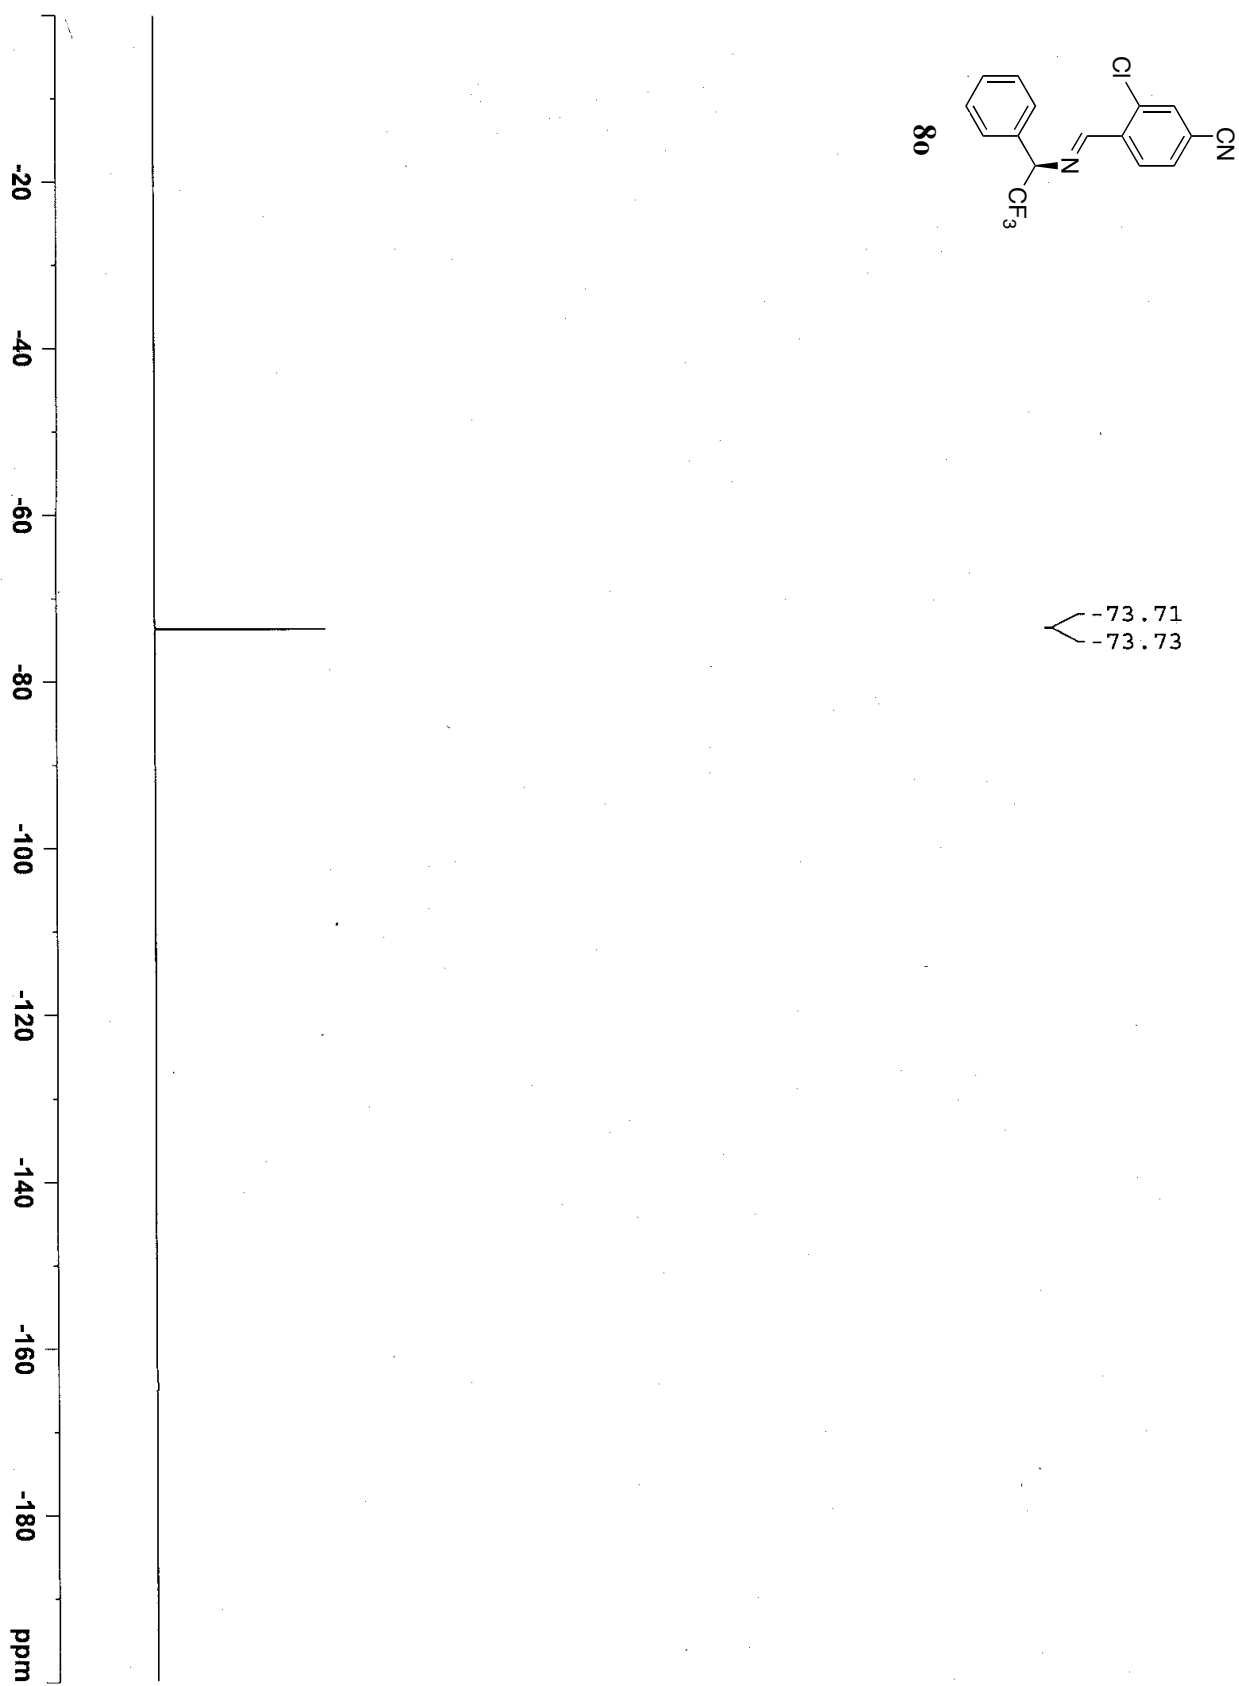

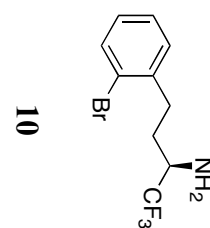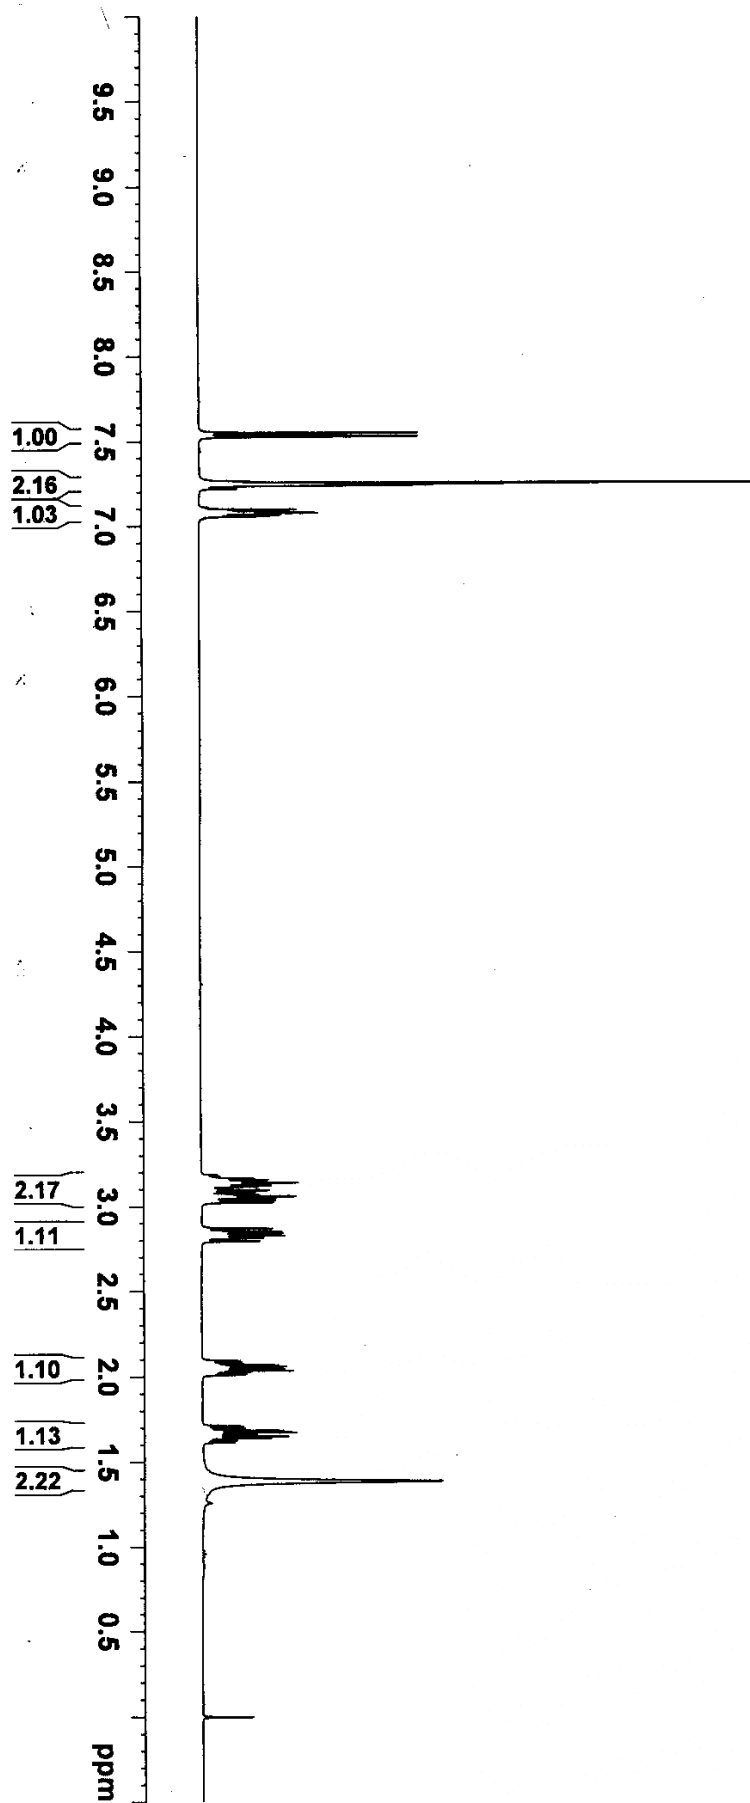

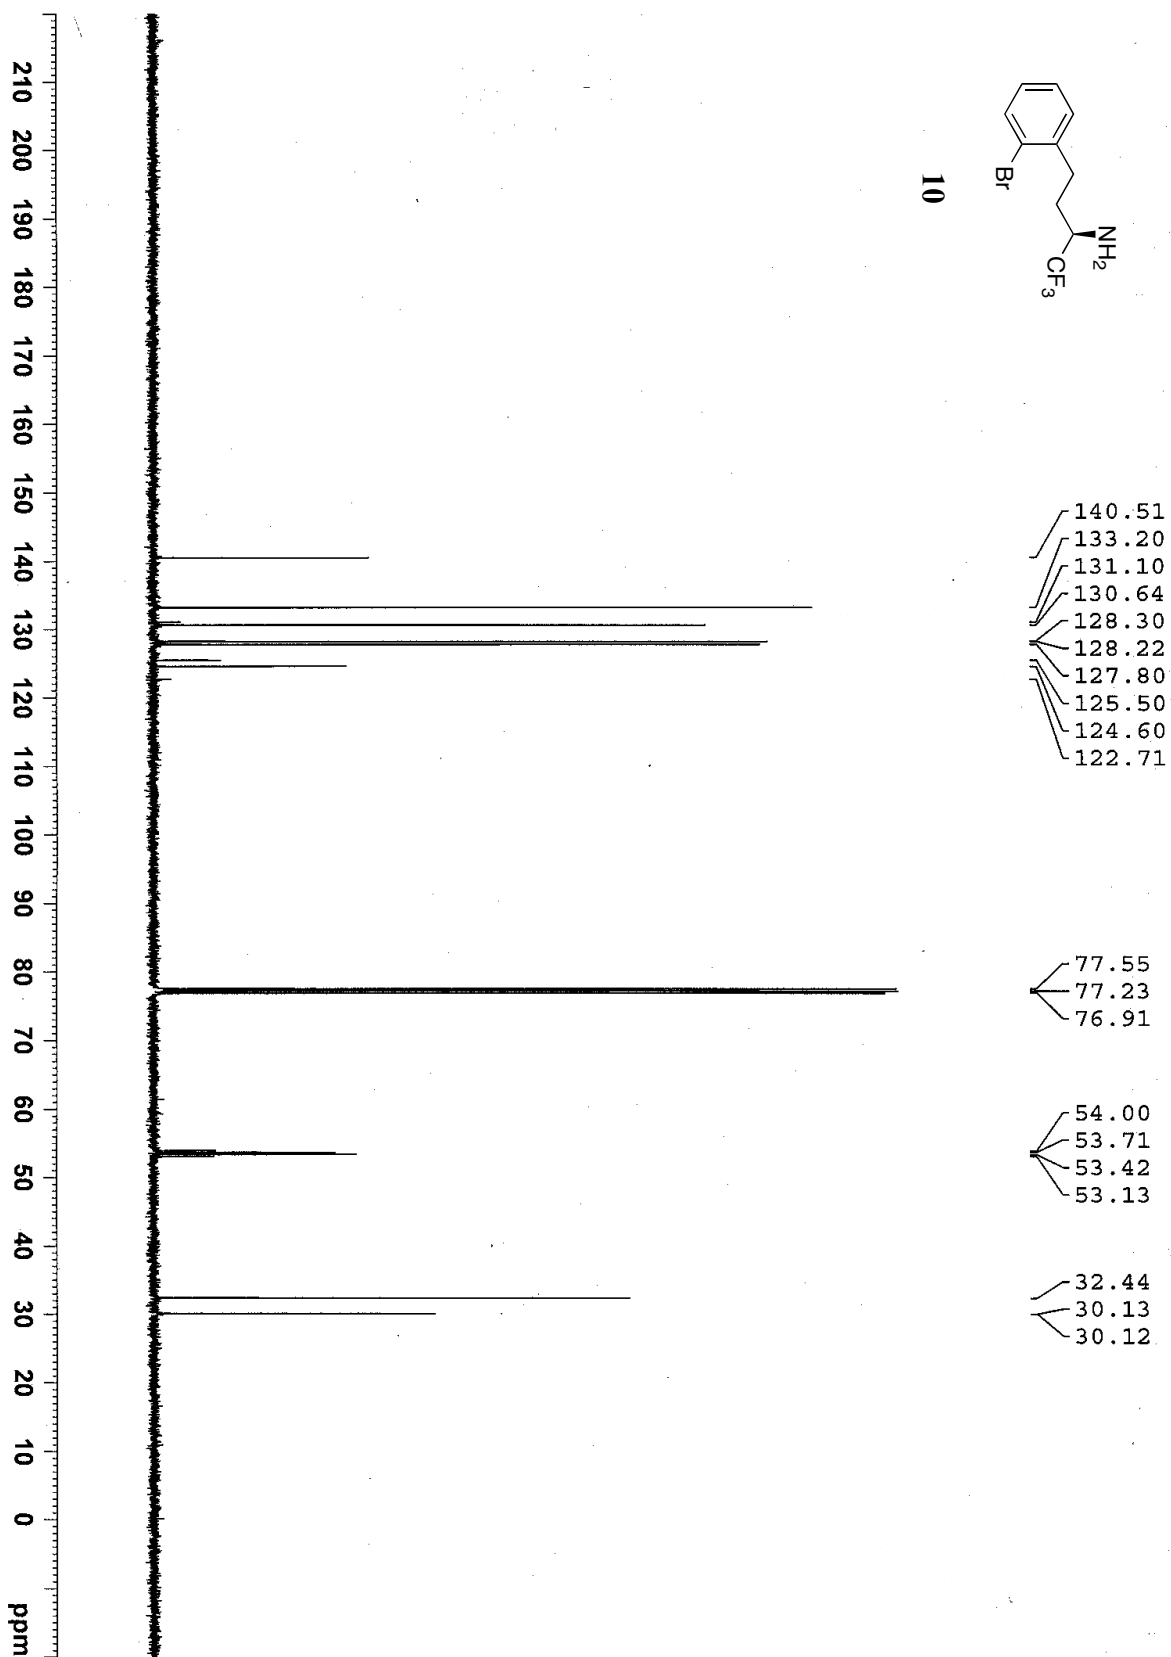

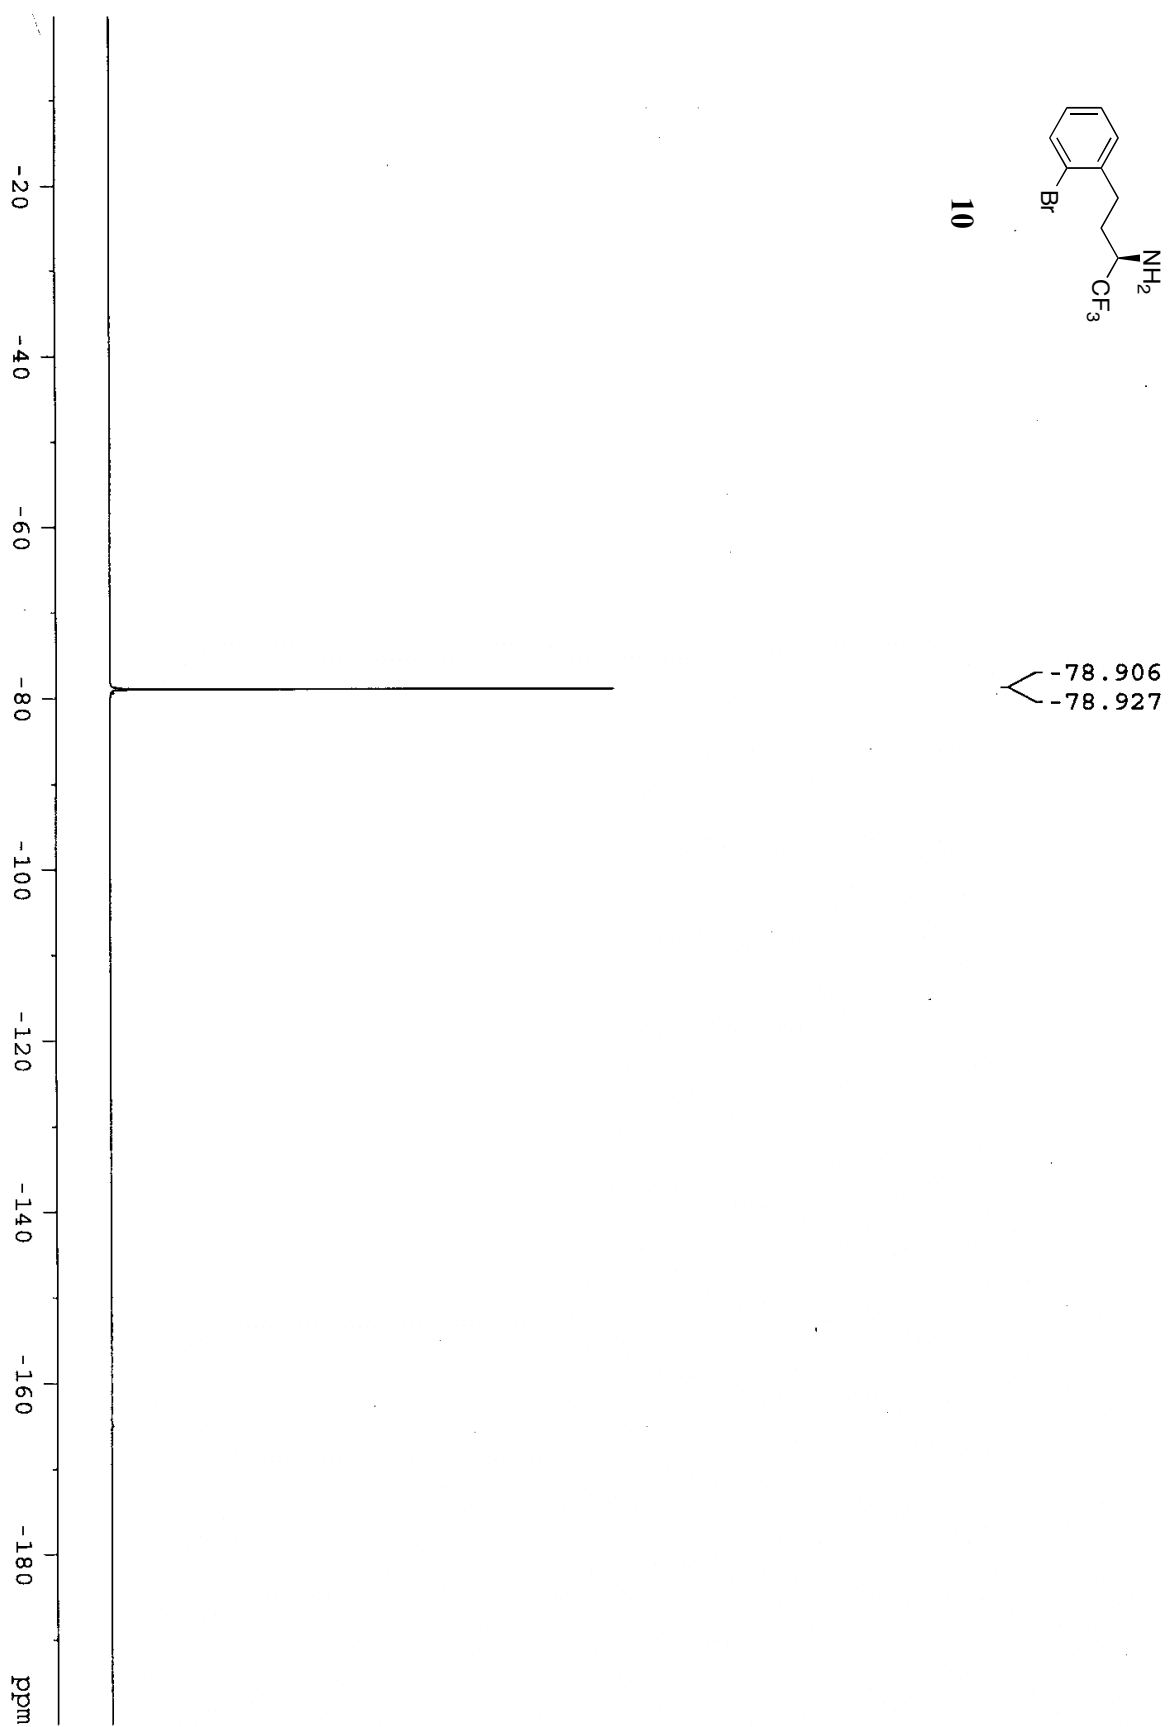

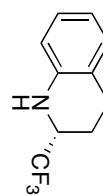

11

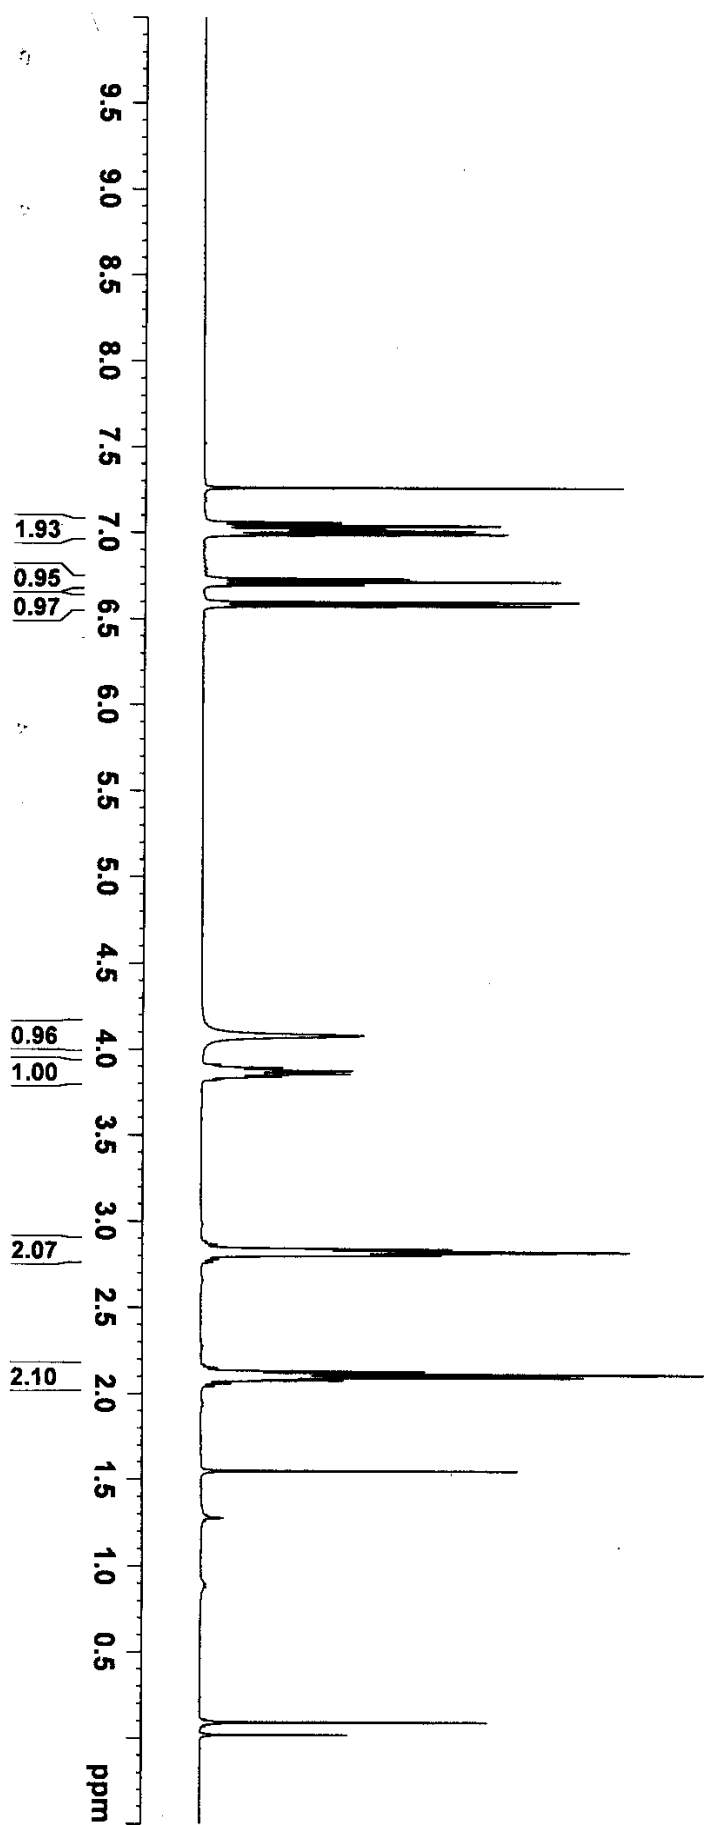

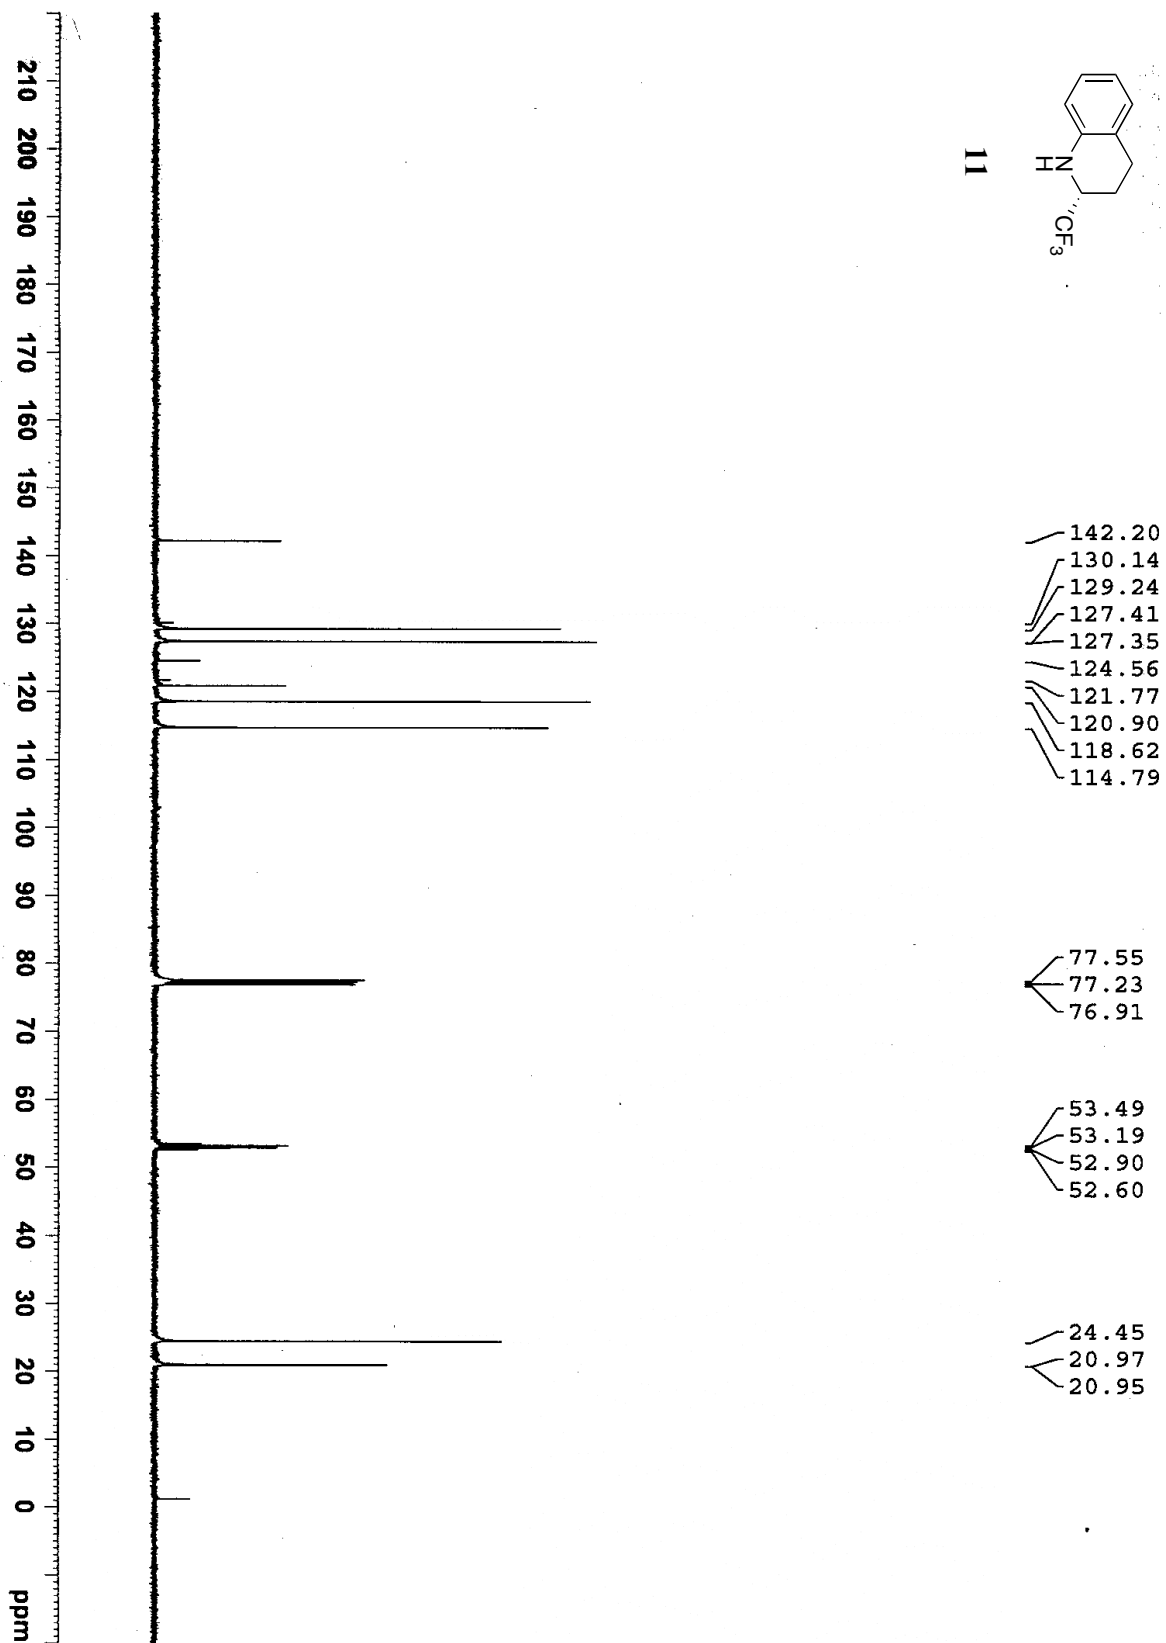



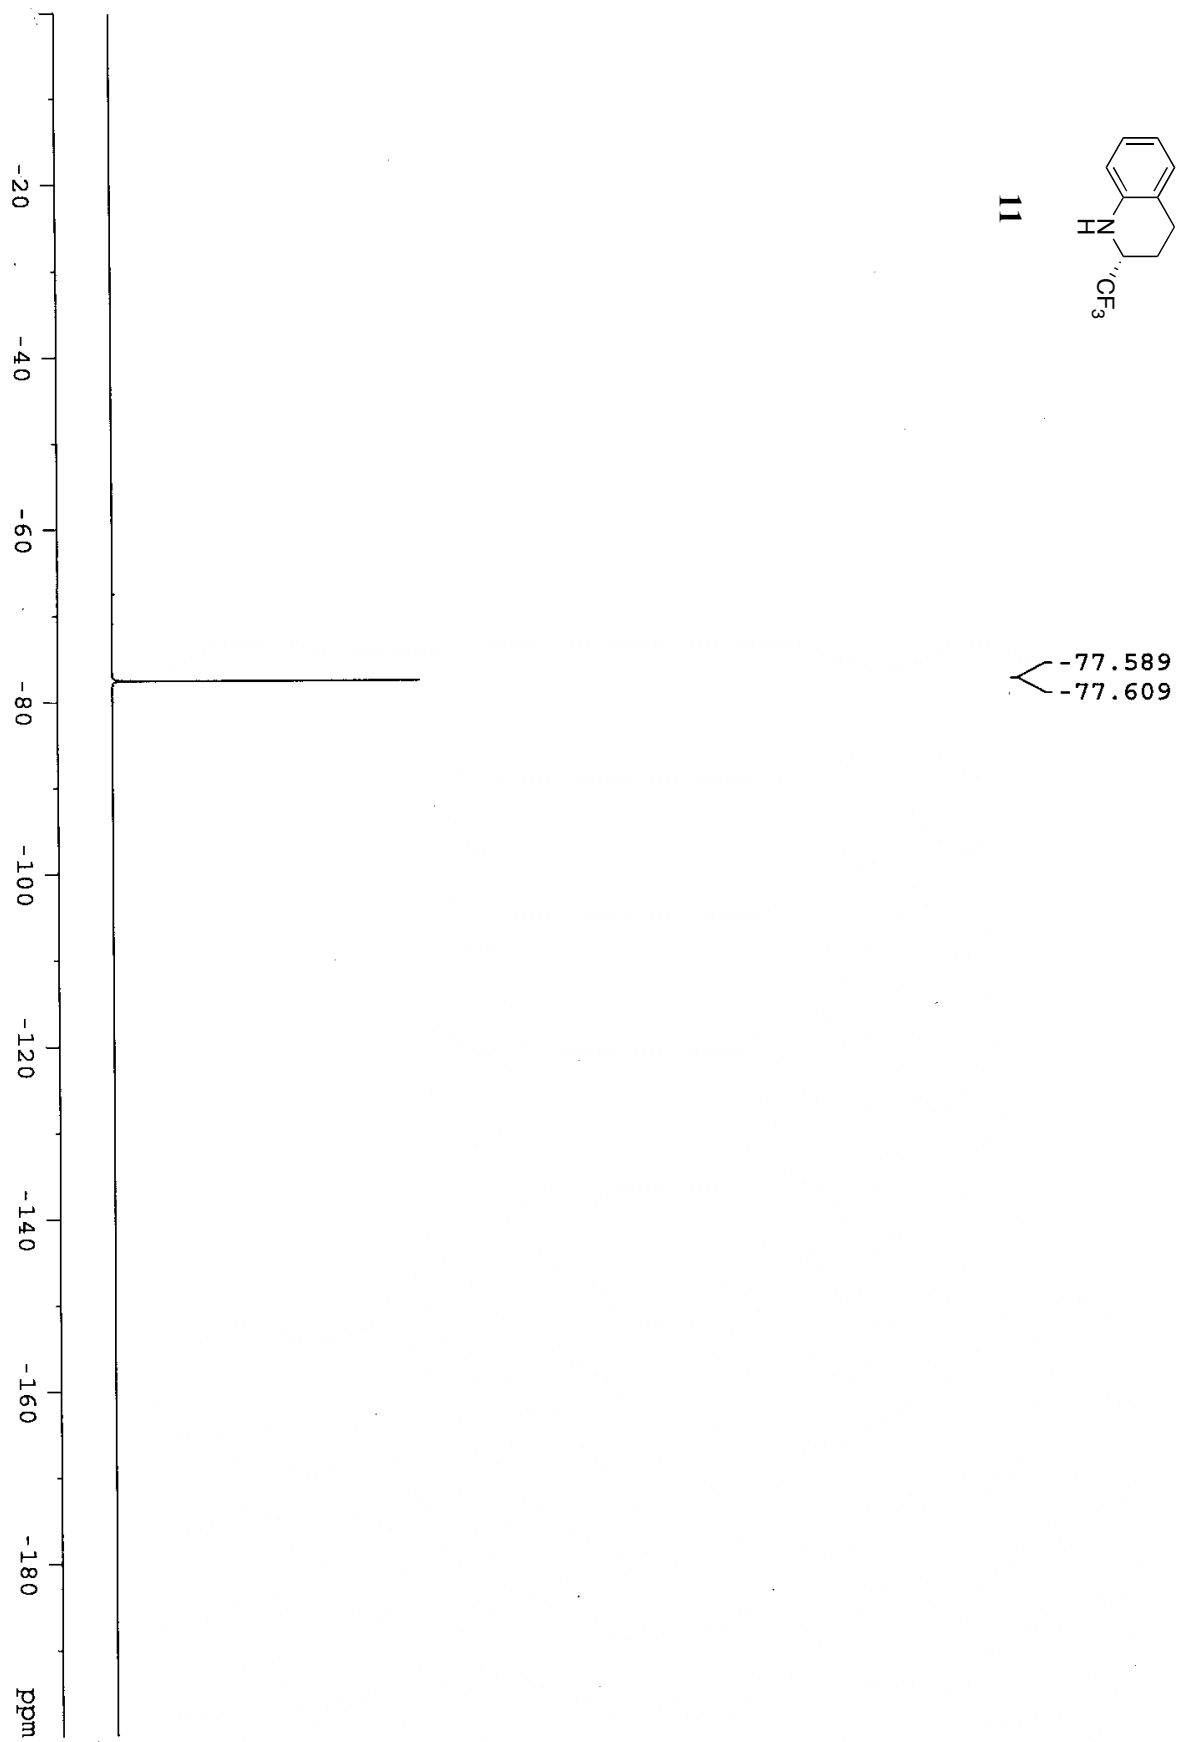

Supplement: c2cc37423d.pdf [file c2cc37423d.pdf]
